# Supplementary material for: Facilitators of and Barriers to Implementation of Financial Incentive Interventions for Health Behaviour Change: A Systematic Review
Source: Research Square preprint supplement (doi:10.21203/rs.3.rs-8059982/v1), 2026-02-02
Supplement: Supplementary file 1 [file 7bf83682da97089d92ff7c1c.xlsx]

## Sheet: CH Barriers-Capability
Study ID	Author, year	Topic Area	Barrier	Barrier (Summary)	Severity	COM-B	TDF	Intervention functions	Policy Categories	Quote
2	Wingfield 2015		[Lack of availabe evidence on TB-specific FI Uncertainity regarding the main objective of the FI and planning of the Cash transfer size/ design ] There was a lack of available evidence and thus clarity when prioritising the output of the cash transfers in these TB-affected households. Thus, deciding on the cash transfer amounts and timing was difficult. The lack of published evidence of similar s…	Lack of available evidence and thus clarity on TB- specific cash transfers incentives schmes and their design in resource constrained settings.		Psychological capability	Knowledge	Education	Guidelines, Regulation
2	Wingfield 2015		[Lack of expertiese in cash transfer interventions]Project conditions requiring all members of the TB-affected household to participate were poorly achieved and not equitable due to different household sizes. As a research team, we had limited experience of cash transfer interventions or working with new urban study communities ;Achieving a balance between operational simplicity and complex TB-af…	Limited experience of cash transfer interventions or working with new urvan communities hence achieving a balance between operational simplicity and complex TB-affected household needs was challenging.		Psychological capability	Skills	Training	Guidelines, Service provision
3	Patel 2019		[limited awareness of the scheme] Lack of awareness;About the DBT scheme benefits –– About documents required for enrolment .	Limited awarness of the DBT scheme, available documents and its benefits.	Minor	Psychological capability	Knowledge	Education	Communication/marketing	"I do not know. Because I have not checked my bank account statement. [Patient verified his bank passbook and confirmed the credit of DBT on request by PI]."
5	Musiimenta 2024		[Money transfer issues challenges] Participants not recieveing transfers as intended and refunds had to be issues. 4 (10%) of the 40 participants received cash (once during the study period) as refund for the transport fare instead of being sent the mobile money incentive for transport to the clinic. These participants did not inform the study staff on time about their next clinic visit date, whi…	Participants’ failure to inform study staff of their upcoming clinic visit dates which disrupted the timely input of data into the WiseCash system and delayed the automated incentive transfer.		Psychological capability	Memory, attention and decision processes	Environmental restructring
6	Verma 2024		[Lack of awarness of programme] The patients heard regarding the scheme for the first time from the healthcare staff.	Limited awarness of the incenitve scheme.		Psychological capability	Knowledge	Education	Guidelines, Communication/marketing	“In government hospitals from where we get tablets, they informed us.”
6	Verma 2024		[Physical impairment of TB patients challenges as a barrier to incentive reciept] Weakness was the main ailment suffered by the interviewees that stopped them form carrying out any regular day to day activity, their job etc.	Physical impairment (weakness) hindering their ability to function, let alone access the bank to receive the incentive.		Physical capability	Skills	Enablement, Environmental restructuring	Environmental/social planning	“Because of the illness couldn’t visit the bank. Legs pain a lot hence couldn’t walk or move around much.” “During the TB illness the person becomes so weak that they cannot do their job. In such situations the problem is that people don’t support as well.”
7	Mohan 2024		[Technical support gaps and skill deficits] Obtaining technical support to address such glitches was reported to be difficult. The program staff struggled to navigate the digital platforms, caused partly by their inadequate technical skills, highlighting the need for better training modalities to support them in operating these platforms. [Ilitracy and lack of tailored banking messaging] In addit…	Staff struggled to navigate the digital plaform due to inadeuate technical skills. Clients faced digital literacy challenges included not being familiar/ comfortable with technology and digital financial transaction/ Automated Teller Machines (ATM).		Psychological capability	Skills	Training	Guidelines, Service provision
7	Mohan 2024		[ Lack of knowledge and subsequent hesitancy of clients] PwTB from the private sector facilities hesitate or are unwilling to share their details with the health workers leading to a delay in enrolment and subsequent processes. Many PwTB did not have the required information about NPY and its processes, which prevented them from enrolling in the scheme and sharing their bank details. The district…	Clients limited knoweledge of the scheme, benefits its processes which prevented their enrollment/sharing information. Clinets faced difficulty comprehending the SMS from banks/scheme (that may not be in their mother tongue) which delayed utilization of the benefit if at all.		Psychological capability	Knowledge	Education	Guidelines, Communication/marketing	"Problems from the patient’s side are usually related to their unawareness of the scheme. They are not properly informed that the money is being provided for nutritional purposes. They don’t have proper bank accounts; they are hesitant to share the details, and they don’t bring the documents on time, which results in delay in validation of the account."- District- level NTEP staff "I purchased fi…
11	McKell 2013		[restricted awarness of all key providers of the programme] Not all relevant professionals were fully aware of the study taking place. Community pharmacists in the study area had access to a network of pharmacy advisors who were interviewed as a group. i.e. pharmacy advisors did not recall having been told about the study. Advisors agreed that this information would have put them in a better posi…	Providers limited awarness of the scheme taking place		Psychological capability	Knowledge	Education	Guidelines, Communication/marketing
11	McKell 2013		[Digital literacy limitation and skills gaps ] some skills gaps also emerged in relation to advisors’ computer literacy and ease with data entry, and it could not be assumed that those with advisor skills had sufficient confidence in that area for the demands of the study. Whilst basic electronic data entry was part of their work, the initial study protocol for advisors to input data to the porta…	Providers shown skill gaps in computer literacy and ease with data entry to cope with scheme demands		Psychological capability	Skills	Training	Guidelines, Service provision
19	Yon 2024		[Recruitment challenges due to providers lack of confidence] Another unexpected barrier to recruitment/enrollment was service staff’s lack of confidence initiating meaningful conversations with women around tobacco use. Staff found that conversations with women were often less about tobacco use and more about providing social/ emotional supports around navigating difficult home and family situati…	Communication and interpersonal skills gap in initating initiating meaningful conversations with women around tobacco use		Psychological capability	Skills	Training	Service provision
20	Tranby 2025		[ Smoking cessation self-report questions: unclear wording leading to disengagement] Additionally, PWS received a text message at each check-in with a link to answer the three self-reported questions. However, the initial wording was confusing (“You’ve been selected for a short survey!”) and led early participants to delete the link. The wording was changed later, and the questions were also avai…	Scheme messaging system included confusing wording and led participants to delete the link.		Psychological capability	Knowledge	Education	Communication/marketing
22	Shelus 2018		[ limited staff experience in explaining FI processes and appropriate timing clinical setting( HIV) and language/cultural misunderstandings ] Staff members reported that explaining the intervention to patients who had just learned of their HIV infection could be very challenging. Some staff suggested that difficulties were exacerbated when study staff who were not especially trained or experience…	Communication and interpersonal skills gap in explaining the intervention to patients who had just learned of their HIV infection, particularly, when study staff who were not especially trained or experienced in counseling patients with newly diagnosed infection were tasked with disbursing the coupon		Psychological capability	Skills	Training	Service provision	Having to tell somebody they’re positive really is hard enough without dealing with ‘Can you sign here for this coupon and can you be part of this study?’. And the patient is like ‘I just found out that I’m positive.' [Staff member] Just telling the patient. . .about the program was kind of difficult. Especially for the other coordinator. . .he didn’t have the background that I have. So it was ki…
22	Shelus 2018		[Cognitive demand needed for incentive claim] Additionally, patients had to retain their coupon after receiving it and present the coupon at the care clinic at both the first and second visit in order to receive the gift cards. Some staff reported problems with patients losing coupons.	Process of redemption of the incentive was cognitively demanding requiring patients to retain and present the coupon at different clinic visits.		Psychological capability	Memory, attention and decision processes	Environmental restructring		I’ve had people really plead with me between visit 1 and visit 2. You’re supposed to give themthe coupon, they’re supposed to bring it back. Now that’s tough for some people. That is very, very tough. [Staff member
25	Powell-Jackson 2009		[ Difficulties in understanding incentive policydue to limited dissimentation] Many respondents were unclear about aspects of the policy. They reported that there had been inadequate dissemination of information to the districts. The confusion created variations in implementation and affected the ability of health workers to disseminate information in communities, potentially hampering the effect…	Providers were unclear about aspects of scheme policy which created variations in implementation across district and hindered their ability to disseminate information about a programme that they themselves did not fully understand. Also, providers were unclear about what was expected of them and identified a general lack of guidance to carry out scheme-related activities.		Psychological capability	Knowledge	Education	Guidelines, Communication/marketing, Regulation	"Most importantly, the staff should be properly oriented before launching the programme." "I am not sure about getting the incentive when referringthe women to another facility after I attended her first. And I am also not sure from which facility the women will get the incentive..." "We were all confused about how to distribute the incentive and we were not sure whom to give, [and] how much to g…
25	Powell-Jackson 2009		[Poor planning of budget and lack of monitoring systems] The amount budgeted did not match requirements, or the amount released was less than the amount stated in the budget.	Lack of monitoring system and poor planning of budget relative to intervention requirements		Psychological capability	Behavioural regulation	Education, Enablement	Guidelines, Regulation, Service provision	"We started working with a tentative plan but as the number of deliveries increased, women who delivered in the beginning got the incentive and others were left out. About 40 to 50 women did not get the incentive. Those who did not get [the money] started fighting with us."
28	Gupta 2018		[Unclear intervention aims] Lack of clarity on the aim of the programme despite messages in mission documents of whether the JSY was a programme to imporve quality and outcomes of MCG services or a cash incentive programme to shift childbirths to the facilities.such perceptions also seem to have isolated the JSY from the overall functional ambit of RCH and the broader program mission	Lack of clarity on the programme aim and its positioning amidist other nationwide initatives/ missions		Psychological capability	Knowledge	Education	Communication/marketing
29	Baba-Ari 2018		[ Percieved Vs (unclear) true programme objectives] The perception of the initiative (including possible benefits) was a major determinant of response to the programme. Perceived programme objectives did not need to align with the true programme objectives to promote uptake. Most respondents did not fully comprehend the reasons behind CCT programme itself, eg, expected health gains and improving …	Limited knowledge of actual programme objectives and the reasons behind the scheme itself. Unclear payment mechanisms were a challenge. Clients were not aware of how /told when these payments would occur.		Psychological capability	Knowledge	Education	Communication/marketing, Service provision	“When I first heard about it I said it was good of the government to finally remember us in the villages because like me now, I don’t work…the programme is a good one if they can continue it because it will show they are interested in the poor people and want to help us...” “I heard they were giving money if you come to deliver here, so I came... I don’t know if I will come again (if the programm…
30	Contractor 2018		[Poor understanding of the intervention and unawarness of services available] While there was a reliance on incentives and disincentives to increase coverage of services, there appeared to be a gap between the intended purpose of services and women’s understanding of it. During ANC check-ups, which were conducted at the VHND once a month, almost all women reported receiving iron folic acid (IFA) …	Knowledge gap between programme objectives , the behaviours, their validation methods involved and users understanding of it resulting in disengagement. Failure to build on building well-established local understanding of safety during pregnancy the approach was to ignore these and introduce new practices, the reasons for which were not clear to the women. Limited awarness of government-set servi…	significant	Psychological capability	Knowledge	Education	Guidelines, Communication/marketing	“How can we predict when the baby will be born? It will be born when it is time.” There was also a belief that complications and death, if they have to occur, will occur anyway and nothing can really be done to stop them apart from allaying the spirit (doomba).
31	Dickin 2022		[Non adherence to FI protcol due to misinformation] Healthcare staff reported several reasons for not adhering to the intervention including: believing that the intervention had ended.	Limitied awarness of providers scheme ending point leading to misinformation to users.	significant	Psychological capability	Knowledge	Education	Communication/marketing
33	Payne 2013		[Lack of real-time monitoring and missing feedback loop] Informal tracking was based on monthly distribution logs completed by both farmers’ markets and CBOs and returned to DPHO representatives which caused delayes. Once the coupons were in the hands of customers, DOHMH could not track them until they were submitted by the customer as payment to the farmer/vendors at the market and returned by t…	Retrospective monitoring due to lack of real-time tracking and delayed feedback for coupon use.		Psychological capability	Behavioural regulation	Enablement
34	Brown 2019		[incentive form] Interview data indicated that the paper-based voucher system was not always well understood by customers and was reported to be a barrier to participation and could have therefore influenced voucher uptake.	Limited understanding of paper-based voucher system by customers leading to reduced uptake.		Psychological capability	Knowledge	Education	Guidelines, Communication/marketing
34	Brown 2019		[ Burdensome processes and limited capacity for support ] Issues with the reward offer which required more support to run the offer. Issues identified by store staff included: 1) being unsure of how to process the voucher in the store electronic grocery management system; 6) Supporting store staff proved challenging due to..variable expertise among store management in merchandising of fresh produ…	Voucher handling challenges in the electronic management system and variable expertise among management in the area of merchandise/ running offers.	significant	Psychological capability	Skills	Training	Guidelines, Service provision
36	Masci 2020		[Limited awarness of the programme processes] users' Individual-level barriers: imited awarness of programme processes, The most common individual barriers were 1) not knowing which FMs accept DUFB and lack of understanding of how the program works, Although all of the participants were currently using DUFB at their regular FM, many did not know about other locations that offered the DUFB program…	Limited awarness/understanding of programme processes, eligible settings and how it workded.		Psychological capability	Knowledge	Education	Guidelines, Communication/marketing	"But I find it hard with the food stamps to try to save enough food stamps through the whole month to be able to go and get the vegetables. . .I think maybe the program [DUFB], if they know you and know you have food stamps, that maybe you could be able to pay cash and still get the double bucks."
40	Silva 2023		[Limited programme awarness ] Two themes emerged from respondents’ suggestions for improving the program: (1) increasing awareness of the program and .... Many vendors suggested awareness of the program needed to be improved. Vendors stated that markets need “More awareness and signage at markets	Limited awarness of programme.	Minor	Psychological capability	Knowledge	Education	Communication/marketing	“Wish more people knew about it.” "Many customers are using tokens for the first time and were unaware of the program”
41	Franckle 2023		[Communication limitations] Also, it was reported that customers tried to use the coupoun at a non-participating store.	Limited awarness/understanding of programme processes, eligible settings.		Psychological capability	Knowledge	Education	Guidelines, Communication/marketing
41	Franckle 2023		[ Coupon redemention challenges:Human errors] The key barriers related to coupon redemption fell into two main categories: (a) human errors and; : Coupoun not scanned at correct point in transaction, scanned but handed cash back insead of discount application, applying diff. type of discounts ( flat $10 discount applied instead of 50% off.) , using it at non-participating store.	Human errors in the coupon transaction/redemption and incentive utilisation processes/	significant	Physical capability	Skills	Training	Guidelines, Service provision
42	Moore 2024		[feeling-ill equipped to solve technical challnges] The transfer of purchasing data from CCT to ET4 website initially blocked by the schools server, The principal suggested that she felt ill equipped to solve the problem. [Digital literacy challenges] ) register for the scheme on the website 2) use school email and password to confirm identity. urban school, had difficulty activating their accoun…	Providers being ill-equipped to solve technical challnges faced on the icentive website ( used to transfer of purchase data from CCT). Clients faced digital literacy challenges utilising the incentive website.		Psychological capability	Skills	Training	Guidelines, Service provision	" ‘And I see an email [from the study researchers] about checking systems and I’m going, I don’t know how to check systems, I don’t do that ahh help!’ ‘It seemed like a lot because of the delay at the start. If that had happened cleanly, it would have all appeared much more spread out and calm and organised and in these steps, but that didn’t happen and therefore we had weeks of trying to get log…
42	Moore 2024		[Teething problems and new interfaces] regarding operating the new till interface indicated that they were ‘wary at the start’ and there were some teething problems during initial implementation. For example, one canteen supervisor reported that it slowed the speed of service at the till at first. The supervisors also mentioned that reducing the habitual use of the ‘miscellaneous button’ and incr…	Manual dextriy and motor control skills needed to issue the incentive at the new till interface during busy service periods		Physical capability	Skills	Training	Guidelines, Service provision
43	Reese 2024		[SPS adherence amind rapport building: balance challenges] The coaches noted that some participants were talkative on a range of topics but did not seem oriented toward discussing fluid consumption. The coaches recognized the importance of building rapport with participants and being an active listener, but also staying focused on the goal of health improvement. Therefore, an important skill that…	interpersonal and communication challenges balancing building rapport and focusing on the goal of the incentive intervention.		Psychological capability	Skills	Training	Guidelines, Service provision
44	Zulman 2013		[Ambiguous knowledge transmission: cognitive load, clarity of communication, and decision-making processes, ] : One issue that arose in marketing the program was a need to unambiguously communicate the requirements for maintaining eligibility for financial discounts. Although the Walkingspree program had the capability to increase step-count goals over time, or allow participants to set personal …	Balancing programme requirements with unambigous communications to avoide cognitive overload.		Psychological capability	Memory, attention and decision processes	Environmental restructring		“Customer Service says,Averages are complicated; no one will ever be able to understand… We need to pick a number and go with a number.’” Another said, “We kept getting feedback that we can’t confuse our members. It has to be simple… You know, health insurance is confusing enough and then you complicate it with, well, you’ve got to do this, this, and this for that next month…”
46	Corder 2021		Ambiguity of roles and responsibilities] and intervention processes ] uncertainty of the roles that subgroups played within GoActive. [observations] One of the key factors contributing to the lack of implementation appeared to be the uncertainty of the roles that each subgroup p layed Other contact teachers indicated that their SLT did not fully comprehend the intervention. Most of the time, resp…	Gap in procedural knoweledge including unclear role assignment and challenges in fully comprehending the intervention. Clients faced challenges using the intervention website due to lack of knowledge of the website operation processes and reward receipt challenges due to limited awarness of whom to claim/collect rewards.		Psychological capability	Knowledge	Education	Guidelines, Communication/marketing, Regulation, Service provision	Initially I didn’t realise how much was involved and, to be honest, I don’t think my head [head teacher] knew how much was involved, I think he thought it would be, I don’t think he’d maybe read the information through and he didn’t realise, I think he thought it might be a month or two thing, done, he didn’t realise it was going to go on." "We never really got to use it though because we weren’t…
46	Corder 2021		[ Competency and assumed "digital literacy" ] Primary factors that may have contributed to the lack of implementation include a lack of Year 9 engagement. Year 9 students relied on the mentors to be competent at the GoActive activities, prepare the equipment, explain the rules, interact with those who were not engaging, and continuously encourage those who did not participate. Furthermore, mentor…	Limited competency of the mentors leading and managing intervention processes. Limited digital literacy to deal with technical challenges when using the intervention website.		Psychological capability	Skills	Training	Guidelines, Service provision	"Yeah, because I’m going to have to add on like sixty things because I’ve forgotten them for so long, and then like I get reminded and then I’ve forgotten the password or whatever, and then you have to e-mail them and it’s a bit . . ." "Couple of times they’ve shown us the cards with the different selection of activities and we’ll talk about which ones we want to do and generally there’s only foo…
46	Corder 2021		[Cognitive demand of using the incentive website] Also, issues encountered with the he GoActive intervention website: (2) they found the website hard to access or (3) they lost their username and/or password. Year 9 students discussed technical challenges to accessing the website, along with an inability to remember their password and sign-in for the website to log points, as key barriers. Partic…	Cognitive demand for website utilisation and multi-steps to record target behaviours and be eligible for incentive.		Psychological capability	Memory, attention and decision processes	Training, Environmental restructring
47	Jose 2022		[ unclear study information to participants] During pilot phase , issues relating to communication clarity with participants, Some confusion about the distinction between the app and the accelerometer amongst pilot study participants which led some to stop using the accelerometer if the app malfunctioned. S: modifications included improving study information provided to participants,	Unclear infotmation resulting in knowledge gap about different intervention componenets and their purpose.		Psychological capability	Knowledge	Education	Communication/marketing
51	Brolin 2017		[Difficult calculating productivity metrics] RSNs reported difficulty in calculating their productivity under this new system and concern that they were not meeting productivity benchmarks.	Challenges calculating productivity metrics in a new system aligning with professional benchmarks.		Psychological capability	Skills	Training	Guidelines, Service provision
51	Brolin 2017		[Complexity of the FI structure] The complexity of the incentive program may also have been a factor to hinder the intervention uptake and utilisation. There were 12 possible incentives that could be earned over a 90-day period, with varying time periods and flexibility. This schedule may have been challenging for the clients to understand given its complexity. The fact that there was flexibility…	Complex incentive structure e.g. 12 possible incentives that could be earned with varying time periods and flexibility posing as a cgonitive load on users impacting uptake and utilisaiton.		Psychological capability	Memory, attention and decision processes	Environmental restructring
53	Desrosiers 2019		[Complex population needs: low-functioning level] The clinicians linked the difficulty to implement the approach with group A with the patient’s lower level of daily functioning the patients. Indeed, patients in group A presented a housing and financial precariousness that can point to difficulties to integrate new habits, to respect commitments and respect a schedule.	Patients complex needs, lower level of daily functining and cognitive abilities leading to difficulties to integrate new habits.		Psychological capability	Memory, attention and decision processes	Environmental restructring, Enablement
55	Metrebian 2021		[User use issues] participants being unable to self-login at the pharmacy although these were quickly resolved early on. Of 500 messages sent out over the entire study period, 383 (77%) were successfully delivered to participants. Reasons for unsuccessful delivery included mobile phone turned off to conserve charge.	Limited user skills in logging in to pharmacy.	Minor	Psychological capability	Skills	Training	Guidelines
56	Winograd 2022		[ lack of clarity about the legal status of FTS relative to Missouri’s drug paraphernalia law] In Missouri, it is a Class E felony if a person “uses, or possesses with the intent to use,” items used to test drugs pre-consumption, but it is not illegal to possess FTS for their “on-label” use of post-consumption urine testing. Though researchers have found greater evidence of behavior change when F…	Limited clarity and confusion on the legality/ "grey zone " of fentanyl test strips use in relation to state policy for their “on-label” use of post-consumption urine testing to confirm behaviour.		Psychological capability	Knowledge	Education	Guidelines, Communication/marketing, Regulation
57	Green 2023		[Challenging skill set to manage incentives] his complexity poses a challenge for the CM provider to calculate and distribute the correct incentive at each visit. Participants shared that even with the Excel tracker aiding in the process they needed to make additional administrative decisions about:who would manage the gift card purchasing, how and where to store the gift cards, and how to establ…	Providers facing challenges calculating and distributing the coorect incentive at each visit and estabilising auditing processes to manage the incentive.	significant	Psychological capability	Skills	Training	Guidelines, Service provision
57	Green 2023		[Unclear Traget populations and referral conflicts] During intital implementation, unclear target population and client modifications across different sites and lack of awareness from referring organisations/agents. As a result, sites had to adjust how they were going to receive referrals and identify appropriate participants for the programme (narrowing the client base and tailoring the availabi…	Limited information/awarness on target population, client modifications and referring organisations/agents across sites.	significant	Psychological capability	Knowledge	Education	Communication/marketing, Regulation	"I was slightly unclear on the specific population when we were looking into the grants. I think we all thought, “Hey, this would be great for our prerelease [referred by drug court] residents.” And the more we looked at it’s like, “Oh no,” it’s somebody who is in active use and is needing to get some external motivation to work towards abstinence."
58	Curran 2023		[Ill equippedchallenge current practices for a highly educated Youth] As many of the young people highly educated and present their own views of cannabis use. Staff felt challenged and ill-equiped with evidence and skills to implement CM and lack of training in these areas was considered a potential barrier to future delivery. . Staff expressed a need for training to build their confidence in con…	Limited applied and practical competencies to balance between confidently implementing the CM intervention and communicate effectively with service users who are highly educated and have their own views of cannabis use		Psychological capability	Skills	Training	Guidelines, Service provision
61	Hallgren 2023		[Remote nature and Onboarding challenges for a unique population] Was a Barrier for Some Patients Who Use Methamphetamine. 46% of the participants were not able to complete the necessary tasks for onboarding to the intervention as it was protocolized for this study, potentially because of fatigue associated with both the research activities (ie, screening, consent, and baseline assessment) and th…	Fatigue and inattention associated with multiple steps/activited and onboarding activities led to incompelete tasks completions by users. Forgetfullness to complete validation tests which were required to be with them most of the times. Participants struggled to stay engaged with the intervention, partly due to difficulties remembering and processing complex information which could be owed to met…	significant	Psychological capability	Memory, attention and decision processes	Environmental restructring, Enablement
61	Hallgren 2023		[Clinician barriers to mhealth preperadness for uptake] Reported by clinicians including: Low clinician familiarity [Percieved limited digital literacy and use of testing tools]	Low provider familiaty with the digital interface, limited digital literacy and use of testing tools		Psychological capability	Skills	Training	Guidelines, Service provision
66	Research Triangle Institute and National Academy for State Health Policy 2017		[lack of understanding of incentive delivery/clain processes] Additionally, some participants had difficulty accessing the ChipRewards system and actually redeeming points for items. Other participants did not realize that they were eligible for incentives, did not understand the process, and never redeemed their incentives New York also discussed the complexity of its incentive schedule, noting …	Limited knowledge/ understanding of incentives eligibility, complex processess to redeem and the rewards system such wich led to some not getting the reward.		Psychological capability	Knowledge	Education	Guidelines, Communication/marketing, Service provisions
67	Perry 2019		[ Challenging intervention processess and need of ongoign support] challenging set tasks, and infrequent face to face peer support among others. Participants in Diabetes prevention and diabetes management programs shared that : tracking all meals was challenging and, at times, discouraging. Some weight management participants were not aware of the program end date and expressed frustration that t…	Users faced challenges in tracking behaviours and scheme goals.		Psychological capability	Behavioural regulation	Training, Education, Modelling
67	Perry 2019		[Lack of awarnss of intervention end date]Some weight management participants were not aware of the program end date	lack of awarness of programme end		Psychological capability	Knowledge	Education	Communication/marketing
41	Franckle 2023		[Low resonse rates - Cognitive overload] The log also cataloged that participants often did not answer both weekly and monthly income and SNAP usage questions on enrollment surveys.	Low response rates due to cognitive overload.		Psychological capability	Memory, attention and decision processes	Environmental restructring, Enablement	Regulation, Environmental/social planning, Service provision
47	Jose 2022		[ Cognitive overload and missed steps: Consent and logistic errors procedures] During Audit phase revealed some inconsistencies in the consent process, and confusion about assessment requirements. Some participants not given current Participant Information Sheet and Consent Form (PICF) : S: correct PICF provided to and signed by respective participants + iImproved record keeping of PICF version a…	Multistep processes of enrollment/assessments and subsequent inconsistent record keeping of participants flow in the system.		Psychological capability	Memory, attention and decision processes	Training, Environmental restructring, Enablement	Guidelines, Environmental/social planning, Service provision
67	Perry 2019		[lack of training and understanding of needs] Some smoking cessation participants shared concerns about program staff being untrained or unfamiliar with addictions or lacking understanding of a smoker’s experiences in trying to quit.	Concerns about staff being untrained /unfamilirar with addicitions struggles to quit smoking suggesting a gaps in practical competencies.		Psychological capability	Skills	Training	Guidelines, Service provision
44	Zulman 2013		[ unclear product changes and decision making delays - Ambiguity and indecisiveness on intervention structure and messaging]	Challenges understanding the aim and explicitly explicitly what the product changes weregoing to look like, what were the decisions being "uncharted waters" Ambiguity and indecisiveness on structure and messaging.		Psychological capability	Memory, attention and decision processes	Training, Environmental restructring, Enablement	Guidelines, Environmental/social planning, Service provision	“I would say to you that the single most difficult problem with this project was being able to wrap our arms around and define explicitly what the product changes weregoing to look like, what were the decisions … associated with change, and how arewe going to measure it and manage it. And I think it was very difficult because it was unchartered water … And there was some indecisiveness on the app…

## Sheet: Ch Facilitators- capability
Study ID	Author, year	Topic area	Facilitator	Facilitator Summary	Severity	COM-B	TDF	Intervention Functions	Policy Categories	Quote
2	Wingfield 2015		[Educational component of the intervention] In addition to TB prevention and control messages, an educational component was an important element of the participatory community meetings, in which participants were involved in educational activities concerning: managing a household budget; spending and saving responsibly; and meeting the conditions for cash transfers. This TB-related and financial …	A TB-related and financial education component which included learnings on meeting the conditions for cash transfers of the intervention which was highly valued as an ethically sound accompaniment to cash transfers.		Psychological capability	Knowledge	Education	Communication/marketing, Service provision	“I understood and learnt more, and saw that I was not alone”
5	Musiimenta 2024		[Reminders and layout of the monitors enhancing motivation and self-regulaion] SMS text messages and electronic pillbox alarms reminded participants to take their medication on time comabted forgetfulness and busy participants due to other comepting priorities which was repoted regularly.	Text reminders and electronic pillbxc alarms reminded participants to take their medication on time comabted forgetfulness and busy participants due to other comepting priorities.		Psychological capability	Behavioral Regulation	Enablement	Service provision	"Whenever I would receive a message about my adherence percentage, and it’s below, it would motivate me to be serious so that next time I don’t miss out again. [Male patient, aged 39 years]"
8	Chadhar 2025		[High knowledge and awarness of the scheme] Regarding awareness of the Nikshay Poshan Yojana, 84.8% (n = 213) of patients were aware of the scheme, while only 6.1% (n = 13) correctly identified its name. Among the aware participants, 61.9% had knowledge of the amount and purpose of the program, with 68% (n = 145) citing the Directly Observed Treatment, Short-course (DOTS) provider as their source…	High awareness of the scheme the amount and the purpose of the scheme, and the treatment provider at select centers was the main source of information for most of the patients.	Strong	Psychological capability	Knowledge	Education	Communication/marketing, Service provision
14	Smoking in Pregnancy Challenge Group 2019		[Clear guidance and training on scheme for advisors and HCP] All staff engaged in the scheme need clear guidance and training. This could be through written reminders or aids for staff. Guidance must be provided to healthcare professionals promoting and delivering the scheme on: »» Why an incentive scheme is being implemented and the evidence base, »» What the scheme is and what support women wil…	Clear guidance and training to healthcare providers promoting and delivering the scheme on relevent evidence base, the aim and structure of the scheme, expectations of clients/staff who do engage with the service, eligbility criteria, distribution and management of couvhers and protocols for managing relapse.		Psychological capability	Knowledge	Education	Guidelines, Communication/marketing, Service provision
23	Warnock 2025		[Prior experience and infrastructure with evidence/intervention] Most PrEP navigators had prior experience engaging in or facilitating research activities in their capacity as community-site staff. One even had previous experience in contingency management. Similarly, site leaders had a mix of research and clinical trial experience, with some having extensive experience partnering with, integrati…	Staff with prior knowledge and experience in facilitating similar initatives, evidence base or partnering with, integrating, and supervising similar programms.		Psychological capability	Knowledge	Education	Service provision	“I’ve been doing research for the last 20 years, and we’ve been a part of four or five multi-site clinical trials.” Another site leader highlighted the presence of their site’s dedicated research department and its impact on implementing research programs like CoMPASS: “I feel really lucky sitting here thinking about it, we have the research department. It’s developed a name and has an identity… …
24	Wagner 2025		[The app as a tool to structure, monitor and reinforce behaviour: High percieved usefulenss and immediate improvement in outcomes] Most YWH reported improvements in adherence after participating in the intervention and expressed interest in continuing to use it (even without CEIs) after the study. Some reasons behind this included that they thought the intervention was effective at raising their …	Application with constant reminders as a tool to systematically remind and aid self-monitoring to reinforce medication adherance was highly percieved as usel; improved issues around motivation, giving them a sense of responsibility for taking their medication regularly and a sense of security of not missing a dose due to other competing priorities/forgetfullness.		Psychological capability	Behavioral Regulation	Enablement	Service provision	“It [aDOT app] really helped because it made me be a little bit more in tune and aware with having to take the medication and I think a lot of the times I think of my medication as very, just so systematic to where I don’t even think about it. Because I had the constant reminders… it just made me be a little bit more aware of what I am doing. I am taking medications and this is important. It took…
32	Banerjee 2025		[ High awareness and knowledge of the scheme among eligible women and workers] Awareness of the scheme among eligible women was found to be high. Even though only 57.5% beneficiaries and 53.8% non-beneficiaries could recognize the scheme by name, almost all were aware about PMMVY when probed about the incentive for services available under the scheme (97.8% beneficiary women and 94.2% non benefic…	High awareness and understanding of the PMMVY scheme, the amount and the services available under the scheme relying heavly on frontline workers for dissementation Vs. traditional media		Psychological capability	Knowledge	Education	Communication/marketing, Service provision
36	Masci 2020		[Limited general knowledge about how to best use tokens] Food education emerged from the data, and it was only mentioned by 3 individuals. Participants experessed that learning how to store/prepare would make it easier to use DUFB. [Information on the scheme and its dissemenation] The most common program-level facilitators related to providing information on DUF.... The participants wanted more i…	A healthy-food realted l education component and information dissemenation on the scheme, how it could be earned and where to redeem.		Psychological capability	Knowledge	Education	Communication/marketing, Service provision	I learned how make hot sauce because I was able to get a bunch of peppers and it was just cool because I was like, “Oh, I had so much extra. It makes me want to learn how to cook other stuff and how can I prepare this and preserve it.”
40	Silva 2023		[Outreach Educational activities] participants expressed that such component of the programme helped increase awarness to target population and participation of of Hispanic/Latino and Marshallese shoppers	Outreach educational activities helpef increas awarness/participation of the target population.		Psychological capability	Knowledge	Education	Communication/marketing, Service provision
43	Reese 2024		[Adaptability in approach] and also flexible in scheduling SPS, while recognizing that for some participants, further attempts were not worth the potential cost of being perceived as a nuisance.	Staff self-monitoring and adjustment of behaviour (e.g., adapting scheduling, knowing when to stop follow-ups) and strategic decision-making to balance engagement with respect for participants' boundaries.		Psychological capability	Behavioral Regulation	Training	Guidelines, Service provision, Regulation
44	Zulman 2013		[Iterative imporvements and adaptive planning]	Iterative improvements based on constant stratgizing and adaptive planning to improve the scheme to be more meaningful to the community and overall better		Psychological capability	Behavioral Regulation	Training	Guidelines, Service provision, Regulation	“We’re constantly strategizing how we can improve the product, how we can make it more meaningful to the community, and what we can do overall to make it a better product”
45	Gilson 2017		[The power of monitoring a ] Activity tracker and smartphone application were seen as effective facilitator components of the intervention. Support by drivers via social media, and the ability to self-monitor and regulate healthy choices were viewed by drivers as valuable facilitators of change.	Electroninc activity tracker as effective facilitors to support clients self-monitoring and regulating health-eating habits by looking at the data.		Psychological capability	Behavioral Regulation	Enablement	Service provision	“As we get older, it’s hard to keep your fitness levels up, so by wearing the band and looking at the data, I could see what I was doing and I knew what to try and improve.” Local delivery driver (Participant 16)
45	Gilson 2017		[Percieved importance of the intervention & its role to promote awarness of the need for healthy changes and increase staff productivity] Drivers highlighted the value of Shifting Gears as an effective means of promoting awareness of the need for healthy changes, and The flow-on effects this may have for benefiting productivity.	Promoting awarness in the organisation of the need of the target behaviour [ healthy changes] and the impact of this on their productivity and taking less time off.		Psychological capability	Knowledge	Education	Communication/marketing, Service provision	“If your workers are more healthy, there is a good chance they’ll work for you and that increases productivity, and they (drivers) will take less time off. I never thought about it until you came to tell us.” Local delivery driver (Participant 11)
46	Corder 2021		[The points system: tracking feature via the website] Qualitative data suggested that all participants enjoyed keeping track of their physical activity and acknowledged the potential for it to act as a motivator for behaviour change:	Website activity tracker (point system) as a facilitor to self-monitor physical activity and motivate behaviour change.		Psychological capability	Behavioral Regulation	Enablement	Service provision	"Yeah, I think it did, sometimes if I thought, like, ‘Should I go and do something or should I not?’ well, actually, if I go and do it then I can go and log a point on."School E, focus group, S5 "I can like keep track of, I can see myself like how active I’ve been and it’d probably encourage me to do more activity."School D, individual interview, I1
47	Jose 2022		[ Weekly Email notifications] Participants in the intervention group also received weekly emails about their weekly bus trip target as part of administration of the intervention, with 59% of intervention participants strongly agreeing/agreeing that the weekly emails were helpful. Interviews revealed that the timing of these emails may have impacted their utility..	Reminder prompts ( i.e weekly email notifications) about bheaviour targets		Psychological capability	Behavioral Regulation	Enablement	Service provision	" I mean ideally it would be good, say on a Sunday night, to get a notification, “This week you haveto catch the bus five times to reach your incentive,” because there are times when I thought, how many times am I needing to catch the bus? [P69].
48	Hagedorn 2014		[support and empircally supported interventions] When asked what types of assistance would be most beneficial to support implementation, suggestions included educating staff and facility leadership regarding the evidence for incentive intervention	Education of staff and facility leadership on evidence for incentive intervention.		Psychological capability	Knowledge	Education	Guidelines, Communication/marketing, Service provision
50	Hartzler 2016		[Serial training outcome assessments hightened confided in post-trial sustainment] To what extent did serial training outcome assessments contribute to sustainment of CM? We believe scientific and clinical needs were effectively balanced, modeling suggested features of pragmatic trial measurement [59]:sufficient data collection, low setting burden, local clinical applicability, and opportunity to…	Serial training outcome assessments to sutain the CM intervention while balancing scientific and clinic needs ideally through sufficient data collection, low setting burden, local clinical applicability, and opportunity to show sensitivity to change was critical to assure adequate staff preparation for implementation.		Psychological capability	Behavioral Regulation	Training, Enablement	Guidelines, Service provision, Regulation
54	Becker 2021		[Adaptations to prize draw mechanisms to fit the new context] innovative workflow adaptations included changes to the traditional prize draw process. One leader indicated that their program would have counselors conduct the draws with gloves on behind a window.	Staff adaptability and innovative workflow changes to the incentive administration processes in the face of contextual changes i.e COVID-19 balancing safety.		Psychological capability	Behavioral Regulation	Training	Guidelines, Service provision	So we pick it like in front of them, with a barrier, they’re far away, with their mask- and just say okay, one. I think that will be the best because they are going to have to come in —they’re coming in to get their medication no matter what. So I think if they come in, there will be the counselors with gloves and standing —yup. That’s how we’re going to do it.
57	Green 2023		[ initial implementation -ongoing training and technical support] the ongoing TTA structure allowed for them to learn from fellow sites in monthly check-in calls. Site staff reported how these calls allowed them to reflect on the emerging nature of their program among their peers, with input from experts. The learning community model supported sites in moving to full implementation and participan…	Comminity training model included ongoing training programme and learnings from fellow sites in monthly check-in calls with inputs from experts to supportsites moveing to full implementation.		Psychological capability	Skills	Training	Guidelines, Service provision	"There wasn’t really any formal training before. It was kind of a hodgepodge of CBT, motivational interviewing, things that have some empirical support"
59	Cohen 2023	Cohen 2023	[ Objective results, monitoring and importance of frequent visits] patient participants reported that seeing the objective results about their alcohol use promoted their motivation to change their drinking. Among patients who completed the Participant Satisfaction Survey, 87% felt that this monitoring helped their treatment. also, patient participants and staff considered the visit frequency of e…	Clients access to their objective results allowed self-monitoring and ( alcohol use) promted behaviour change. Frequent visits also helped procrosiantors and clients to keep track of their efforts and regulate habits.		Psychological capability	Behavioral Regulation	Enablement	Service provision	RC “When you ask and you go through the assessment like how many times have you been in other programs like SARP [Substance Abuse Recovery Program] and some of my patients would tell me like 10, you know. And then going through the contingency management they were like this is the first like program that’s actually helped me realize what I’ve been doing as far as taking in my drinking and stuff.”…
61	Hallgren 2023		Random testing and readily available results to verify Quit Status and a sense of "accountability") The Random testing provided a sense of accountability which encourgaged patients to stay clean, also t were test result obtained in real time and test kits was also used to identify contaminants	Random testing to prove quit status provided a sense of accountability which encourgaged patients to stay clean.		Psychological capability	Behavioral Regulation	Enablement	Service provision
62	DePhilippis 2023		[Training and enhancing CM knoweledge and expert-guidance in design] The primary objectives of the training were to ensure an understanding of principles underlying CM, provide evidence of the efficacy of CM, assist participants in implementing a CM protocol that would be acceptable and feasible in their setting, and practice delivery of CM. This training significantly increased CM-related knowle…	Staff training to ensure an understanding of principles underlying CM, provide evidence of CM efficacy, assist participants in implementing an acceptable/feasible in their setting, and practice delivery of CM which significantly increased CM-related knowledge, reduced perceived barriers to CM implementation, and increased positive impressions of CM. Expert guidance to design the incentive protcol…	Significant	Psychological capability	Knowledge	Education	Guidelines, Communication/marketing, Service provision
62	DePhilippis 2023		[ structured planning, ongoing monitoring, and coaching] Following the in-person training, staff who were going to be implementing CM participated in pre-implementation planning calls provided for 12 months. CM. Once programs started enrolling Veterans in CM, a series of post-implementation coaching calls were conducted, with four in the first six months following enrollment of the firs CM patien…	Post-implementation coaching calls as mechanisms to support, guide, and adjust implementation process over time.		Psychological capability	Behavioral Regulation	Training, Enablement	Guidelines, Service provision, Regulation
64	Jakubowski 2024		[Use of a framework to giude implementation faciliatation] Use of the IFASIS to guide facilitation sessions enabled a customized approach to selecting implementation strategies. For instance, Site 103 identified leadership commitment to the implementation, funding for the implementation, and organization-level policies as important barriers to implementing the digital CM platform. The facilitator…	Use of implementation framework/theories (IFASIS) to guide facilitation sessions enabled site- monitoring, regulation and a customized approach to selecting implementation strategies		Psychological capability	Behavioral Regulation	Education, Training	Guidelines
65	Smoker 2025		[Workshops to enhance knowledge] post-workshop responses from participating providers/staff indicated that it was well received, likely impacted beliefs (e.g., decreased CMBQ training-related barriers), and may have contributed to increased CM knowledge. Additionally, the one-day workshop was recorded and available for new hires, but requiring new hires to undergo the training (i.e., watching wor…	Staff workshops, resources and onoging training to undergoo training to build and sustain understanding of CM and influence potential prejudices .		Psychological capability	Knowledge	Education
65	Smoker 2025		[Intergating Provider-client experience in implementation]Lastly, the inclusion of client perceptions of provider CM behavior was a novel and important facet of the implementation project. Other fidelity monitoring strategies such as review of session audio recordings are challenging and time intensive to collect and code, and some clients may have concerns around confidentiality. The simple, qui…	The inclusion of client perceptions of provider CM behavior (client experience) as a fidelity monitoring strategy to guide quality improvement, technical assistance efforts, as it and identify any potential gaps in client understanding		Psychological capability	Behavioral Regulation	Enablement	Regulation
66	Research Triangle Institute and National Academy for State Health Policy 2017		[Flexibility, adaptability, partnership buy-in and integration ] States addressed implementation delays and program challenges with flexibility, by implementing numerous program changes, and by continuously evolving their programs.	Flexibility and adaptability in the face of delays and programme challenges by implementing numerous program changes, and by continuously evolving their programs.		Psychological capability	Behavioral Regulation	Training, Enablement	Guidelines, Service provision, Regulation
66	Research Triangle Institute and National Academy for State Health Policy 2017		[Hiring and Training Appropriate Staff] Having the right number of staff with the appropriate skill set was critical for MIPCD program implementation progress. To adequately train staff, States used a wide range of training techniques, such as job shadowing, multiday educational trainings, peer-to-peer learning by pairing staff together, and weekly training meetings.	Staff with the appropriate skill set and those familiar with mas critical for implementation progress as states used a wide range of training techniques, such as job shadowing, multiday educational trainings, peer-to-peer learning by pairing staff together, and weekly training meetings.		Psychological capability	Skills	Training	Service provision

## Sheet: CH Barriers- Opportunity
Study ID	Author, year	Topic Area	Barrier	Barrier (summary)	Severity	COM-B	TDF	Intervention functions	Policy Categories	Quote
1	Lutge 2014		[Logistical challenges: vouchers supply and administration, delays and extra costs imposed on patients] Vouchers not always available to be distributed for patients on their appointed clinic dates. Vouchers were sometimes not available because they had not been delivered on time to the clinic by investigators. Although the investigators visited the participating clinics every four to six weeks, c…	Vouchers were not consistently available at clinics due to delayed deliveries and communication gaps, causing some patients to leave without receiving them. As a result, patients—especially those who were poor, working, or ill—faced additional burdens when required to return for vouchers, potentially limiting their ability to participate in the program.	Moderate	Physical opportunity	Environmental context and resources	Environmental restructuring, Enablement	Environmental/social planning, Service provision	‘Sometimes it happens that you come for the voucher and find there are no vouchers. They say come on the following or the third day’
2	Wingfield 2015		[Incentive approach restrictions based on resource limitations] The optimal cash transfer size is likely to depend on the intervention setting and proposed outcomes of the intervention. It is noteworthy that the strategy we adopted in this research was a “costs-mitigation” rather than a “poverty-reduction” strategy and involved a cash transfer amount that were appropriate and feasible for the loc…	Local resource constrraints dictating incentive size/approach, i.e cost mitigation rather than poverty reduction using a transfer amount that was feasible acknowledging that broader alleviation would require more extensive support . Logistical challenges faced using bank as the primary incentive delivery method with limited accessibility , delays in issuing the incentive and additional "hidden" c…		Physical opportunity	Environmental context and resources	Environmental restructuring	Guidelines, Environmental/social planning, Service provision	“We don’t fully understand the demographic differences and challenges between the urban and peri-urban communities” [CRESIPT Project Investigator] “Conditions are appropriate but you need to provide additional support to those people who find it harder to meet those conditions” [Ex-TB Patient Civil Society Representative]
2	Wingfield 2015		[Stigma and Social deterrence] IInitially, first utilised bank had limited geographical accessibility, inconsisents "in branch" information and hidden fees, stigimitazing bank staff to patienst (not due to giagnosis it was anonmyous) [ Incentive strucutre do not tailor to complex population needs leading to participation declien: Distrust of authorities and social stigma] “High risk” patients in …	Stigmatising bank staff to patients leading to deterrance of utilisation of service/ Incentive strucutre do not tailor to complex population needs leading to participation decline and Patients distrust of institutions, fear of being associated with government or law enforcement ( paritcularly those formerly-incarcerated, drug- or alcohol-dependent and gang members) . .and stigma within households…		Social opportunity	Social influences	Restriction, Environmental restructuring, Enablement	Guidelines, Regulation, Environmental/social planning, Service provision	“Some patients would never open a bank account because they don’t want to register their name” [CRESIPT Project Nurse]
3	Patel 2019		[Technical challenges] initial months after launch of DBT scheme, the main challenge was nikshay software itself, which had many issues such as frequent changes to the software format, slow processing and data mismatch. There were issues in the PFMS portal also. Initially, there were some errors in linkage between nikshay and PFMS necessitating manual preparation of beneficiary list from PFMS. Th…	Tehcnical challenges related to the incentive portal/software leading to errors in linking datasets, slow processing, data mismatch and added work budrden to manually prepare lists of beneficiarlys leading to transfer delays and trakcing issues. Lack of grassroot workers and compulsory notification of TB cases to government in the private sectore leading to limited linkage/referral of patients an…	significant	Physical opportunity	Environmental context and resources	Environmental restructuring, Enablement	Environmental/social planning, Service provision	"The bank account details of the patient that we were entering were not reflecting in nikshay software. Due to that, there was almost nil DBT payment in the initial months." "… we have to sit for preparation of manual list. The day when we sit can be any day when we are comparatively free from other work. Therefore, there is a chance of delay in payment." ""Though they [private doctors] have to n…
6	Verma 2024		[Complexity/ lengthy of DBT procedure and delays] Respondents faced delay in receiving the amount due to errors in software, non-availability of documents to open accounts. [Work burden and Coordination of patients flow and inter-facility gaps] There was work burden (paperwork and multiple levels of approval). Patients that are being transferred out are not easily being accepted by the staff henc…	Lenghty processes for approval of the incentive, rigid software processing and technological challenges i.eI f one participant have wrong information, patch is rejected leading to delays in incentive tranfer and high work burden on staff (paper work and mulitple levels of approval) Bank accessibility barriers due to various factors limiting eligibile patients e.g. lack of bank accounts (espicaial…		Physical opportunity	Environmental context and resources	Environmental restructuring, Enablement	Guidelines, Environmental/social planning, Service provision	“After my approval it goes to the accountant and then PFMS processing, following which a print is sent to me for cross checking for any problem. My signature, followed by signature of accountant, City TB Officers (CTO) and Medical Officer of Health (MOH) it goes back to bank. This lengthy is the process.” “I receive a batch of 100 patients from Nikshay software and if even one patient faces a pro…
6	Verma 2024		[Stigma of being a TB patient]	Stigma associated with TB patients leading to some avoiding the service		Social opportunity	Social influences	Environmental restructuring Modelling	Communication/marketing, Enviornmental/social planning	“Some prefer to stay away from such patients.”
7	Mohan 2024		[Banking issues] PwTB who do not possess individual bank accounts cannot receive NPY benefits. The same account cannot be used again if a patient suffers more than one TB episode. Thus, many beneficiaries are required to open new bank accounts to be enrolled in NPY. There were also instances where the PFMS does not accept the accounts of local banks like the Grameen (Village) or the Cooperative B…	Bank-related challenges: beneficiaries without individual accounts or those using local banks face rejections, forcing them to open new accounts. Geographical barriers in remote areas (mostly tribes) hinder access to banks and health facilities due to poor infrastructure, while technical issues e.g. unreliable internet and Ni-kshay portal downtime delay payments. The approval process is cumbersom…		Physical opportunity	Environmental context and resources	Environmental restructuring, Enablement	Guidelines,Regulation, Environmental/social planning, Service provision	"I feel bank account opening is the major problem. Patients do not have bank accounts most of the time and they need to spend a lot of time, money and effort to open the accounts. We are helping them start bank accounts, but some of them don’t even have ration cards and forget Aadhar cards. So, then we have to start there."- Field level NTEP staff "Travel is an issue here. As you saw, the roads a…
7	Mohan 2024		[Cultural alienation from banking concenpts: intervention incongurrent with reality] In several ethnic groups, the concept of "banking" itself is alien, which makes it difficult for health workers to convince them regarding the importance of opening bank accounts for NPY.	Cultural alienation from banking concepts renderring the intervention incougrrent with some groups reality		Social opportunity	Social influences	Environmental restructuring Enablement	Environmnetal/social planning, Service provision
8	Chadhar 2025		[ Eligibility challenges due to: Non-availability/dormancy of bank accounts, and delays due to banking or administrative procedures] Several barriers were identified during the study. These included the non-availability of bank accounts, difficulties in providing accurate bank details, and dormant accounts due to inactivity. Another significant barrier arose from the recent merging of banks, whic…	Eligibility issues due to non-availability, dormancy, or inaccuracies in beneficiaries' bank accounts, further complicated by recent bank mergers. Delays in incentive disbursement , primarily due to system inefficiencies such as de-duplication of IDs, prolonged bank detail verification, and poor coordination between banking and administrative systems, leading to untimely and inconsistent payments…		Physical opportunity	Environmental context and resources	Environmental restructuring, Enablement	Guidelines, Regulation, , Environmental/social planning, Service provision	“When the banks were merged, it took time for people to receive their money. Many patients provide wrong account numbers or dormant account numbers, then they do not receive their money, and many don't check their bank statements at all.” -Senior treatment supervisor, Tuberculosis unit. "The lab technician created a Nikshay ID, then the doctor initiated the treatment and created another Nikshay I…
9	Kim 2012		[Outreach activities challenges] raising awarness of all employees about the intervention was a challenge. Specifically, LHCs thought it was difficult to reach hourly employees and that competing health programs (eg, Weight WatchersTM) might have hindered participation [ Working evironment incourrguent with programme] time constraints, and stress. Working in stressful, constantly changing, and in…	Difficulties in conducting outreach activities due to diversity of employee types e.g. hourly workers, and competition from other health programs. Workplace environmental factors like time constraints, high stress levels, unpredictable schedules, and staff turnover further hindered participation, as these structural issues were beyond the scope of financial incentives. Additionally, limited admin…	Minor	Physical opportunity	Environmental context and resources	Environmental restructuring, Enablement	Environmental/social planning, Service provision
10	Allan 2012		[Stigma by associateion and delievery settings] The delivery timing of Quit4u also risked damaging self-identity through another means. In some pharmacies , incentive delivery was coincided with the distribution of methadone. Some feared being recognized in a queue associated with drug addicts, particularly in ethnic communities.	Stigma by association and risks of damadging self-identity as incentive distribution setting included other stigmatised populations e.g. drug addicts	significant	Social opportunity	Social influences	Environmental restructuring, Enablement, Modelling	Communication/marketing, Enviornmental/social planning	“I mean, well, standing in the queue was bad for a start but then the people that are standing along in the queue are not normal. They, the junkies, are totally out of this world I think and emm, some of them just start speaking to you and like you don’t even know them. That was one of the things that put me off.”
10	Allan 2012		[ inconvenient Programme structure does not fit all] Participants raised concerns over structural aspects of the programme and inconvenience related to location, timing and time taken to be monitored. . Such issues appeared to be of greater concern and inconvenience for those with a disability or with childcare responsibilities. N.B: Locality of monitoring, individual/peer meetings, paperwork and…	Programme structure challenges including inconvenient locations, timing, and lengthy procedures, which disproportionately affected participants with disabilities or childcare responsibilities. Issues such as conflicting schedules (work hours, meal times) and the variability of individual tolerance for inconvenience further hindered participation. Additionally, privacy breaches emerged as a signif…		Physical opportunity	Environmental context and resources	Environmental restructuring	Environmental/social planning	“with it being away in ***street, there is that many things happening there as well, it’s always in the back of your mind. Not that anyone would think of attacking me but you just never ken”. “First, it was a bad time at 4 o’clock because they work and I look after the grandchildren, you know, after school which was a bad time and then with me being deaf." “You are standing in the shop and people…
11	McKell 2013		[ High workload on cessation advisors and limited capacity] for all provders. It was widely accepted by respondents in the NSPS that the study added significantly to workloads, especially in terms of time demands. It was acknowledged that advisors already had a heavy workload, aiming to bring in five 5 clients a week, which meant an case load of up to 40 clients. The extra demands were identified…	The study placed a high burden on cessation advisors, exacerbating their already heavy caseloads y requiring extended client interactions, meticulous data collection, and real-time record updates—particularly challenging during drop-in appointments where additional CO monitoring was often needed. Staffing shortages emerged as workloads increased, with research nurse/advisors struggling to balance…	significant	Physical opportunity	Environmental context and resources	Training, Environmental restructuring, Enablement	Guidelines, Environmental/social planning, Service provision
12	Shields 2016		[inappropriate recruitment methods for a special population] the challenge of recruitment methods not working well and that there is high loss to follow up.=From the survey, it was concluded that Ma¯ori and Pacific women are willing to take part, but they needed to be recruited via direct approaches rather than through health services. [misalignment of programme requirments and providers capacity…	Ineffective recruitment methods for Māori and Pacific women, who required direct outreach rather than health service-based approaches to reduce high loss-to-follow-up rates. Significant misalignment between program requirements and provider capacity, with teams struggling to meet demands for frequent visits, group sessions, and extensive outreach coverage due to resource constraints. These system…		Physical opportunity	Environmental context and resources	Environmental restructuring, Enablement	Environmental/social planning, Service provision
13	Passey 2018		[Staffing shortage and turnover : no capacity for implmentation] Although the AMIHS teams valued the program, they also found it challenging to implement without additional team capacity. One site withdrew because unrelated staffing issues meant they could not implement the program, and another site struggled to implement it fully because there was no AHW for most of the study period The group pr…	Saffing constraints, with one site withdrawing due to workforce shortages and another operating without an Aboriginal Health Worker (AHW) for most of the study period. High turnover necessitated duplicate training, while only one fully-staffed site could implement all components. The intensive first 3-week visit requirement proved challenging given large travel distances in remote areas. While gr…	significant	Physical opportunity	Environmental context and resources	Environmental restructuring, Enablement	Environmental/social planning, Service provision
14	Smoking in Pregnancy Challenge Group 2019		[ low recruitment rate due to lacking infrastructure processes in place] A scheme implemented by one council in England, to promote both breastfeeding and stopping smoking among young pregnant women struggled with recruitment. having just two women enrolled in the smoking element of the scheme. This highlights the need to have partners across the maternal health system who can promote the scheme …	Low Recruitment due to limited partnerships across maternal health services to effectively identify and engage eligible women. Program Design & Eligibility Issues: The scheme’s broad eligibility criteria—unlike others targeting specific high-risk groups (e.g., by deprivation or age)—may have diluted its impact. Notably, women from more deprived backgrounds, even when eligible, were less likely to…	significant	Physical opportunity	Environmental context and resources	Environmental restructuring	Guidelines, Regulation Environmental/social planning
15	Apata 2019		[Logistical issues to venues of intervention administation and groups out of control] Among the logistical challenges they faced, the lack of a CEASE central venue that could provide stability for the program was reported as a critical issue. Sometimes, due to unforeseen circumstances, groups were displaced from their regular meeting spaces in community venues. [One-sided partnership: Lack of str…	Logistical Instability: Lack of a dedicated central venue disrupted program continuity, with groups frequently displaced from community spaces due to unforeseen circumstances. Partnership & Communication Gaps: Poorly defined roles and absence of a single point of contact created confusion for Community Site Coordinators Limited access to participant progress data left some Coordinators feeling ex…		Physical opportunity	Environmental context and resources	Environmental restructuring	Guidelines, Regulation, Environmental/social planning,	“It’s a little strenuous on the organization because they are using the space for no money, so that kind of limits income and we could use income.” . “I think at the end of the program, I didn’t even know the number of people that were signing up in the program. I didn’t know how many people finished, how many dropped out. I heard that the program was a success, but I didn’t have any hard numbers…
16	Joyce 2021		[Technological/infrastructure barriers] Participants reported issues with their watch battery life and frequently stated that the watch was not holding a charge long enough for it to pick up cigarette use Participants were given instructions to charge the watch overnight to maximize their battery life. (pilot 1) Participants reported various reasons for not wearing the watch, including being unab…	Technological/Infrastructure Challenges: Smartwatch battery limitations (insufficient charge duration for reliable monitoring) hindered data collection, despite charging instructions. Low adherence to wearables due to pre-existing population-Specific Structural Barriers/ occupational constraints (e.g., (e.g., unstable routines, limited bandwidth for tech engagemen and safety concerns (e.g., aroun…	Minor	Physical opportunity	Environmental context and resources	Environmental restructuring	Environmental/social planning
17	Too 2021		[ CO Validation services site and data capture] Initially, capturing the CO for women at both the 4 and 12-week time points was through pharmacy services with support from the Public Health-Health Improvement Pharmacy team. This brought some data capture challenges and increased administration. By the time of the study period (January-June 2019), clients attended the pregnancy SSS to establish CO…	CO Validation: Shifting from pharmacy-based CO validation test introuduced data capture challnges and added initial administrative burdens. Incentive Administration including payment processing strained service capacity, and was time intensive.		Physical opportunity	Environmental context and resources	Environmental restructuring, Enablement	Environmental/social planning, Service provision
18	Breunis 2023		[Un expected exernal events: COVID-19 Disrubtion] The pandemmic has brought about challenges and changes to initial implementation protocool. During the first two waves of the COVID-19 pandemic (March to May 2020 and November 2020 to March 2021) home visits were not possible according to Erasmus MC policy and were temporarily replaced with a second phone call. During the two COVID-19 waves no bio…	COVID-19 Disruptions: Home visits were suspended during pandemic waves and replaced by phone calls. Biochemical validation was halted, relying instead on self-reported abstinence. Ineffective Recruitment: Physical ads (posters/flyers) in waiting rooms failed to attract participants. Poor Information Quality: Online platform content was poorly tailored, unrealistic, and demotivating for users.		Physical opportunity	Environmental context and resources	Environmental restructuring	Environmental/social planning
18	Breunis 2023		[Group incentives and peer pressure] Group incentive was not motivational, increases (negative) group pressure	Group incentives created negative peer pressure and perceptions of inequity.		Social opportunity	Social influences	Environmental restructuring	Environmnetal/social planning
19	Yon 2024		[Programme structure and target population needs] Frequency of visits required by the intervention was a barrier to the women due to time and transportation constraints. [Staff Hiring challenges] To tailor to women need, home visits were offered but delays in staff hiring were an obstacle. [Limited interactions due to unexpected external events] COVID-19 pandemic restrictions: offices closed and/…	Program Design vs. Real-World Constraints : Rigorous visit frequency clashed with participants' time/transport limitations.Home-visit staffing delays hindered providing support. Pandemic Disruptions: COVID-19 closures forced outdoor drive-through testing and reduced counseling quality. Systemic Integration Failures: Loss of institutional champions (RRMC/RWH) undermined sustainability. Training al…		Physical opportunity	Environmental context and resources	Training, Environmental restructuring, Enablement	Guidelines, Environmental/social planning, Service provision
20	Tranby 2025		[Technical challenges using the app] Participants reported disconnecting from the intervent before test photos had finished uploading. One participant lost a test kit before the 6-month check-in, was mailed a replacement, and had the completion window extended by three days to allow for shipping. Technical difficulties with the Vincere Health portal and app included: study staff login challenges,…	Technical Challenges: App connectivity issues caused premature disconnections during test uploads. Portal problems included staff login difficulties, missing identity photos (50% of check-ins), and cotinine test upload failures. Incentive Delivery Delays: Direct deposit setup caused payment lags, reducing immediate reinforcement. Prepaid card distribution faced delays due to: Staff procurement di…		Physical opportunity	Environmental context and resources	Training, Environmental restructuring	Guidelines, Environmental/social planning, Service provision
21	Green 2017		[Admin burden: FI strurcture incongurrent with clinical care] The main challenges to acceptability for investigators and staff were related to implementation issues; the primary one being the requirement for quarterly viral load tests to qualify for financial incentives in the study and consequent burden and overload. such requirement did not always align with clinical care at some sites, particu…	FI Structure vs Clinical Care Mismatch: Mandatory quarterly viral load tests for incentives created administrative overload, especially for stable patients not requiring frequent monitoring. While some saw improved care engagement, others noted disruptions to clinic flow and added staff burdens. High-volume clinics reported significant added administrative strain despite efforts to streamline wor…		Physical opportunity	Environmental context and resources	Environmental restructuring, Enablement	Environmental/social planning, Service provision	“We experienced significantly higher patient volume because patients were showing up for their visits and also were wanting to be rescheduled every three months, whereas otherwise they might have begged and pleaded for four month visits or six month visits or even not have scheduled right away when they left the clinic at a previous appointment. So it was a challenge for us to deal with a steadie…
22	Shelus 2018		[ Misalignment of Coupouns disbursment with clinic workflow and patient needs challenges] : While HIV test sites were allowed some flexibility to integrate the intervention into their current standard of care, the study required test sites to provide the coupon on the same day as providing the HIV-positive test result to maximize the potential to link to care. However, some staff and site investi…	Coupon-Timing Mismatch: Required same-day coupon distribution with HIV+ test results often proved impractical. That was due to multiple factos including: staff shortages, workflow disruptions, and emotional readiness for distressed patients Logistical Hurdles: Staff coordination gaps delayed FI distribution and Operational challenges included securing/storing coupons and gift cards	significant	Physical opportunity	Environmental context and resources	Environmental restructuring, Enablement	Environmental/social planning, Service provision	Some patients would be discharged without having gotten the coupon and then we would have to track them down to try to get them the coupon. . . Patients could be discharged on a Saturday or Sunday and just not have the coupon yet. Or we may not have given it to them yet for one reason or another. [Investigator] They had to coordinate. . .we have a lot of tester counselors, but only some of them w…
23	Warnock 2025		[Pre-existing structural/systemic challenges to users engagement in PrEP care] Site leaders, PrEP navigators, and research coordinators identified several challenges to engage PWID in PrEP care, primarily due to competing service priorities such as housing and emotional needs. Housing instability was a particularly significant barrier. Site leaders emphasized the impact of housing insecurity on P…	Structural Barriers: Competing Service priorities (housing instability, emotional needs) of clients overshadowed PrEP engagement. Crackdowns on homeless encampments further reduced willingness to participate in on-site services. Post-COVID Staffing Shortages: Understaffing (e.g., PrEP navigators) hindered research implementation and sustainability.		Physical opportunity	Environmental context and resources	Environmental restructuring, Enablement	Environmental/social planning, Service provision	One research coordinator highlighted the difficulties faced by unhoused PWID during the fentanyl era of the U.S. overdose crisis: “For a lot of folks, it’s [PrEP] not their priority. And frankly, should it be if they’re unhoused and dealing with fentanyl and all of these things are happening.” Another research coordinator described the challenge of addressing PrEP with PWID frequently experiencin…
23	Warnock 2025		[Burnout from unmet support needs and dissconect between leadership enthusaism and onground reality] One site leader highlighted the potential disconnect between leadership’s enthusiasm for research and the and the staff’s capacity to handle additional responsibilities in the aftermath of the COVID-19 pandem	Leadership enthusiasm contrasts with staff perceptions,Staff feel emotionally responsible for clients but unsupported themselves. Importance of regular check-ins and support from leadership.		Social opportunity	Social influences	Environmental restructuring, Enablement	Environmnetal/social planning, Service provision	"... So, I think when I, as leadership, hear about a research study, I’m all excited but when you present it to staff, not so much. They see just another thing they have to do.” “I think ‘burnout’ is the word, right? And I think part of that is we’re all holding stuff for clients, right? But who’s holding stuff for us?” PrEP navigator 1: “That’s why all my participants, they know I’m stretched al…
24	Wagner 2025		[ Preexisting social and structural issues: app/intervention incongurrent with users reality] Several YWH reported that setting a consistent time in the app for reminders was difficult when they did not have a consistent daily routine. One provider also noted that the intervention did not address some of the underlying social and structural issues (mental health, stable housing, substance use) th…	Preexisting Social/Structural Issues: Users struggled with inconsistent routines, making reminder features less effective. Providers noted that the app did not address key barriers like mental health, housing instability, and substance use, which impact adherence. Technological Challenges: The app not functioning properly e.g Erroneous reminders persisted even after medication logging and Video-r…		Physical opportunity	Environmental context and resources	Environmental restructuring, Enablement	Environmental/social planning, Service provision	“The biggest barrier to adherence, at least what I am seeing, is patients with social issues. If you are struggling with housing… I think it is really difficult to take a daily pill. You may not even have your pills with you all the time, so I don’t know if this [aDOT app] will be helpful” (Provider, 28 years old, Asian, California). “The only concerns I did have were some privacy concerns. You k…
25	Powell-Jackson 2009		[Deviations from the scheme policies and variations in the interpretation of the eligibility criteria and the administration of the cash] There were numerous practices in the implementation of the conditional cash transfer to the women. There were variations in the interpretation of the eligibility criteria and the administration of the cash. The former included cases where health facilities simp…	Deviations from Policy & Inconsistent Administration: Eligibility Misinterpretation where some facilities ignored criteria, giving cash to all women (even home deliveries). Payment Variability where: Amounts, recipients (e.g., delayed payments, no payment), and timing differed. Health Worker Incentives where unclear sharing guidlines led to non-staff (e.g., accountants) receiving funds. Reimburse…		Physical opportunity	Environmental context and resources	Training, Restriction, Environmental restructuring	Guidelines, Regulation, Environmental/social planning, Service provision	"As the incentive is given for transportation expenses it should be given on time." "In my opinion, the incentive should be given to the woman immediately after she delivers...if she does not get the money in her hand she may not be able to borrow and then she will face problems." "We sometimes feel that this scheme should be stopped. Either the money should arrive on time otherwise itt does not …
25	Powell-Jackson 2009		[gender power dynamics influencing implementation] The practice of giving cash to husbands was a particular concern to some respondents who were worried that the money might be misspent. [[Bureaucratic delays in incentive disbursementTop-Down cotrol stifled local ownership] ; Moreover, efforts by the central level to retain substantial control of the implementation process – by using an earmarked…	Cutural (gender norms) impacting misspending of incentives. Central level stakeholders retaining control over implementation processess with little opportunity of feedback excerbated problems/low uptake		Social opportunity	Social influences	Restriction, Environmental restructuring, Enablement	Guidelines, Regulation, Environmental/social planning, Service provision
26	Lama 2014		[Economic barriers to service use/ target behaviour and limitations of public maternal services ] Unemployment and financiall barriers resulting in limitations to achieve institutional delivery and seeking formal care . Hence, women from low economic status for not availing the services. Despite the incentive scheme, Health centers lack adequate facilities imaging, basic medicines so they are ref…	Pre-existing structural barriers: Poverty & Unemployment prevent many women, especially those from low-income backgrounds, from accessing institutional delivery and formal maternal care services. Inadequate Public Health Facilities lack essential resources (e.g., imaging, basic medicines), forcing referrals to other centers and incurring extra costs (e.g., transportation). Financial Strain and as…		Physical opportunity	Environmental context and resources	Environmental restructuring, Enablement	Environmental/social planning, Service provision	“Even though the services provided in health centers are free, the cost of transportation and other expenses are high, so people cannot afford to bear the extra costs. Therefore I think most of the women from remote villages are deprived of services because of lack of money”. “Although hospitals provide some money for check up and delivery, it is not enough. People cannot afford to pay the person…
26	Lama 2014		[Social and cultural norms misalign with scheme target behaviour] Women are forced to deliver at home /cow shed. For example, naming cermemony which forbids her from going out postnatally for a period of time so cannot go for postnatal checks. There is also a common theme reported by participant groups of prevelant Illetracy and limited awarness, shyness and stigma of exposing their body parts to…	Social and cultural norms e.g. home confinement during birth mislaignements with target behaviour e.g. institutianal care/delivery	significant	Social opportunity	Social influences	Restriction, Environmental restructuring, Enablement, modelling	Guidelines, Regulation, Environmental/social planning, Service provision. Communication/marketing	. "cost to reach there is high. I do not want to put burden to my family. So whatever they say I have to obey”.
27	Sidney 2016		[ Procedural difficulites in incentive reciept and delays] Most described difficulties in obtaining the cash incentive. Participants reported several issues including procedural hurdles of opening a bank account to deposit the check and being instructed to come back to the health facility [ Context and accessibility]:These women were not able to participate due to circumstances outside of their c…	Procedural Difficulties in Receiving Incentives: Women faced administrative hurdles, such as needing to open a bank account to receive payments. Many were told to return to the health facility later, creating delays and inconvenience. Accessibility & Logistical Challenges: Unpredictable Labor: Over half of the women delivered too quickly to arrange transport. Lack of available ASHA workers (gover…	significant	Physical opportunity	Environmental context and resources	Environmental restructuring, Enablement	Environmental/social planning, Service provision	I planned to deliver in the hospital…When the pain started it was raining heavily. When I told my parents about the pain, they called the [free emergency transport] vehicle but they were not able to get through because of the heavy rains…We were planning to go to the hospital but the baby came out very quickly.” – District 2 Non-JSY Participant (Home Delivery), Age 22 During the day I can go alon…
27	Sidney 2016		[Powerlessness- Shift in relationships] The women knew that the hospital staff was not supposed to ask for money but they felt powerless to refuse to pay for fear of not receiving ‘proper’ care.	Powerlessness of target client infront of hospita staff (power dynamic) to refuse to pay and not receiving proper care		Social opportunity	Social influences	Restriction, Environmental restructuring, Enablement	Guidelines, Regulation, Environmental/social planning, Service provision
28	Gupta 2018		[Limited preparedness of facilities due to preexisting systematic and structural barriers] Comprimsed the facilities abilitites to provide expected services for birth and birth complications which led to low uptake of the programme. The limited availability of specialized doctors and competent nurses, resources and infrastructure, even more in rural areas, was perceived to be the foremost reason …	Health Facility Limitations & Structural Barriers: Inadequate Resources: Rural facilities lacked skilled doctors, nurses, and infrastructure, discouraging facility-based deliveries. Poor Emergency Care Capacity: Weak health systems reduced providers’ confidence in managing complications, further lowering program uptake. Persistent Issues: Despite policy reforms (e.g., JSY/NHM), systemic gaps in i…	significant	Physical opportunity	Environmental context and resources	Environmental restructuring, Enablement	Guidelines, Regulations, Environmental/social planning, Service provision	"“Doctors at government facilities can’t handle complications, and people are scared of death. Therefore they [patients] prefer to go to private hospitals for delivery.” (ASHA; Jharkhand)" “The conditions of our hospitals are not good. We need manpower, and infrastructure for better results.” (District official) “We tell people about of the benefits of going to hospitals for childbirth, but peopl…
28	Gupta 2018		[Social and Cultural norms] Decisions to seek care were reportedly influenced by several factors embedded in the social and cultural mileu. Lack of awareness about the importance of medical care during childbirth combined with preconceived beliefs of elderly people in favor of home-based childbirth, were jointly associated with a reduced uptake of the JSY. In some cases, ASHAs were unable to effe…	Social and cultural norms impacted decisions to seek care/behaviour change e.g. elderly family members belief against formal use of services for birth. Staff and providers ( rude and bribes/side-payment seeking) asking for money from clients after target behaviout is achieved dettering clients from using the services/		Social opportunity	Social influences	Restriction, Environmental restructuring, Enablement, Modelling	Guidelines, Regulation, Environmental/social planning, Service provision. Communication/marketing	“People are not considering the benefit of the JSY, some of them decide about the place of childbirthaccording to their family.” (ASHA) “Sometimes the staff at the hospitals asks for money from the patients after delivery. This makes it difficult for us [ASHA] to convince the patients towards facility-based delivery.” (ASHA; Jharkhand)
29	Baba-Ari 2018		[Cultural practices incongurrent with intended behaviour change] Cultural practices (eg, home delivery by traditional birth attendants) influenced utilization of services, irrespective of incentives. One non-beneficiary regarded utilizing available health services as a last resort in the face of complications.	Cultural practices incongurrent with intended behaviour change e.g. insitiutional delievery and regarding it as "last resoirt"		Social opportunity	Social influences	Environmental restructring, Enablement, Modelling	Environmental/social planning, Communication/marketing	“(proudly) All of us (female family members) give birth in our houses, even if I go for the ANC, I will still deliver at home because we don’t go to hospital to deliver…yes if there is problem I will go (to the PHC) but we don’t have problems...”
29	Baba-Ari 2018		[Poor Adherance to FI protocol] Misalignment with wirtten policy; contrary to the written program policy of four tranches staggered over pregnancy period, post-delivery and post-natal visits, payment was done in two tranches of unpredictable amounts totalling N5000. [Access: transportation challenges] A major a reason for non-uptake of the CCT services among was the distance from their homes, oth…	Poor Adherence to Program Protocol: Payment Delays & Irregularities: Instead of the policy-mandated four structured payments, beneficiaries received only two unpredictable installments (totaling ₦5000), undermining financial planning. Transportation Challenges: High Costs & Distance: Many women, especially non-beneficiaries, cited travel expenses and far distances as key reasons for skipping serv…		Physical opportunity	Environmental context and resources	Restriction, Environmental restructuring, Enablement	Guidelines, Regulations, Environmental/social planning, Service provision	“The first time they called me to the facility (between ANC visits) and I was given N1300, the second time they gave me N3,700 (after delivery) ...” If it wasn’t far, I would have gone but who will stay with the children when I go…nobody and I will go early in the morning, who will give them food then? They should bring another one near us in... (this village) and I will go, at least the children…
30	Contractor 2018		[Cultural misalignmnet :[Childbirth is a natural process and do not need a health facility] The tribal approach to childbirth as a normal event; this community pregnancy and childbirth is perceived as a natural process, not requiring much external intervention. The traditional birth attendant for instance mentioned that in case of prolonged labour, retained placenta or unrestrained bleeding, it i…	Cultural/tribal practices misalignment with intended behaviour change e.g. insitiutional delievery and regarding it as "last resoirt" Childbirth is a natural process and do not need a health facility Women's resistance be shaped by cultural, familial, or community norms challenged outreach workers	significant	Social opportunity	Social influences	Environmental restructring, Enablement, Modelling	Environmental/social planning, Communication/marketing, service provision
30	Contractor 2018		[Other competing prioritesand practice and the lack of Dai ] Despite the JSY and other initatives, women gave different reasons for delivering at home.Since the burden of both household work and livelihood was borne by women, they were concerned about the number of days that would be lost if they went to the hospital. Birthing at home meant that they could go back to work immediately and tend to …	Competing Priorities & Lack of Skilled Birth Attendants: Household & Livelihood Pressures where women often chose home births to avoid losing workdays and to quickly resume childcare and labor. (Gap in practice) Unattended Home Deliveries as despite JSY guidelines, no home births were assisted by skilled attendants (ANMs focused only on preventive care). Accessibility Challenges in Remote Areas: …	significant	Physical opportunity	Environmental context and resources	Environmental restructuring, Enablement	Regulation, Environmental/social planning, Service provision
31	Dickin 2022		[Technological/infrastructure failure and poor infrastructure : portal and card reader system ] challenges with portal capturing all visits and consequent substantial drop-off in automatic payment registeration. A low proportion of visits were captured as intended. In the Afya portal, 6440 of the 25 085 (26%) total registered payments were recorded automatically, indicating that the visit was rec…	Technological & Infrastructure Failures: Portal & Card Reader Issues: Only 26% of visits were automatically recorded due to hardware/software malfunctions (connectivity, battery life, slow processing). System Errors: Common problems included unresponsive card readers, incorrect name displays, and frequent error messages. Spoilt Cards: ~10% of cards (539 out of 5,488) malfunctioned, with slow repl…	significant	Physical opportunity	Environmental context and resources	Environmental restructuring, Enablement	Environmental/social planning, Service provision	‘…payment of money is taking too long and these clients were told that this is money they would be receiving every month. You find that a client has come for all the ANC visits, all the immunisation services and now the baby is 7 months with no single cent.’ Nurs " it would tell them to be very ready for this programme, because it requires a lot from them.’ "
31	Dickin 2022		[Fear of Reputational damage due to intervention failure] Nurses reported many challenges with implementation of the intervention,including inconsistent and variable success with automated payments. This impacted acceptability because nurses were viewed as the ‘face’ of the Afya CCT intervention to clients and were worried about damaging their community relationships	Nurses were vied as "face of intervention" and worried about damading their community relationships due to implementation failures.		Social opportunity	Social influences	Environmental restructring	Environmental/social planning, Service provision
31	Dickin 2022		[Professional/Social boundaries violations ] Rarely, the cash transfers introduced ethical problems for participants who were asked to buy something for healthcare staff, such as a drink. Some participants reported that the transfers changed intra-household dynamics, such asa spouse expecting a share of the money to provide transport or changing household distributions of income.	Professional/social boundaries violations i.e staff asking for money/reward in return of incentive. Influence of incentives on changing the intra-household dynamics	Minor	Social opportunity	Social influences	Restriction, Environmental restructuring, Enablement	Guidelines, Regulation, Environmental/social planning, Service provision.	‘They will tell you to give them something… that they are the ones who have made you get that money and that you should buy for them a soda or give them something small"
32	Banerjee 2025		[Staffing gap and workload: Percieved neef for dedicated PMMVY officials at the block level] Although human resources for implementation of the scheme was felt to be sufficient by the respondents, there was a perceived need for dedicated PMMVY officials at the block level. In addition, the programme implementers indicated that there was a high workload in terms of data entry related to the scheme…	Staffing Gaps & Workload Bottlenecks: Need for Dedicated Officials: While human resources were deemed sufficient, block-level dedicated PMMVY officers were requested to streamline operations High workload in portal data entry delayed cash incentives, prompting calls for dedicated data entry officers (DEOs) at PHCs. Enrollment Barriers Due to Documentation Issues: Eligibility Hurdles Many women la…		Physical opportunity	Environmental context and resources	Environmental restructuring, Enablement	Guidelines, Environmental/social planning, Service provision	A non-beneficiary woman reported “We went four or five times…I don’t know how many times I have applied for name change in Aadhaar card, still it has not been done” A block level official reported, “Mismatching of beneficiary’s name in Aadhar card with bank account, resulted in difficulties for getting money in the bank account of beneficiaries. When we feed the form in the software, due to this …
33	Payne 2013		[Limited of resources as barrier for maximum provider prarticipation] Before 2010, lack of resources to purchase and operate wireless EBT terminals was a major barrier to maximum farmers’ market participation. S: during the 2010 season, a USDA grant allowed all DPHO markets to obtain EBT terminals. In addition, mini-grants from the DOHMH supported staff at smaller markets to operate EBT terminals…	Resource Limitations for Provider Participation: Lack of funding for wireless EBT terminals limited farmers' market participation in food assistance programs. System Design & Fraud Prevention Challenges: Coupon tracking lacked individual-level tracking. Manual monthly reports from markets/CBOs caused delays in monitoring. Also, smooth coupon texture made counting time-consuming and error-prone. C…		Physical opportunity	Environmental context and resources	Environmental restructuring, Enablement	Guidelines, Regulation Environmental/social planning, Fiscal measures, Service provision
34	Brown 2019		[Contextual challenges to change] Community members described facing many challenges to healthy eating including high food costs and limited available money to spend on healthy food. Although the HCR program was valued and seen to encourage fruit and vegetable consumption, it was not enough to alleviate the high cost of food. [Preexisting structual and systemic challenges to deliver the intervent…	Persistent Pre-existing Barriers to Healthy Eating: Despite the HCR program's benefits, many still struggled with the high price of fresh produceNo fridges or proper storage limited healthy food access. Delayed shipments and poor-quality fruits/vegetables discouraged consumption. Voucher Redemption Challenges at Stores: Stores faced long queues, making it hard to process vouchers efficiently amid…		Physical opportunity	Environmental context and resources	Training, Environmental restructuring, Enablement	Guidelines, Environmental/social planning, Fiscal measures, Service provision	“It was really good.It encourages people to get more fruit and vegetables. AUD $10 doesn’t get you much, but it’s good”. “It’s expensive here, there is hardly enough money to buy food”. “AUD $10 only gets you two or three fruit and vegetables because of costings of the shop”.
35	Garner 2020		SU: [ Limited program communication and awarness ] A strong and consistent point of dissatisfaction and the focus of multiple suggestions was insufficient program communication. Participants relied on word of mouth for program information and could not find program details even after becoming aware of its existence: I had trouble finding out about it. Participants felt ill-informed because of a p…	Poor Program Communication & Awareness: Lack of Clear Information as participants struggled to find details about the program, relying mostly on word-of-mouth. Many felt ill-informed due to unclear instructions on how to use benefits and minimal outreach efforts. Accessibility & Convenience Issues: Market Location & Timing: Some found it difficult to visit due to limited parking (expensive or una…		Physical opportunity	Environmental context and resources	Environmental restructuring	Environmental/social planning, Fiscal measures	I went online to see, because we have a family of 4, so getting to the farmers’ market without being sure … So, for us, we heard of it word of mouth. I couldn’t find more information when I looked for it. (New York) , "I didn’t even know that there was a farmers’ market [until] late last year, and it was like right before it kind of shut down for the season, and it was, like, well, that was a bum…
36	Masci 2020		[Stigma] Individual level barriers cont: stigma related to using SNAP	Stigma experienced due to using SNAP		Social opportunity	Social influences	Environmental restructring, Enablement, Modelling	Environmental/social planning, Communication/marketing
36	Masci 2020		[Hampered benefit due to accessibility challenges] little benefit due to shortage of benefits/ accessibility among other issues.3) not being able to use the full benefit because of inability to transport or store produce. [Operational structure and limited resources] Schedule and frequencey of programme operations and inadeuqate resources relative to demand. The most common were 1) limited hours/…	Hampered Benefit Due to Accessibility Issues: Many participants saw little benefit due to constant shortage of tokens/benefits and inability to transport or store produce (limiting full use of incentives) Operational & Structural Challenges: Restricted access due to infrequent market locations/schedules. Kiosks frequently ran out of tokents leading to delayed utilisation of incentives. Crowds and…		Physical opportunity	Environmental context and resources	Environmental restructuring	Environmental/social planning, Fiscal measures	"We have the farm market on Saturdays from 9:00 to 1:00, so I can’t go back during the week and if I happen to. . . missed the farmers market then I missed my opportunity. . ." “I have an injury on my leg and I can’t walk. I couldn’t even park at that place [FM], it was so busy.”
37	Gusto 2020		[Logistical barriers to programme administeration : Bureauratic limitations] factors that influenced the level of control they felt to administer the FAB program effectively: First: bureaucratic limitations. Managers discussed how rules, regulations, and ordinances could be obstacles to effectively administering and marketing the FAB program. Some managers suggested these obstacles may exert cons…	Bureaucratic Constraints: Rigid rules limited creative program implementation (e.g., restrictions on using local produce in cooking demos) and grower association bylaws required lengthy consensus-building for operational changes Vendor Supply (programme//pre-existing) Challenges: Strict local-producer requirements created vendor shortages where difficulty retaining vendors due to financial instab…		Physical opportunity	Environmental context and resources	Environmental restructuring, Enablement	Guidelines, Environmental/social planning, Fiscal measures, Service provision	“we just find that with government agencies that they’re . . . at least around here, they’re very timid to go beyond anything that they see as their specific rules and regulations.” "The manager addressed the constitution, saying: It doesn’t lend itself to like the modern democratic process. You know? Yes, you can have a constitution or whatever, you can have bylaws, but you have to be able to sa…
38	Parks 2020		[ Technological and existing systems challenges] Several challenges were also identified when working with various retail food outlets, including implementation, tracking, and distribution and sourcing of local FVs. One barrier commonly cited was working with existing technology and POS systems. Also, Distribution methods included loyalty cards, coupons, or automatic discounts. If a retail outlet…	Technological & System Limitations: POS Compatibility Issues with incentive intervention as older retail point-of-sale (POS) systems struggled to integrate incentive methods (loyalty cards, coupons, automatic discounts), requiring grantees to develop workarounds. Tracking & Distribution Barriers: Sourcing and distributing local fruits/vegetables (FVs) was complicated by outdated retail tech syste…	significant	Physical opportunity	Environmental context and resources	Training, Environmental restructuring, Enablement	Guidelines, Environmental/social planning, Service provision	"They’ve changed to a different POS system, which has less flexibility. The system could not recognize an EBT customer in real time and a program had to be written to capture transactions”
38	Parks 2020		[ Stigma against beneficeries] Interviewees reported some nuanced challenges with reaching low-income populations across their geographic regions. At all location types, potential stigma against SNAP benefits and incentives being used created a hurdle that was best addressed through education and continued implementation for stakeholders to recognize multiple benefits for the community.	Percieved stigma against SNAP benefits that it is not for everybody, for certain demographics and incentives being used created a hurdle to work against these narritives ecognize multiple benefits for the community.		Social opportunity	Social influences	Environmental restructring, Enablement, Modelling	Environmental/social planning, Communication/marketing	One interviewee described the need to overcome stigma, “There’s perceptions about farmers markets not being for everybody. That they’re for certain demographics’ income levels. So working against some of those narratives.”
39	Evans 2024		[Inadeuate service providers/resources relative to service needs and nature] Given that fruit and vegetables are perishable and do not last an entire month, these data suggested that the potential effect of Food on the Move was being limited by serving 34 sites with 1 mobile market [ IF incentive structure Gift cards] Initially, Food on the Move issued the incentive to SNAP customers in the form …	Inadequate Service Coverage: Limited Reach as a single mobile market serving 34 sites could not meet demand, especially since fresh produce is perishable and requires frequent distribution.The program’s potential benefits were constrained by insufficient access points. Inefficient Incentive Structure (Gift Cards) with low Redemption Rates: 13% of gift cards (worth $28,664 in 2016) went unused, me…		Physical opportunity	Environmental context and resources	Environmental restructuring, Enablement	Environmental/social planning, Fiscal measures, Service provision
40	Silva 2023		[ Burdensome administrative processes of the incentive] Administrative burdens especially for the SFMNP vouchers and tokens. Several vendors mentioned challenges with the administrative side of the program because of the burdensome management of tokens and coupons, [Limited funding] Two themes emerged from respondents’ suggestions for improving the program: (2) increasing funding for shoppers and…	Administrative Burdens: Vendors reported cumbersome management of paper vouchers and tokens, creating operational inefficiencies. Funding Limitations: vendors emphasized the need for Increased support, higher funding to boost participant benefits and geater investment in advertising and promotion to improve program awareness and participation.		Physical opportunity	Environmental context and resources	Environmental restructuring, Enablement	Environmental/social planning, Fiscal measures, Service provision	“Tracking the [SNAP] tokens and cards can be clunky,” “Senior coupons—keeping up and turning them in every two weeks . . . [was] more admin work.”
41	Franckle 2023		[Communication channels failure and incomplete data collection]: several communication challenges with participants were documented. Communicating with participants (e.g., large group emails were rejected by servers, and the need for cell phone carrier information). Another challenge was that participants’ mailing addresses were not collected at enrollment, so if the study loyalty card needed to …	Communication and Data Collection Issues: Failed bulk email communications due to server rejections, missing participant contact information (mailing addresses, carrier details) complicated follow-ups, lost loyalty cards couldn't be properly replaced due to incomplete enrollment data Coupon Redemption Problems: Non-standard coupon printing process caused confusion and frequent technical failures …		Physical opportunity	Environmental context and resources	Training, Environmental restrucuring, Enablement	Guidelines, Environmental/social planning, Service provision
42	Moore 2024		[Disruption of implementation process due to difficulities in registeration processes] These registration difficulties caused disruption at the start of implementation, which then reduced the weeks that the scheme ran in schools."The registeration processes was problematic not in terms of the time required and the impact on classes [ School based restrictiones and Limited time/ options to engage …	Heavy Workload & Tight Deadlines: Staff had one year to configure the system, train personnel, and launch—while also monitoring food purchases and adjusting the interface. Registration & Implementation Disruptions: Problematic Enrollment where difficulties in registering students delayed the program launch, reducing operational weeks. Also, Registration processes were cumbersome and interfered wi…		Physical opportunity	Environmental context and resources	Environmental restrucuring, Enablement	Environmental/social planning, Service provision	"‘In school we are always told to get off the internet and do what we’re doing or do what we are meant to be doing’ (M) ‘And so the Eat4Treats has been sitting with me, maybe for 10 days and a few of them approached me’ (Principal 1).
43	Reese 2024		[Interpersonal dynamics challenges to recrtuitment] The coaches also contended with the frequent need to tactfully engage with parents or guardians. In some cases, the parent or guardian was more motivated to schedule the SPS than the study participant. The coaches reported that engaging with parents or guardians could in some cases facilitate scheduling SPS sessions, but in other cases could ali…	Interpesonal dynamics challenes to tactifully engage key groups e.g. parents in recruitments levargaring their influence without alienating the adolescent		Social opportunity	Social influences	Enablement	Guidelines, Environmental/social planning
43	Reese 2024		[Nonresponse and engagement challenges due logitstica/contextual barriers of adolescents] Coaches and participants had the option of meeting in person, but the evaluations and subsequent meetings were almost always carried out by phone or video connection, a very useful option once the COVID-19 pandemic started [29]. One challenge was some participants’ nonresponse to requests for the initial SPS…	Engagement & Accessibility Barriers: Low Responsiveness: Some participants did not reply to initial meeting requests, requiring repeated follow-ups by coaches. Adolescent/school-Specific Challenges: School Restrictionsas many teens had no device access during school hours. and scheduling Conflicts where afer-school activities (sports, labs, etc.) limited availability. Technological & Workload Iss…		Physical opportunity	Environmental context and resources	Environmental restrucuring, Enablement	Environmental/social planning, Service provision
44	Zulman 2013		[State and federal policies] affecting program structure and the possibility of Discrimination or access to discounts based on medical condition. BCN leaders noted that great efforts were made to ensure that the new program met legislated requirements. In addition, several federal policies constrained the nature and size of incentives that could be offered. Also, HIPAA’s nondiscrimination provisi…	Regulatory Constraints on Program Design: HIPAA & ADA prohibited discrimination based on health status/disability, requiring incentives to focus on behavioral participation (e.g., physical activity) rather than health outcomes (e.g., BMI changes). Other states required proof of "health behavior improvement" for wellness programs, shaping incentive structures. Privacy & Data-Sharing Complexities: …		Physical opportunity	Environmental context and resources	Environmental restrucuring, Enablement	Guidelines, Legislation, Environmental/social planning, Service provision	“We wanted to make sure … that we were interpreting wellness incentives appropriately and as the legislation dictates.” “We always are very mindful of Department of Labor Health Insurance Portability and Accountability Act (HIPAA) guidelines as they are associatedwith wellness incentive plans,” “The federal law is very clear: there can be a 20 % spread of the total healthcare cost.” “A physician …
45	Gilson 2017		[ Intervention incongurrent with context] Perceived lack of time, fatigue and poor physical infrastructure were commonly cited problems. Discouraging work environment and culture Reduction of 'on the job' physical activity due to the nature of the role. Manual tasks not as common as they were years prior. Depot manager comments provided different insights into healthy choice barriers, highlightin…	Contextual Misalignment with Modern Work Realities: Workers cited lack of time, exhaustion, and poor workplace infrastructure as barriers to healthy behaviors. Also the work Culture Pressures as Drivers often take multiple shifts to meet financial needs, leaving little energy for health efforts. Dietary Tracking Burdens: Time-Consuming Logging as drivers found diet monitoring harder than physical…		Physical opportunity	Environmental context and resources	Environmental restrucuring, Enablement	Environmental/social planning, Service provision	“I know all the things I need to do (to be healthy) but I’m also in a difficult position because of this particular job. I do a lot of interstate, often nine days straight. Literally, catching an hour sleep here or there. You are in so much of a hurry to meet deadlines.” “You work long hours and you need to make the money. I do think that sleep is a problem and also access to good food. Where do …
46	Corder 2021		[limited institutional support and logistical barriers] Primary factors that may have contributed to the lack of implementation include uncertainty of the roles subgroups played within the GoActive intervention,a lack of institutional support for contact teachers and school-level constraints (e.g. PA uniform took time to change, , limited facility space and equipment to run PA activities, resourc…	Institutional and Logistical Challenges: Ambiguity around subgroup responsibilities within the intervention amidst Insufficient institutional backing for contact teachers. School-Level resource vonstraints included time-consuming uniform changes for physical activity (PA), limited facility space, equipment, and resources and teacher absences and poor timing (e.g., exams, end-of-year priorities). …		Physical opportunity	Environmental context and resources	Training, Environmental restrucuring, Enablement	Guidelines Environmental/social planning, Service provision	This was reinforced by the contact teacher at school G: "I’ve found that that has been the biggest pressure of it, that I may . . . Because I am the head of year by myself, I haven’t got an assistant, I haven’t got anyone else helping me and I’ve found that this has been, not something that, but I just haven’t been able to impart as much of my time on this as maybe I want to but I’m just unable t…
46	Corder 2021		[Interpersonal barriers due to peer hierarchy and group norms] Year 9 student behaviour, attitudes and engagement were discussed as a challenge to implementation by mentors and Year 9 students themselves. The age gap between the year groups, mostly for those mentors who were in Year 10, was constantly cited by mentors as an issue for managing attitudes and behaviour within the Year 9 cohort. Ment…	Interpesonal dynamics challenegs due to peer hierarchy and group norms to be able to lead the intevervention in school setting		Social opportunity	Social influences	Environmental restructring, Enablement	Guidelines, Regulation, Environmental/social planning, Service provision	They wouldn’t listen to us because we’re just students as well. So you’d tell them what to do and then they’d do it for like 5 minutes and then it’d just turn into like a free-for-all. Mentor focus group, school E " Once we kind of got them involved, we kind of had like a few, like maybe three or four boys that weren’t involved and they were kind of like swaying the whole class." Mentor focus gro…
47	Jose 2022		[Covid-19 During programme implementation led to early termination] Project was terminated early as a state of emergencey was declated where From March 25, 2020, cashless bus fares were introduced, and a bus fare amnesty was in place from 27 March 27, 2020, to the May 31, 2020. Study investigators stopped trips4health on May 14, 2020, because of the broadscale social changes imposed by COVID-19, …	COVID-19 Disruption & Early Termination: Program Halted: Ended prematurely due to public transport safety concerns during pandemic,introduction of cashless fares and fare amnesty which also lead to inequitable intervention phase timing (some participants incentivized pre-COVID vs. during COVID). Technical Failures: App & Data Errors: Travel App Malfunctions e.g. Failed to record tripsor recorded …		Physical opportunity	Environmental context and resources	Environmental restrucuring, Enablement	Environmental/social planning, Service provision	"found the biggest and really the only factor as to whether or not I catch the bus to work is the actual requirements of my work. Sometimes I am required to have my car at work and use it for work and sometimes I am not " " I have struggled to increase my bus trips in recent weeks. My lifestyle is not conducive to manage the trips on a regular basis." Service There are no buses in X so I cannot t…
48	Hagedorn 2014		[Cost, time and staff burden as barriers to intervention adoption ] When asked about barriers to adopting the intervention as part of standard clinical treatment, the most common theme( n=6), was cost. An additional barrier mentioned by three respondents was allocating staff time to administer the intervention. All 3 leaders of the participating clinics indicated that they were interested in impl…	Cost and Resource Constraints: Primary Barrier was the High costs (cited by 6 respondents) for incentives and rapid urine testing. Also, Staffing Challenges as clinics reported being already overcapacity, with no bandwidth to administer incentives without Hiring additional staff, Reallocating time from other priorities. Group-based programs faced extra hurdles in adapting the intervention. Increa…		Physical opportunity	Environmental context and resources	Environmental restrucuring, Enablement	Environmental/social planning, Fiscal measures, Service provision	“The time commitment would be a barrier. You need staff that would be in charge of this. The expense would also be a barrier. I see the lab costs as being the most expensive cost. Sending confirmations to the lab is very expensive but I think it’s really important that we do that.” “The biggest barrier is that I would have to pull staff from other tasks in order to do it. There are only so many s…
51	Brolin 2017		[Implementation challenegs due to complex population needs] 1) The complexity of how and where to communicate the intervention. RSNs who participated in the Learning Collaborative, however, felt that recruiting for RSN services was best done in the detoxification facility because of the access to clients. As once clients leave detoxification and re-enter the community, it is much more difficult t…	Complex Population Needs & Communication Barriers: Poor Timing for Intervention Explanation as clients in detox were often too ill/medicated to fully understand the incentive program so Explaining incentives during detox was difficult, but waiting until the first post-detox visit risked losing engagement. Missed Enrollment Opportunities as key staff were not always available in detox units, missi…		Physical opportunity	Environmental context and resources	Environmental restrucuring, Enablement	Environmental/social planning, Service provision
52	Becker 2019		and actual recruitment challnges] related to patient flow or p and lack of "appropriate patients" Of note, the most common patient-level barrier was lack of “appropriate clients”: this could reflect actual recruitment challenges, insufficient patient demand, or provider misperceptions about CM’s applicability. [Staff resources] encompassed issues related to staff time, attitudes, or qualification…	Recruitment Challenges: lack of "Appropriate Patients" due to: Low patient demand for incentive-based treatment, Provider misperceptions about which patients qualify and Actual patient flow issues (e.g., not enough eligible candidates). Staffing & Resource Constraints: Staff shortages due to vacations, leave, or turnover Organizational-Level Obstacles: Insufficient Funding/dedicated budget for in…		Physical opportunity	Environmental context and resources	Environmental restrucuring, Enablement	Environmental/social planning, Fiscal measures, Service provision
53	Desrosiers 2019		[ Delayed FI incongurrent with complex population needs] it was shared that the reality as a drug addict wasn’t consistent with the way the tokens were distributed. The participant opined that her substance use problem accustomed her to get things in a short period of time, which didn’t make it easy for her to wait 6 weeks for the drawing session. [ Limited time for optimal implementation and lim…	Incentive Timing Mismatch with Patient Needs: Delayed Rewards Clashed with Addiction Patterns as participants struggling with substance use disorders were accustomed to immediate gratification, making it difficult to wait 6 weeks for incentive drawings. The delayed reward system failed to align with the urgency of addiction-driven behavior. Insufficient Implementation Time & Engagement Barriers: …	Minor	Physical opportunity	Environmental context and resources	Environmental restrucuring, Enablement	Environmental/social planningService provision	I would have liked to dip draw right after having 4 tokens, it makes more sense in my head to get something right now instead of waiting six weeks…probably I think like that because I’m a drug addict.
54	Becker 2021		[ Challenges due to unexpected event: COVID-19: Fear of contagion given the nature of incentive delivery ] One of the most common barriers was fear of contagion, both in terms of the risk of getting patients sick or of catching the virus them- selves. This barrier was articulated by 5 OTP respondents (one leader, four counselors). Fear of contagion was predominantly driven by the logistics of CM …	Fear of Viral Contagion in Incentive Delivery during CM prize distributions due to high-risk components of the intervention i.e Physical Fishbowl Draws, and prize Cabinets/Menus which clashed with pandemic safety needs.	significant	Physical opportunity	Environmental context and resources	Environmental restrucuring	Environmental/social planning	One counselor noted that they could not figure out “the issue with how do we try to do this without everybody touching papers in a bowl with COVID. ”
54	Becker 2021		[Difficulty engaging patients in remote CM draws and logistical difficulities of prize distribution] Challenges with engagement faced due to the transition to telephonic/video conference sessions during covid. Other logistical challenges were noted with trying to describe the prizes and distribute the physical prizes during social distancing.	Patient Engagement Difficulties Due to COVI-19 changes: Transition to phone/video-based CM sessions reduced participation and interaction quality as lack of in-person connection made it harder to motivate and retain patients in the program. Prize Distribution Logistical Issues: Describing Prizes Remotely as counselors struggled to effectively communicate prize options without physical menus/displ…		Physical opportunity	Environmental context and resources	Training, Environmental restrucuring, Enablement	Guidelines, Environmental/social planning, Service provision	“doing it on the phone is horrible. Clients sometimes do not pick up, or to contact them is more difficult because they do not have to come every day to here. ” “over the phone it’s very dif- ficult to say who is engaged and who is not.
54	Becker 2021		[structural and regulation changes and redefining realistic target behaviours due to unexpected events] Challenges re-defining the CM attendance target due to changing regulations. Difficulties related to having to change weekly attendance target as a result of changes to services offered. 4 OTP representatives (two leaders, two counselors), was the need to re-define the weekly CM attendance targ…	Structural & Regulatory Changes Disrupted CM Targets: Shifting Attendance Requirements where group counseling cancellations (to limit virus exposure) invalidated existing CM attendance targets. Also, take-home medication doses reduced daily clinic visits, making prior targets unrealistic and staff struggled to redefine measurable behaviors for incentives. Staffing Shortages & Overload, absences a…		Physical opportunity	Environmental context and resources	Training, Environmental restrucuring, Enablement	Guidelines, Environmental/social planning,Fiscal measures, Service provision	“we’re not running group. ” “our goal for CM was that they had to attend group…[but] we had ceased it [groups] when COVID became an issue. ” "obviously, we cannot do seven outta nine [clinical contacts - the prior attendance target]…because a lotta people ended up with take-homes. ”“for a good three, four months ”during the pandemic because “we had about 12 staffmembers catch the virus. ” "there’…
55	Metrebian 2021		[low uptake] Recruitment of the target population was not feasible; fewer individuals than expected presented for a new episode of opioid agonist treatment (OAT), were prescribed methadone, or attended one of the three participating pharmacies. staff acknowledged the low numbers of new opiate users presenting to services .Staff suggested changes to eligibility criteria in a future confirmatory tr…	Staffing Shortages Hindered Implementation as: lack of Personnel for Screening/Consent due to clinics struggling to assign staff for recruitment. Low Participant Recruitment & Uptake: Fewer Eligible Patients Than Expected due to restrictive eligbility criteria ie. low numbers of new opioid users entering treatment. and limited patients on methadone or visiting participating pharmacies. Mobile Sys…		Physical opportunity	Environmental context and resources	Environmental restrucuring, Enablement	Environmental/social planning, Service provision
56	Winograd 2022		Agencies - grants and Missed opportunities to reach Populations in need ] None of the 12 treatment agencies that applied for CM funding served Black men in St. Louis (the only St. Louis-based agency awarded a CM pilot grant is a women-only program). First, racial inequities in overdose deaths in Missouri have grown considerably in recent years. Though these disparities are driven by deaths among …	Racial Equity Gap in Service Access: None of the 12 funded treatment agencies served Black men in St. Louis despite experiencing disproportionately high overdose deaths Potential systemic barriers included: agencies prioritizing basic survival needs over pilot programs, lack of culturally adapted CM models, historical disinvestment in Black communities Staffing and Implementation Hurdles: Program…	significant	Physical opportunity	Environmental context and resources	Environmental restrucuring, Enablement	Regulation, Legislation, Environmental/social planning, Service provision
57	Green 2023		[Admin capacity: cost, time, staff and limited resources] During intervention adoption, concerns among provided related to administrative processes particularly related to cost and staff time time concerns and organizational capacity to implement the program and carry out onboarding processes in light of staff trunover which limits knoweledge accumulation. During Inital implementation, Interventi…	Administrative & Resource Barriers: Staffing & Training Burden as time-intensive training clashed with clinicians’ limited availability. High turnover hindered knowledge retention and program continuity which led some sites to fail ull implementation due to recruitment and staffing issues. incentive Distribution Complexity as escalating reward schedule (higher incentives for consecutive clean UDS…		Physical opportunity	Environmental context and resources	Environmental restrucuring, Enablement	Regulation, Legislation, Environmental/social planning, Service provision	"Our biggest concern was the ability to staff the program. We’ve been pretty short-staffed in a lot of areas. It’s been difficult to find clinical staff and retention has been an issue. Our numbers in the programs haven’t really diminished. So, for me, that was a concern" "I am booked eight to five, Monday through Friday, and I’m scheduled outabout a month at a time. So, any kind of schedule chan…
57	Green 2023		[Orgnisational cultures clash/power dynamics] The most common transition was among sites who received referrals from drug treatment courts ( 3 organisations) ; which shifted away from planned treatment cohorts due to reluctance from the drug court when informed about the non-abstinence-based theoretical underpinnings of the program.	Reluctance from the drug court ( referral sites) when informed about the non-abstinence-based theoretical underpinnings of the program as it formed a transition from their organisational norms. .		Social opportunity	Social influences	Restriction	Guidelines, Regulation
58	Curran 2023		[Limited resources, cost/benefit and competing priorities] Almost all interviewees reported the limited costs and competing priorities . How CM fits with the work of mental health practitioners, resource limitations. Scarcity of NHS resources was raised as a barrier to implementing CM in EIS in every interview and focus group with managers and staff. Three main resource barriers emerged: limited …	Resource Scarcity & Competing Priorities: High caseloads ( time constraints) left little capacity for CM adoption. Direct Costs of the intervention raised concerns over voucher expenses and budget allocation. CM clashed with clinical guidelines and commissioning strategies ( insititutional priorities)	significant	Physical opportunity	Environmental context and resources	Environmental restrucuring, Enablement	Guidelines, Regulation, Environmental/social planning, Fiscal measures, Service provision	“If it’s done properly, it would take. . .quite a bit of time and finding that time would,. . .be quite difficult within the current constraints.” “I obviously understand that in the long term this is saving a lot of money, if it works. . . having the money right there and handing it over. . . feels more real than just giving them an hour of someone’s time. . . it feels more like you’re just thro…
59	Cohen 2023		[The Physical aspect of behaviour test validation and population needs] had some difficulty; For some patients and those with lung disease, the physical aspect of testing, either providing a breath sample for the breathalyzer or having a finger stick for PEth, led to some frustration. [Unexpected external event and understocking] VA patient participants in this study were given VCS coupons to red…	Patient-Level Barriers: Physical Testing Difficulties as the Breathalyzer/finger-stick tests frustrated some, especially those with lung disease. Incentive Stock Issues as the VA Canteen often ran out of preferred items (e.g., female-targeted products) that was excarabeated by COVID-19 which worsened supply shortages. CM Design Complexity; Some found the reward structure confusing, preferring sim…		Physical opportunity	Environmental context and resources	Environmental restrucuring, Enablement	Environmental/social planning, Fiscal measures, Service provision	“… the only thing I had a problem with was the breathalyzer. I couldn’t hardly blow it—I couldn’t blow those breathalyzers.” “Our Canteen is scantily stocked and I was just thinking that if we had had a woman in… I think that she would be extremely disappointed…I find, some of the things that I think do not speak to women or do not let women know that the VA appreciates them." “I would say if the…
60	Parent 2023		[Legalisation, funding constraints and medicaid reimbursement caps] At the time of the writing of this paper, the Substance Abuse and Mental Health Services Agency (SAMHSA) capped the use of State and Tribal Opioid Response funding for CM reinforcers at $75 per person per year (Knopf, 2021). A key principle in the mechanism of positive reinforcement to induce behavior change is that the reinforce…	Legal & Funding Constraints: Inadequate Incentive Caps as CM reinforcers limitaions to $75/person/year—too low for meaningful behavior change. Medicaid reimbursement caps on urine drug screens (UDS) make frequent testing costly. Logistical & Structural Barriers included: Incompatible Treatment Settings e.g. Jails, ERs, and inpatient facilities (50% of trained sites) could not implement CM due to …		Physical opportunity	Environmental context and resources	Environmental restrucuring	Guidelines, Legislation, Environmental/social planning, Fiscal measures
60	Parent 2023		[Clash of treatment philosphies and organizantional culture impact on implementation] CM protocol incongurrent with treatment approach:, ccontradicting existing philosophy affected buy-in ;Court-ordered treatment requirements can violate CM fidelity- Concerns about CM contradicting existing philosophy affected sites’ buy in and that stigma toward patients as a CM implementation barrier resulting …	Power dnamiccs pertaining between different providers/parties involved to diverse treatment philiosphies /prgansiational culutres impacting buy- in, adoption and resulting in inconsisistencies.		Social opportunity	Social influences	Restriction, Environmental restructuring, Enablement	Guidelines, Regulation, Environmental/social planning, Service provision
61	Hallgren 2023		[ Physical Cumbersome testing requirements and early disengagement] Additionally, difficulities in testing resulted in low cmpletion rate to verify quit status. (QUAL) Substance tests were difficult to perform , it was required to have the larger and cumbersome test kits and supplies at hand all times to respond to the random testing alert which also was required to be done by inconcivent testing…	Testing Logistics Burden: Cumbersome physical test kits created participation barriers, Random testing alerts with inconvenient time windows reduced compliance which led to low verification rates due to testing difficulties Intervention Complexity Issues: Inflexible program structure failed to accommodate varied schedules, different learning styles/comprehension levels and overly lengthy onboardi…		Physical opportunity	Environmental context and resources	Environmental restrucuring, Enablement	Environmental/social planning, Service provision	Because you could even still go into, ’do you have a phone? Do you need access to a phone? Do you have space for yourself in your own environment where you can focus on doing a couple things for your recovery, even if it's the app or your own mindfulness meditation on your phone?’ All of that wrap together where you can talk about creating space for that. What does the space look like? Daily remi…
62	DePhilippis 2023		[Funding limitations/poor management of funds] Most of the VA facilities that had been allocated funds to implement CM went through the funds relatively quickly, and no further funds were initially available from the VA. This put the program in jeopardy, as very few facilities had discretionary funds that were available to sustain the program. [Burdensome Frequent procedures, organisational proce…	Funding & Sustainability Issues: Rapid Depletion of Seed Funds as Most VA facilities exhausted initial CM budgets quickly, with no immediate/consistent replacement funds so few clinics could suautain the porgramme independently. Operational & Staffing Burdens: Frequent Testing Requirements for smoking cessation were feasible in residential settings but burdensome for outpatient clinics.Also, Impl…		Physical opportunity	Environmental context and resources	Environmental restrucuring, Enablement	Regulation, Environmental/social planning, Fiscal measures, Service provision
63	Gorman 2024		[Unexpected extrernal events] When deciding to implement this protocol, a major decision-point for the program was the need for efficiency. The clinic often stacked injection appointments to specific days and times of the week, and a decrease in nursing staff availability created an increase in wait times, so HTCM was implemented to decrease frequency and duration of in-person contact during the …	Staffing & Efficiency Pressures: pre-existing nursing shortages led to long wait times for injection, appointments, COVID-19 restrictions exacerbated delays, risking patient trust and service quality.		Physical opportunity	Environmental context and resources	Environmental restrucuring, Enablement	Environmental/social planning, Service provision
64	Jakubowski 2024		[System Level and organizational policesPolicies] Five of the six OTPs rated both system-level leadership and system-level policies as barriers or neutral; there was universal uncertainty about the extent of federal support and state and federal policies and regulations around CM. Moreover, there seemed to be broad uncertainty about whether the state-level leadership support would be sustained. A…	System & Policy Barriers: opioid treatment programs (OTPs) reported uncertainty about federal/state CM policies, policy gaps particularly lacking digital CM platform policies and questioned sustainability of leadership support Funding & Sustainability Challenges: limited Funding availability where OTPS 4/5 couldn't implement without external funds, and only 1 program prioritized CM enough to self…	significant	Physical opportunity	Environmental context and resources	Environmental restrucuring, Enablement	Guidelines, Legislation, Environmental/social planning, Fiscal measures, Service provision	("If they exist, I don’t know what they are." Site 102).
64	Jakubowski 2024		[System Level Leadership and lack of community support] Five of the six OTPs rated both system-level leadership and system-level policies as barriers or neutral; there was universal uncertainty about the extent of federal support and state and federal policies and regulations around CM. Moreover, there seemed to be broad uncertainty about whether the state-level leadership support would be sustai…	lack of collaboration or mutual influence between OTPs and community organizations. Community support and buy-in are lacking; concerns about opposition from courts and partner organizations.	significant	Social opportunity	Social influences	Environmental restructring, Enablement	Guidelines, Regulation, Environmental/social planning, Service provision	OTPs reported that community organizations do not have “any say over our practices” or “don’t really support our treatment ideas anyway” (Sites 101 and 104).
65	Smoker 2025		[ Structural/contextal referral gaps and recruitment challngesl] In contrast, lack of opportunity (patient referrals) was more frequently experienced than anticipated. In fact, this barrier was not anticipated by any study participants, though it was noted in the SUD field in general (Blevins et al., 2018) as well as in other Indiana EBP training programs. [Unexpected Organizational readiness and…	Referral & Recruitment Gaps: Unexpected lack of patient referrals emerged as a major barrier as programs struggled with low enrollment pipelines. Organizational Instability: Staff turnover forced one site to withdraw mid-program. Leadership buy-in varied, with some sites showing weak commitment to CM adoption. Incentive Distribution Barriers: Gift card vendors triggered patient privacy concerns (…		Physical opportunity	Environmental context and resources	Tranining, Environmental restrucuring, Enablement	Guidelines, Legislation Regulation, Environmental/social planning, Fiscal measures, Service provision
65	Smoker 2025		[Values- implemntation/evidence misalignment: Non-adoption of abstinence-based CM (due to cultural/logistical/value conflicts) despite evidecne] It is notable that not a single site elected to reinforce drug abstinence despite strong empirical evidence of its efficacy and encouragement during the CM training and TA calls. A multitude of reasons existed as to why sites selected a different target …	vlaues-implementation/evidence misalignment leading to non-adoption due to cultural conflicts despite evdence.		Social opportunity	Social influences	Restriction, Environmental restructuring, Enablement, Modelling	Guidelines, Regulation, Environmental/social planning, Communication/marketing
66	Research Triangle Institute and National Academy for State Health Policy 2017		[Time -extensive Planning and unanticipated delays] it would be and required flexibility and more planning than anticipated. States found that starting up their programs took longer than anticipated. Reasons for implementation delays included the need to hire and train staff, obtain Institutional Review Board (IRB) approval, and formalize partnerships and contracts. This resulted in delays for si…	Delays in Program Launch: Extended Planning Timelines longer than projected to implement due to: Hiring/training staff. Obtaining IRB approvals (some needed multiple institutional reviews), Finalizing contracts with vendors/partners (MCOs, CHCs, YMCAs) and multi-site approvals (e.g., Minnesota, Hawaii) slowed progress. Recruitment Shortfalls not meeting state targets with states reducing targets …		Physical opportunity	Environmental context and resources	Tranining, Environmental restrucuring, Enablement	Guidelines, Environmental/social planning, Fiscal measures, Service provision
66	Research Triangle Institute and National Academy for State Health Policy 2017		[Inter-organisational friction and gatekeeping] Wisconsin used a third-party vendor for its quitline, but found the experience difficult because it removed control from the State. For example, once an incentive card was ordered, the participant had to work with the third-party vendor should any issues arise, rather than working directly with staff involved in the study.which did not reflect well …	Interorganisational friction and gategaping of incentive flow pathway (third party vendor/departments) and states losing control over implemnetation e.g. montirotin, tracking. Providers uncomfortable ditrubuiting the incentives leading to the incentive being meted it out in small amounts. The health centers were very concerned about audits and the security of gift cards within the health centers,…		Social opportunity	Social influences	Restriction, Environmental restructuring, Enablement	Guidleines, Regulation, Environmental/social planning, Service provision
67	Perry 2019		[ building trust] Some participants in these programs were reassigned to new staff, which confused participants when new staff contacted them; establishing trust with new staff members was also challenging.	Staff changes disrupted established relationships and trust, affecting engagement.		Social opportunity	Social influences	Environmental restructuring	Environmental/social planning
67	Perry 2019		[Frustrations built up in the client-provider relationship] Across most programs,participants who did not have a positive experience with program staff described being frustrated by their interactions with these staff and less motivated to change their behavior. In some cases, they discontinued their participation in the program	Negative interactions with staff influenced participants’ engagement and motivation.		Social opportunity	Social influences	Environmental restructring, Enablement	Guidelines, Environmental/social planning , Service provision
67	Perry 2019		[Logistic and eligibility barriers for programme enrollemnet] ; some MIPCD programs included barriers that delayed participants in joining the programs when they wanted i.e. paperwork and eligibility. Enrollment paperwork for some programs required considerable time and effort to complete; yet, these participants also shared that the effort was worth it because of the positive impact the program …	Enrollment & Eligibility Challenges: Cumbersome Paperwork led to a lengthy enrollment processes delayed participation. Strict Eligibility as Some were excluded (e.g., obese but not prediabetic for diabetes prevention programs). Intervention Design Shortcomings: Insufficient Support Frequency as monthly post-core meetings were too infrequent to sustain behavior change. Smoking cessation programs e…		Physical opportunity	Environmental context and resources	Environmental restrucuring, Enablement	Guidelines, Environmental/social planning, Service provision	“Yes, I just did not show [to pick up my incentive] . . . because I didn’t have transportation.” (Diabetes management)

## Sheet: CH Barriers- Motivation
Study ID	Author, year	Topic Area	Barrier	Barrier (summary)	Severity	COM-B	TDF	Intervention functions	Policy Categories	Quote
1	Lutge 2014		[Percieved unfairness and perversity of FI strucute ] patients, nurses, and shop personnel were concerned that only certain patients (those with pulmonary TB) were eligible to receive the voucher. They felt that this was unfair, given the depth of deprivation experienced by some patients. Managers of Tb Programme percieved it as problem dute to fear of acting as perverse incentive.	Provider's perceived unfairness, inequity, due to eligibility criteria and potential unintended consequences e.g perverse incentive influenced programme acceptability.		Reflective motivation	Beliefs about consequences	Education, Persusion, Modelling	Communication/marketing, Guidelines, Service provision	I do hear them saying that the voucher is given tothose with PTB [pulmonary TB] only … They arecomplaining - you know people they also want to get the voucher, they are not happy that some people arereceiving it while others don’t’ ‘If you could also try and help the others not just the TB patients. We also have people sick besides (those)diagnosed with TB’ ‘If you target for example the TB patie…
1	Lutge 2014		[Non adherence to protocol: Rationning of incentive distribution/receipt against protocol eligibility criteria driven by perceptions of equity and social justice] Nurses’ tendency to ‘ration’ the vouchers, only giving them to the most needy. Many patients and nurses believed that vouchers should not be given to patients who were relatively better off financially. As a consequence of such, nurses …	Rationing of incentive distribution by providers only giving them to select population based on subjective judgements against protocol impacting fidelity due to professional perceptions of equity/justice. Patients themselves fair.		Reflective motivation	Role and Identity	Education, Persuasion, Modelling	Communication/marketing, Guidelines, Regulation	‘I would decide by looking at who is needy, considering their social problems, then I will give … like if they do tell me they can’t take pills on an empty stomach then I will give considering their background…but those who are working I wouldn’t give …’ ‘Sometimes I do not ask for it, if I see that I do have something’
2	Wingfield 2015		[ Hidden Bank Charges and delays Eroding Trust and stigmatizing patients ] Account maintenance charges were introduced by the bank during implementation of the intervention ( which is supposed to be free of charge) and delays in cash transfers eroded participants’ trust in the project. IInitially, first utilised bank had limited geographical accessibility, inconsisents "in branch" information and…	Delays of incentive, hidden fees e.g. fees of opening a bank account , limited accessibility, inconsistinses in information and stagmitising bank staff associated with the intervention eroded participant's trust. Providers philosphical conflict with incentivising behaviours to patients with drug dependiceines and potential unintened consequences e.g. buying drugs.		Reflective motivation	Beliefs about consequences	Education, Persuasion	Communication/marketing, Guidelines, Regulation	“Some patients lost faith in the project due to the hidden bank charges” “[A negative aspect of the CRESIPT project intervention is] giving an economic incentive to a patient with drug-dependency and for that matter any other benefit/incentive such as food baskets (which some of these patients sell to buy drugs)”
2	Wingfield 2015		[Delay in incentives as a barrier to achieveing project goals] During focus group discussions, the delay between incentivized behaviour and cash transfers was noted as a barrier to achieving project conditions due to the lack of a tangible “reward” and accompanying positive reinforcement loop. For example, when a household attended a participatory community meeting, it could be 1 to 2 weeks befor…	Delays between incentivized behaviour and cash transfers to achieving project conditions due to the lack of a tangible “reward” and accompanying positive reinforcement loop.		Automatic motivation	Reinforcement	Environmental restructuring, Coercion	Guidelines, Regulation, Service provision	“Due to the initial cash transfer delays, some patients didn’t get the money when they most needed it” [CRESIPT Project Nurse]. “Patients want immediate and tangible gratification on the same day as they complete their condition” [Ex-TB Patient Civil Society Representative]
3	Patel 2019		[Reluctance to facilitate enrollment- not a priority] Further, due to their busy work schedule and/or lack of motivation, some doctors were not inclined to facilitate the enrolment process for the patient . This led to incomplete or no details being collected from the patient to enable their enrolment into the scheme.	Lack of motivation/other priorites as a barrier to facilitate client's enrollment to the scheme e.g. incompelete/no data collected		Reflective motivation	Goals	Persuasion, Incentivisation, Enablement	Communication/marketing, Regulation, Service provision, Fiscal measures
3	Patel 2019		[Unwillingness to share private information- Stigma and mistrust] Providers felt that patients’ unwillingness to share their details including bank account and aadhaar (unique 12-digit iID) was a major challenge in the private sector. A.. B) Due to the stigma associated with TB, patients also feared breach of confidentiality.	TB- patients related stigma and fear of confidentiality breach led clients of private/high profile background to not share information/enrol.		Reflective motivation	Beliefs about consequences	Persuasion	Communication/marketing, Guidelines, Regulation, Service provision	…in private sector, some patients are financially well, so they do not require cash incentive and because of that, they are not giving details." "…In private sector, the patients are high profile, so they have stigma related to TB and because of that, they are not giving their information to us."
3	Patel 2019		[Unwillingness to share private information- Higher-SES patients disinterested] Providers felt that patients’ unwillingness to share their details including bank account and aadhaar (unique 12-digit iID) was a major challenge in the private sector. A) Patients from higher socioeconomic strata were not interested in availing the benefit.	Patients from higher SES disinterest to avail the benefit .		Reflective motivation	Role and identity	Education, Persuasion	Communication/marketing, Guideiines
3	Patel 2019		[Inadequate amount] One patient felt that this is an inadequate amount.	Percieved inadeuqate incentive amount.	Minor	Automatic motivation	Reinforcement	Environmental restructuring, Incentivisation	Guidelines, Fiscal measures	"…500 rupees [INR] per month is not enough; it should be increased to 800–1000 rupees [INR] per month."
6	Verma 2024		[Financally stable patients donot value the incentive and confidentiality breech concerns] The majority of patients receiving care in the private sector are financially stable, thus they do not see the value in DBT. Additionally, they worry about being scammed as a result of sharing confidential financial information. [Distrust in the initative] One of the interviewees did not believe the fact th…	Affluant patients do not value incentive, paricularly in the face of concerns of sharing confidential information. Clients disbelief/trust in governmental intitatives related to TB, when more "priorities" exist. Mixed perceptions on incentive adequacy versus appreciating governmental efforts		Reflective motivation	Beliefs about consequences	Education, Persuasion, Modelling	Communication/marketing, Guidelines, Regulation, Service provision	“Those coming from rich family do not feel the need of this incentive, hence they do not provide their details.” “Some patients think that these people are taking our account details maybe they can fiddle with the account. Some have a dilemma as to why are we taking their bank details.” “Patient trouble us by saying why have we not received the amount yet, what are we doing with their account det…
7	Mohan 2024		[Lack of mainstreaming and Role isolation] The field workers observed that the health system currently conceived TB-related work as almost an exclusive responsibility of the NTEP staff despite efforts to mainstream the program work with public health work at primary health care level.	Failure to mainstream the incentive programme. Staff are already fulfilling multiple roles, and adding more conflicts with their perceived responsibilities. Providers morally conflicted over elgibility vs people in need of icnentive		Reflective motivation	Role and identity	Education, Persuasion, Modelling	Guidelines, Regulation, Service provision	"See madam, NPY is a separate scheme but there is no separate HR for it. It is done by the same program staff who have to do case finding, investigations, treatment, monitoring adherence and documentation. So, we cannot put pressure on them beyond a level." "But if you see, these are the most deserving people who need this money, but somehow, we are not able to give them the entire money."- Field…
7	Mohan 2024		[Percieived fixed benefit amount fail differential reinforcement] The stakeholders also highlighted that while the current benefit amount was helpful for few beneficiaries, it was barely adequate for several others. Thus, the utility of the benefit also depended on the socio-economic circumstances of the beneficiaries and households.	Barely inadeuate amount and thus utility in relation to sevral others from low socio-economic circumctances.		Automatic motivation	Reinforcement	Environmental restructuring, Incentivisation	Guidelines, Fiscal measures, Environmental/social planning	"I feel that this money may not be the uniform requirement of everyone. Sometimes, there are very poor patients for whom 500 rupees is insufficient. They may need more. You may also have a person coming from a very high-profile setting; for whom this money is not of much use because they can afford nutrition on their own. So, it is a diverse mix."- District-level NTEP staff
7	Mohan 2024		Social exclusion and scheme blind spot to people most in need] Vulnerable populations like people experiencing home lessness or migrants may not have documents that prove their identity proof to initiate bank accounts. Thus, the neediest people, such as the homeless, destitute and the cognitively challenged, were not included in the scheme due to difficulties in opening bank accounts.	The system assumes a level of cognitive and bureaucratic functioning not all clients possess.		Reflective motivation	Beliefs about capabilities	Enablement	Guidelines, Regulation, Environmental/social planning, Service provision	“The people that we are working on are not suitable for the scheme because they don’t have any formal documents proving their identity. The scheme may be useful for many people, but not for the people that we are working with… I don’t think it is of much help. We would like the governments to place more attention to the PwTB who are on the sidelines and who are too marginalized to fulfil the nece…
8	Chadhar 2025		[Amount percieved as inadeuate relative to costs incurred as a TB patient] The majority of patients emphasized that the amount received is insufficient to purchase nutritious food items.	Inadequate incentive amount (of no use) relative to costs incurred as a TB patient/	significant	Automatic motivation	Reinforcement	Environmental restructuring, Incentivisation	Guidelines, Fiscal measures, Environmental/social planning	“What can you get in ₹500? With that amount, you can barely buy 2 trays of 60 eggs.” “Few patients expressed that instead of giving money, they should be provided with food items directly.” “₹500, nothing substantial can be accomplished. The government should at least be given ₹1000 or ₹1500.” “The ₹500 that are coming are of no use, it's better to receive a packet of items instead.”
9	Kim 2012		[Organizational culture misalignment with programme goal] Employees and LHCs described aspects of their organizational culture that may have influenced intervention impact.	Organisational cultuure/ identity misalignment with the intervention goals.		Reflective motivation	Role and identity	Education, Modelling	Communication/marketing, Regulation, Service provision
9	Kim 2012		[Hesitancy about intervention efficacy] Doubts that financial incentives alone could help smokers successfully quit and noted that smokers should be internally motivated with quitting as the primary reward.	Beliefs that smokers should be intrinsically motivated and the FI alone would help achieve change.	Moderate	Reflective motivation	Beliefs about consequences	Education, Persuasion	Communication/marketing
9	Kim 2012		[Limited motivation] lack of motivation; To them, smoking was essential to helping them manage their stress at work.	Stress as an emotional deterrent, and smoking is used as a coping mechanism in work settings.		Automatic motivation	Emotion	Persuasion, Enablement	Communication/marketing, Service provision, Environmental/Social planning
10	Allan 2012		[ Increased feeling of guilt and FI ] Participants reported a number of reasons for disengagement: The enhanced feeling of guilt, made worse with knowledge of the financial gain and subsequent relapse, led to non-attendance at weekly monitoring sessions. .. For some, this relationship manifested itself in a sense of obligation to the service providers, manifest most clearly when they had “failed …	Enhanced feelings of guilt in light of financial gain and subsequent relapse leading to disengagement from monitoring sessions.Felt change into obligation to providers.		Automatic motivation	Emotion	Persuasion, Enablement	Communication/marketing, Guidelines, Service provision, Environmental/Social planning	”: “. . ..I just felt I had let them down as well. Even though it is yourself, you still feel as if you are letting other people down as well which again is a horrible feeling so then you feel guilt again and I think, I’m just gonna have a fag.”
10	Allan 2012		[Concerns of poor use of service and Stigma] There was concern of reprimand for poor use of the service, embarrassment of confessing their failure and the perceived stigma [Effort not proportional to incentive ] The value of the incenitve is not worth the palaver to get it. Differenct views on its "role as a motivaton. FI weren't easily accessibile. Administration was frequently cited as an issue…	Clients concerns of reprimand for poor use of service, stigma, embarssement in case of failure. Clients perception that the value/benefit to sustain motivation of the incentive is not worth the palaver to get it e.g. accessibility, admin issues		Reflective motivation	Beliefs about consequences	Persuasion	Communication/marketing, Guidelines, Regulation, Service provision	“I mean the £12.50 is great but the palaver to get it, is it worth it? But I guess that’s probably because I’m working. People that aren’t working probably have the time to do all that but I mean it could have been done, I just haven’t got around to it yet.” “It was like, if I was having a good week, yes, £12.50 is coming my way but when you are having a bad week and things are up in the air, I c…
10	Allan 2012		[Contractual relationship- Felt change in relationship] Resons for disengagement hinted at a felt change in clients’ relationship with service providers, with the incentive introducing a quasi-contractual relationship. This placed the patient in the role of “providing the service” (smoking cessation) and the health care professional as the “buyer”. For some, this relationship manifested itself in…	Perceived shift in roles "contractual transactional relationship)—from patient to service provider—altering identity and expectations.		Reflective motivation	Role and identity	Education, Modelling	Communication/marketing, Guidelines, Regulation, Service provision	This was cited as a reason preventing some from advancing in programme: “She [the pharmacist] was very patronising. . .. . .for somebody to sit there and patronise you, it was just not helpful. I cannae quote her but it was like, “right, we’re trying to help you, you are just throwing it back in our face.”
11	McKell 2013		[Dual role of research nurse and smoking advisor: non sustainabile- Role overload, and conflict] The role of research nurse was built in to the study from the start. It was initially felt that the role should be combined with that of smoking advisor. RNs had to have training in cessation in pregnancy issues as well in the study requirements. This was relatively easier for the full time worker as …	Dual role of nurses e.g. intervention administrators and smoking advisors causing role overload "fevered activity" and conflicts over current professional practices.		Reflective motivation	Role and identity	Education, Enablement	Guidelines, Regulation, Service provision , Environmental/social planning
11	McKell 2013		[Initial resistence - Making lives harder and low risk ] Respondents reported some resistance to referring to the NSPS in some areas around the time the study started, although this perhaps reflected misperceptions about the developing service as much as the study. Observed reluctance to refer by some midwives was variously ascribed to: concerns about making women’s lives more difficult by encour…	Resistence of providers to refer clients to the scheme due to misperceptions, reluctance over concers of making women's lives more difficult, and knoweledge that pervious pregnancies seemed unaffected.		Reflective motivation	Beliefs about consequences	Education, Persuasion, Modelling	Communication/marketing, Regulation, Service provision
12	Shields 2016		[ Ethical concerns and potentially exploiting economic desperation.] Because the incentive was very important financially to some women termed ‘breadline survivors’, this group sometimes had arguments over results when they returned a positive result and were ineligible for payment. Apparently, there were no false negative results.. Given that smoking is itself a marker for socioeconomic disadvan…	Experts ethical concerns over incentive potenitally exploting economic desperation with other underlying complex circumstances, social exclusionm inducing friction/mistrust based on smoking status validation e.g. test results and eligibility		Reflective motivation	Beliefs about consequences	Education, Persuasion	Communication/marketing, Regulation, Service provision
13	Passey 2018		[ Testing for quit validation] The Smokerlyzer was not always used at the first visit as intended, because there were some concerns that it was a “serious piece of equipment”.	Smokerlyzer as a serious piece of equipment.		Automatic motivation	Emotion	Persuasion, Modelling	Communication/Marketing, Service provision
16	Apata 2020		[lack of confidence to administer the intervetnion] Peer Motivators also expressed their insecurity when groups sometimes got “out of control.”			Reflective motivation	Beliefs about capabilities	Education, Modelling, Enablement	Guidelines, Service provision, Communication/marketing
18	Breunis 2023		[ Online mode of delivery as demotivating and impersonal] impersonal interactions via online platform and...was daunting and demotivating. The participants felt that online support via the platform was impersonal,	Online platform felt impersonal, daunting and demotivating.		Automatic motivation	Emotion	Persuasion, Enablement	Communication/marketing, Service provision Environmental/social planning
18	Breunis 2023		[Challenges to clients referrals and recruitment ] Talking about Smoking cessation communication to patients was challenging, Referral to the study and and midwives fear them leaving their clinic when discussing smoking cessation too often. [ Mixed feelings about incentive impact/effectivness] Both participants and healtchcare providers reported mixed feelings about the impact and motivational ef…	Fear that repeated discussions may lead to patients disengaging from care. Uncertainty about whether incentives lead to meaningful behavior change.		Reflective motivation	Beliefs about consequences	Education, Modelling	Communications/Marketing, Guidelines, Service provision
18	Breunis 2023		[Guilt of winning] … and it feels like briber, and some participants felt guilty for receiving incentives while others did not receive them despite also doing their best to quit smoking,	Feelings of guilt, and discomfort among participants for receiving the incentive while others did not despite doing their best to quit.		Automatic motivation	Emotion	Persuasion, Enablement	Communication/marketing, Guidelines, Regulation, Environmental/social planning
21	Green 2017		[Role conflict due to gift card logistivs vs clinical judgement ] Disturbance of work flow to align with the intervention and built up resentment. Some staff and investigators reported that they, or the providers they worked with, felt obligated to schedule visits or lab work around the requirements for gift card eligibility rather than clinic availability, space, or patient needs, and some resen…	Professional standards conflicted with the scheme structure e.g. clinic vists/lab workarounds which was in conflict with their professional practices. Eligibility criteris for incentives not aligned with the clinical status/ journey of the patients and providers professional/philosphical conflicts on aim and who to target e.g. patients who may already be suppressed hence the incentives becomes a …	significant	Reflective motivation	Role and identity	Education, Persuasion, Modelling	Communication/marketing, Guidelines, Regulation, Service provision	“The study calls for its own needs in terms of CD4 and viral load draws. And meanwhile clinical care has sometimes different demands. . . .meaning that providers might not always see the need to send the CD4 and viral load on a given date. But the patient feels that if they don’t have CD4 and viral load done on those dates, they don’t get their incentives card. So there’s some times it led to con…
22	Shelus 2018		[Negative Patient Reactions to Incentive Offers]Some site investigators and staff indicated that a small number of patients reacted negatively when the intervention was first described to them.	Negative reactions e.g. offence to intervention introduction when patients just got their medical diagnosis.		Automatic motivation	Emotion	Persuasion, Enablement	Communication/marketing, Service provision	"The patient is like in tears, crying, and the worst thing we did is that we started explaining to her [the coupon program]. . .She didn’t want to hear it, she got mad. She started cryingmore.She said that we were offending her. That number one, why were we assuming that she’s not going to come back to her appointment? So we think that she doesn’t care about her health? Is it something about the …
22	Shelus 2018		[Contractural relationship and transctional expectations- change in provider-client relationship due to incentives] : intervention created expectations among patients about being paid to obtain health care, and a sense of entitlement. Several site investigators discussed initial concern that patients might demand gift cards and develop expectations, but did not see this materialize.	The formation of a contractrual transctional relationship between clients-providers where demands of money/expectations are raised for intervention engagement.	Minor	Automatic motivation	Reinforcement	Environmental restructuring, Coercion	Guidelines, Regulation, Environmental/social planning	" I think they—once they received the $125, they expected money to come. . .for any other services. “Oh you want me to stay? You’re gonna have to pay me to stay.” "There were so few incidents of patients really misbehaving during this. . .and I would have thought that would have been a huge problem. That whenever money was involved that people would be demanding things and asking for things and t…
22	Shelus 2018		[ideological oppositions and conflicts] Despite an overall positive opinion of the program, about half of the patients were opposed to the concept of paying people to link to care and thought people should be self-motivated to link to care for their own health and well-being without an incentive. Staff and providers also had their own conflicts and challenges with the programme.	Patients ideologically and conceptually opposed paying people as they should be self-motivated. Similarly for staff.	significant	Reflective motivation	Role and identity	Education, Persuasion, Modelling	Communication/marketing, Guidelines	"I don't feel that someone should be paid for something that they need to do for themselves. . .if you don't want to do it, that's fine. Nobody's going to make you do anything. . .I don't feel like you should get it if that's the only reason why you're here. " Another patient reported having a negative emotional reaction when he was given the coupon. This is going to sound very hard, awful but I …
22	Shelus 2018		[Negative opinioins about percieved un-necessary intervention] Site investigators and some staff who expressed negative opinions felt that their clinics already had strong L2C interventions and that an FI could not have an impact or was not necessary. [ Mixed opinioins on FI amount, public health rationale and challenges to intervention sustainability]: Staff and site investigators were uncertain…	Providers negative opinions about the intervention given the fact that their clinics already operate strong evidence based interventions and FI wouldn't be impactful/necessary. Uncertainitu and concerns over public health rationale, uncertainity of financial sustainability and upscaling		Reflective motivation	Beliefs about consequences	Education, Persuasion, Modelling	Communication/marketing, Guidelines, Regulation, Service provision	I’m not sure it truly led to any significant increase in linkage beyond what we did. . .Part of that is we have such an active linkage to care methodology in place to start.Where you know,when folks are tested, they’re escorted over personally in to the clinic and into care immediately. [Investigator] I would say less would be better because A, we could be funded for longer and B, I feel like it’…
23	Warnock 2025		[Burnout in light of intervention and already demanding role] Another site leader discussed the inherent challenges faced by community-based counselors or case workers due to their role. In the context of the challenges PrEP navigators face in their professional roles, site leader expressed concern about burnout among their staf. PrEP navigators as well recognized that the nature of their jobs of…	Strong identification with caregiving role, going beyond formal responsibilities leading to deep emotional investment in client outcomes and acknowledgement of emotional toll and burnout risk.		Automatic motivation	Emotion	Incentivisation, Enablement	Fiscal measures, Guidelines, Service provision, Environental/social planning	"All my participants use my work, my office as their address. They don’t miss their mail. They don’t miss their appointments. I make sure I stay on it because it could be the littlest thing. So, I make sure that they don’t miss anything. And that’s like a big thing for me.” PrEP navigator 2: “But that puts you at higher risk for burnout too.”
25	Powell-Jackson 2009		[Misalignemtn of icnentive amount with population needs] A diverse group of respondents also reported that funds had been inadequate to pay beneficiaries,.	Inadequate incentive amount (of no use) relative to population needs.		Automatic motivation	Reinforcement	Environmental restructuring, Incentivisation	Guidelines, Fiscal measures
25	Powell-Jackson 2009		[ incentive distribution challenges , mistrust and conflict] Second, a failure to give the incentive created a perception that health institutions were withholding money, leading to friction and mistrust of health personnel. In one place, the programme was put on hold because there were inadequate funds, and staff were worried about the consequences of only giving cash to some women:	fear and emotional stress due to unmet expectations and potential conflict. Challenges created due to failure to give the incentive where perceptions of institiutions witholding money, friction and mistrust grew.		Automatic motivation	Emotion	Coercion, Enablement	Guidelines, Regulation, Service provision	"If we distribute the outstanding incentive of last year from February onwards we need about five hundred thousand rupees but we have received only one hundred thousand. If we distribute this amount we are sure to be beaten by women."
25	Powell-Jackson 2009		[Top-down drcusuin making excluding local input] There was frustration that the central level did not consult with the district level in the development of plans, even when the district had taken the initiative to plan how to spend the budget.	Exclusion of district level staff from intervention planning and following a top-done decision making process		Reflective motivation	Role and identity	Education, Modelling, Enablement	Communication/marketing, Regulation, Service provision
25	Powell-Jackson 2009		[Percieved unfariness and moral conflict on restrictive eligibility criteria, and potential discrimination against those most in need] had specific concerns with the eligibility criteria, questioning the logic of only giving the cash to women with two or fewer children. Respondents felt that this indirect discrimination, partic ularly against poorer women, opposed the overall aim of the programme…	Providers's moral conflicts : percieved unfairness, consequences in terms of potentially socially exclusion those most in need e.g. eligibility criteria of women with 2< children oppossing the aim of the intervention		Reflective motivation	Beliefs about consequences	Education, Persuasion	Communication/marketing, Guidelines, Regulation, Service provision	"The poorest of the poor are excluded from the incentive because the poor are the ones who have more thantwo children. So there should not be any parity condition"(District health office, Hill, Key informant interview) "Women having more babies are subject to higher risks and they are deprived of the incentive." (District stakeholders, Plains, Focus group discussion) "If safe motherhood is women'…
27	Sidney 2016		[ Incentive amount inadequate to costs incurred due to "hidden" costs] Some women conveyed conflicting emotions when talking about the costs associated with a facility-based delivery and receiving the benefit. They questioned the appropriateness of having to pay for some of the delivery services, but felt the program provided cash to pay for these elements thus avoiding additional OOP expenditure…	Conflicting emotions due to "hidden costs" associated with target behaviour and receiveing the benefit e.g. extra OOP expenses, feeling obliged to pay rewards to staff, fees to open bank account. Anger and Fear of being scolded from staff for not following advice on behaviour change	significant	Automatic motivation	Emotion	Persuasion, Incentivisation, Enablement	Communication/marketing, Regulation, Service provision, Evironmental/social planning	This non-JSY participant was irritated by the ASHA’s reprimanding for having an unintentional home birth. “I became angry because she [ASHA] was scolding me…[ASHA said] You should have informed me and now hospital officials will say that I did not bring you in time. Delivery cannot happen so fast…”– District 1 Home Delivery, Age 21
27	Sidney 2016		[ negative perceptions towards quality of care at public facilities ] Around half of the women were content to deliver in the public sector if they felt healthy and thought the delivery would be ‘normal’. Otherwise they would prefer to seek care from a facility offering what they perceived to be a higher quality of care in the private sector. This ‘common sense’ norm was expressed among JSY parti…	Clients negative perceptions of public facilities due to potentially unfavourable consequences of delievry		Reflective motivation	Beliefs about consequences	Education, Persuasion	Communication/marketing, Guidelines, Service provision	When asked where this JSY participant would deliver if she became pregnant again, she succinctly said, “We will go to [public] hospital but if I feel very weak, I will go to the [private] facility.” – District 1 JSY Participant, Age 20
28	Gupta 2018		[ Limited providers incentivisation] insufficent cash incentive to provide to pay for service. The conditional cash incentive given to providers against the task was much lower than the expenditure they incurred while helping pregnant women to access facility-based care	Providers not adequately compensated for their work on the incentive scheme relative to the demands of their role.		Automatic motivation	Reinforcement	Incentivisation	Guidelines, Fiscal measures, Service provision	“Our allownce should be increased. It is hard to perform our duties with less money.” (ASHA)
29	Baba-Ari 2018		[ FI insufficent motivation to change] Many respondents regarded the cash incentive as insufficient motivation with some indicating this as a deterring factor against continuing with the programme. Cash may not be a sufficient incentive for some non-beneficiaries.	Cash incentive as insufficent to drive behaviour change/ continue with the programme.		Automatic motivation	Reinforcement	Environmental restructuring, Incentivisation	Guidelines, Fiscal measures	“…of course it is why I decided to come, I don’t work and my husband works very hard to feed us, anything extra will at least help me buy something for the house, but it’s not much you understand, they should give something more, you can’t really buy more than one or two things...”
29	Baba-Ari 2018		[ Fear of mistreatment by providers as a barrier of engagment to incentive scheme] There were also concerns about the quality of care received at the facilities and fears of poor treatment by health workers.	Fears of poor treatment by health ptoviders.		Automatic motivation	Emotion	Persuasion, Modelling, Enablement	Communication/marketing, Regulation, Service provision, Evironmental/social planning	“If you get a wicked one (midwife) to deliver you, she will just be shouting at you for no reason, many women will tell you, and you can’t do anything because ...I will prefer to give birth at home at least I have my privacy and nobody will be shouting at me”
29	Baba-Ari 2018		[No intention to join the shceme due to lack of trust in the government initatives] Negative perception of government was an important deterrent. One participant (non-beneficiary) had no reason for not registering for the CCT. She felt no need of going to the hospital as her previous children had all been born at home without complications.	Negative perceptions of government intiatives and beliefs that the intervention is unecassary due to poor outcomes of delivery in public service.		Reflective motivation	Beliefs about consequences	Education, Persuasion, Modelling	Communication/marketing, Guidelines, Regulation, Service provision	“(laughing...) why should I believe them, someone will just come and tell you they will give you money just go to the hospital, even if it is true, you will suffer and go today,tomorrow they will say sorry, the money has finished, no money for you…” “Is it now after my five children that they will say comeand collect N5000, when my last born was sick and I was borrowing money no government gave m…
30	Contractor 2018		[Gamming of the system- "Fudgig data"] We noted that not all deliveries that were recorded as ‘institutional delivery’ were necessarily conducted in a public health facility. Several women who actually delivered at home were later taken to the health facility and recorded as institutional deliveries so that they could avail of the JSY incentive.F	Perverse incentive and reinforcing behaviours of misreporting to receive the incentive as the system unintentionally rewards a workaround		Automatic motivation	Reinforcement	Environmental restructuring, Coercion	Guidelines, Regulation, Fiscal measures	" She was not interested in going to the hospital for delivery. They say, “We are Adivasi people, we don't want to go outside and other male member shouldn't touch us.” I told her, “We are all present for your benefit why shouldn't you listen to us? Both mother and baby will be safe in the health facility.” When she was not convinced I spoke to her husband, “If anything happens the family will su…
30	Contractor 2018		[Preocupation with achieving targets and coercion] There was a preoccupation with ensuring “coverage” of services for every single pregnant woman, outreach workers also used coercive tactics to achieve this. In order to get women to come to the VHND, the ANMs and AWWs at the local level instituted their own conditionalities. [Exclusion of traditional service providers] Community members consult a…	Preocupation with providers/outreach workers achiveing targets and ensuring "coverage" of services leading to use of coercsion. Exclusion of traditional service providers e.g. healers from decision-making/planning of the intervention as providers considered them negative influncers while the villagers identify most with them.		Reflective motivation	Role and identity	Education, Persuasion, Modelling	Communication/marketing, Guidelines, Regulations, Service provision	“We threaten them that if they do not come, they will not get their take-home ration. We know this is not true, but they believe us. What can we do, we will be in trouble if they don’t come” (interview with ANM).
30	Contractor 2018		[Lack of trust due to adverse experiences and accountability failures] A significant factor that affected women’s decision whether to choose institutional care was that of others’ or their own adverse experiences .[ A death incident] What is worse; it has causes; An instance was mentioned when doctors had attempted to a broker deal with the family of a deceased woman, in order to avoid blame. In …	Beliefs of poor outcomes if delievered in public institutions and staff attempting "broker deals" in case of complication. Negative perceptions of government and their support to normal individuals.		Reflective motivation	Beliefs about consequences	Education, Persuasion, Modelling	Communication/marketing, Guidelines, Regulation, Legisation, Service provision	According to the ASHA, “they promised to get the family the JSY benefits and the doctor who was in charge offered to pay the family 20,000 rupees for raising the children. The family accepted his offer. However after a few months, the doctor disappeared, and was not heard from again.” The woman’s husband felt cheated. He said: Why should we go to hospitals when they do not care for us? If my wife…
31	Dickin 2022		[ Non-adherance to FI protocol by providers due to cease of incentivsation] The remaining 74% of payments required involvement of the field implementation partner to manuallyrecord a visit and trigger a transfer. For this to happen, a participant or nurse needed to place a phone call to the field implementation partner and report a visit. Compared with 27% of visits in 2018, only 3% of visits wer…	Providers no longer adhering to the incentive scheme protocol once their own incentive ceased leading to implementation halt and delays in transfers. Providers incentive for each participant reported as inadequate compared with the additional work.	significant	Automatic motivation	Reinforcement	Environmental restructuring, Coercion, Incentivisation	Guidelines, Regulation, Fiscal measures, Service provision	‘Someone at 3 weeks’ time, the PDT (pregnancy test) is positive; the client is here and wants to start ANC. You are not even sure of the pregnancy and the client is insisting.’
31	Dickin 2022		[Decreased acceptability as FI was not delivered as expected] Acceptability by participants was mainly impacted by the A) ways that the intervention delivery deviated from the planned activities. Despite initail enthusiasm, most participants described a situation where their cash transfers for attending appointments were not received automatically at the facility visits. Participants then asked n…	Decreased acceptability due to deviations from intervention delivery from planned/expeced e.g. delays, waiting times at clinic, in recieveing the transfers	significant	Automatic motivation	Emotion	Persuasion, Incentivisation, Enablement	Communication/marketing, Guidelines, Regulation, Service provision, Evironmental/social planning
31	Dickin 2022		[Providers avoiding card taps- Rationalsed dishonesty- to evade conflict] Providers not tapping the cards to avoid conflicts with participants over delayed transfers due to the faulty system, including sometimes telling participants the trial had ended; new staff at facilities who did not want to participate due to challenges with delayed transfers. No training for new staff; and the card reader …	Providers not issuing incentives, misleading clients that the shceme has ended due to beliefs of system failure, irrationality/ unsustainability and witholding incentive devices to avoid theft . Decreased acceptability on incentive form change from transfer to cash due to inconvience to pick up cash, mistrust in accurate distribution or getting their incentive in full.		Reflective motivation	Beliefs about consequences	Persuasion, Modelling	Communication/marketing, Guidelines, Regulation, Service provision	‘I will understand that the system failed but what about the client? The client is seeing it as if it is me who has eaten that money, which is not the case.’ ‘But now they are not getting the funds, yes…They are saying ‘now this thing…’ some of them even have the card but they do not want to produce the card, because it does not make any difference.’ They should take it that it’s their role to at…
34	Brown 2019		[Target behaviour is not a priority: Norms and competing priorities] Some responders also reported that healthy eating was not a priority for everyone. e.g. there may be other competing priorities based on social factors that are viewed as more important or there may be basic challenges such as the inability to shop for groceries. This was particularly thought to be the case for people with littl…	Target behaviour ( healthy eating) was not a priority for everyone where other pressing social factors/challenges are more important, particuluraly for deprived/vulnerable populations e.g. alchol disorder.		Reflective motivation	Goals	Persuasion, Enablement	Communication/marketing, Service provision, Environmental/social planning
35	Garner 2020		[Feelings of judgments and stigma on incentive scheme use] Stigma experienced during DUFB participation; it emerged in at least 1 Utah focus group. A few participants admitted to feeling embarrassment related to the program, but that the market was a less judgmental venue than the grocery store. Among those who felt embarrassed by the program, there were some for whom this was because of the obvi…	Stigmatisation, demoralisation feelings of judgement and feelings of embaressment when using the scheme where distinction between scheme users and people on benfits is vague mainly due to setting e.g. market vs store	Minor	Automatic motivation	Emotion	Modelling, Enablement	Communication/marketing , Service provision, Evironmental/social planning	When you tell people about the food program or this, they think it’s government supplemented, it’s like, “Oh, there go my tax dollars.” Oh that’s more money, that’s my tax dollars, and it’s, like, this isn’t your tax dollars. People don’t understand that, and it’s a shame, because I think sometimes people look at you different because of it. But they don’t understand that it’s not funded by the g…
40	Silva 2023		[Delayed reimbursment time] Many respondents also commented on the time it took for reimbursement. A couple of vendors said their biggest challenges were “Payment"	Delayed providers reimbursement		Automatic motivation	Reinforcement	Environmental restructuring, Incentivisation	Guidelines, Fiscal measures, Service provision	[it is a] two-week delay” and “Wait time to get money back. [It takes] about a month.”
42	Moore 2024		[Students embarassement of rewards] of the other difficulties relating to the process of claiming rewards: 2) embarassing if small prizes recived in front of other peers	Students embarssement recieveing the rewards in front of their peers		Automatic motivation	Emotion	Persuasion, Modelling, Enablement	Communication/marketing , Evironmental/social planning
42	Moore 2024		[Far-fetched FI targets] Pupils reported that criteria to receive the rewards seemed far fetched. Some of the rewards (particularly those with the highest monetary value) seemed unattainable during the time frame of the scheme	Students believed the behaviour targets were far fetched and the incentives seemed unattainable during the time frame.		Reflective motivation	Beliefs about consequences	Persuasion, Modelling	Communication/marketing, Guidelines, Service provision	"‘Does it actually take about 900 years though to get a big prize?’"
43	Reese 2024		[Roles ambiguity challenges between SPS coaches and study coordinators] The role of the PUSH trial coaches was to engage eligible participants in SPS and help them implement solutions for fluid consumption. To avoid bias in outcome ascertainment between the intervention arm and control arm, the coaches’ role did not include asking about stones or evaluating the clinical information. The coaches’ …	Roles ambiguity challeges between different types of providers in the intervention pathway leading to confusion and inability to keep responsibilities separate.		Reflective motivation	Role and identity	Education	Communication/marketing, Guidelines, Regulation
44	Zulman 2013		[Coersion to join the scheme] Percived feelings of being forced to join. program indicate that the program’s effect came at a cost of ill-will from some individuals who felt coerced to participate. (31%)	Feelings of being forced/coerced to join the programme which made the programme's effect come at a cost of "ill-will"		Automatic motivation	Emotion	Persuasion, Enablement	Communication/marketing, Guidelines, Regulation	“I don't enjoy being forced to sign up for something just because I don't fit into outdated guidelines for healthiness. Could I afford to lose some weight? Yes. But I'd prefer to do something about it because I wanted to, not because it was required.”
45	Gilson 2017		[Intervention incongurrent with beliefs- limited incentive significance ] consensus from interviews indicated that improving health and wellbeing for its own sake, rather than for external reward, was the major determinant of change. The monetary value of the incentive (which was not significant by driver standards) may also have played a role in this dynamic. Consistent with these viewpoints, de…	insignificant incentive amount to target population to act as a driver for change.		Automatic motivation	Reinforcement	Incentivisation	Communication/marketing, Guidelines, Service provision	“The biggest reward is getting the result we want at the end, and it is to be a healthy driver. To achieve that, we don’t need $100 or $200 here and there.”
45	Gilson 2017		[ Conflicting viewpoints of parties involved on behaviour change responsibility] management comments on ‘moving forward’ suggested that choices to effect and sustain healthy changes were up to drivers, while driver viewpoints tended to contrast with management perspectives. This last quote reflects the consensus put forward by drivers that the industry needed to take more responsibility for the h…	Conflicting viewpoints of clients/providers on whom the responsibility/choices to effect and change health was on.		Reflective motivation	Role and identity	Education	Communication/marketing, Guidelines	“It is not so much the organisation’s responsibility it’s the individual’s. We can only do so much." “We would be more driven to try and achieve more if something came from the industry and they said ‘we are going to invest in this way’ to give you more time on the run. But the industry is so ‘hard-nosed’. The bottom line is dollars.”
46	Corder 2021		[ Implementation inconsistencey and demotivation due to failed/ delayed/unreliable reward system] Although the intervention protocol indicated that mentors would do this, this was not implemented at every school, with form teachers or GoActive contact teachers tasked with reward distribution. Although rewards were distributed to the GoActive schools at the start of the intervention, participants …	Disappointment and disengagement due to unfulfilled rewards and lack of action on reward distribution		Automatic motivation	Reinforcement	Environmental restructuring, Coercion	Guidelines, Regulation, Service provision, Environmental/social planning	" I’m disappointed with that to be honest . . . I logged all my points to get my stuff ages ago and they haven’t come yet." S3: At the end no one [Year 9 students] really cared because like, you know how you could win things like jumpers? At the very beginning I won a jumper and I asked for it, and they were like, ‘Yeah, I’ll get it for you’. Researcher: Who? S3: Our mentors . . . S S4: We were n…
47	Jose 2022		[Fear of utilising the service due to antisocial behaviout] Anti-social behaviour on bus, so clients feel the need to pick certain times to catch a bus.	Fear of service utilisation due to anti-social behaviour on bus.		Automatic motivation	Emotion	Enablement	Environmental/social planning, Service provision	"But the route I’m on, …. they’re drinking alcohol on the bus and stuff … So, that’s why I’m saying I pick which buses to catch and at what times. "
48	Hagedorn 2014		[lClinicans resistance to rapid urine testing used by the scheme] A major barrier to integrating the intervention into clinic processes at 1 facility was that the clinicians did not want to rely on the rapid urine test cups for clinical testing of substance use. Instead, they preferred to send samples directly to the laboratory. This created a great inconvenience for patients who were often asked…	Tests used by the scheme to validate behaviour misaligned with clinicians professional standards leading to repeated testing and inconveniencing patients.		Reflective motivation	Role and identity	Persuasion, Modelling	Communication/marketing, Guidelines, Service provision
49	Hartzler 2015		[Resistance and Hesitancy due to anticipated administrative burden] initally, providers resisted adding CM procedures to busy clinical interactions early in treatment. The administrative burden of adding CM procedures to busy clinical interactions early in treatment, the added time required of CM procedures, was noted and another identified additional staffing resources needed to support internal…	Providers resistance/hesitancy to implement intervention due to concerns of added admin load, staffing issues to an already busy settings. Concerns over sustainability due to staff shortage/flow of gift cards.		Reflective motivation	Beliefs about consequences	Education, Persuasion, Modelling	Communication/marketing, Guidelines, Service provision	“Well, as for challenges that [the CM intervention] presents…it is an extra component added to an already loaded initial treatment burden that counselors have with folks coming into treatment. So, that is an extra burden. But it seems to be worth it to staff, I hear good things from them about how rapport with new patients is better now”. “Admittedly, I went into this with trepidation. Asking my …
51	Brolin 2017		[Roles conflict: Juggling between "hats"]There were also complexities related to accommodating multiple insurers. MBHP is one of many payers for detoxification services in the Commonwealth. Study RSNs were often required to wear both the hat of a community support worker for non-study clients and the RSN hat for study-eligible clients. The added burden of juggling a mixed caseload, coupled with t…	Providers juggling between hats to accommodate multiple clients with different insurance plans e.g. community support worker and study nurse leading to increased caseload		Reflective motivation	Role and identity	Education, Enablement	Guidelines, Regulations, Service provision, Environmental/social planning
51	Brolin 2017		[Shaky buy-in, Negative providers attitudes about incenitves for this population] The research team engaged staff at the provider organizations to get their input and buy-in. The administrators at the intervention providers were very interested in participating and were engaged in the design of the incentive component. This attitude, however, appears not to have been shared by all of the RSN staf…	Ground-level providers mixed vies on incentives to motivate among those ambivalent or resistant to recovery and felt strongly that the clients who were earning incentives would have engaged in these behaviors anyway.		Reflective motivation	Beliefs about consequences	Education, Persuasion, Modelling	Communication/marketing, Guidelines, Regulation, Service provision
51	Brolin 2017		[Hesitancy/inaction to respond to new demands] For most of the intervention providers, utilization of community support services prior to the launch of the study had been in decline or stagnant. Hence providers delayed staffing desite anticipated increased workload. As a result of this study, providers needed to retool or expanded their behavioral support services within the detoxification site b…	Delayed staffing despite anticipated workload increase as services utilisation had been stagnant prior and widespread hesitancy to hire more people.		Reflective motivation	Intention	Persuasion	Communication/marketing, Regulation, Guidelines
52	Becker 2019		[Percieved lack of demand as a barrier to adoption] staff attitudes were cited as issues to adoption including perceived demand including lack of admin .Analyses of provider-reported barriers confirmed the hypothesis that the SSL would be less effective among providers that perceived more patient-level barriers, perhaps due to the SSL’s explicit focus on provider- and organization-levels.issions …	Staff Percieved lack of demand as a barrier to intervention adoption due to high perciption of barriers at patient-level e.g patient unwillingness		Reflective motivation	Beliefs about consequences	Persuasion	Communication/marketing, Service provision
53	Desrosiers 2019		[ Unpersonalised tokens that are easy to lose and mean less] Different participants reported that the tokens had little symbolic value to them. They asserted that the tokens were not personalized which made them cumbersome and easy to lose.	Little symbolic value of impersonalised tokens		Automatic motivation	Emotion	Persuasion, Incentivisation	Communication/marketing, Environmental/social planning	"It's bulky and they are not personalized. It's an object, which in fact is connected to nothing concrete, and we can lose them too."
53	Desrosiers 2019		[One-sided partnership- limited active participation of co-investigators] Furthermore, as the co-investigator conducted the drawing sessions and the purchase of gifts they felt that they hadn’t had an active participation in its implementation. That they could have further promoted the contingency management during the recruitment process if they had been more involved in the organisation, planni…	Limited participation/involvement of ground-level staff in the intervention implemntation where they expressed they need to be more involved.		Reflective motivation	Role and identity	Persusion, Modelling	Communication/marketing, Guidelines, Service provision
53	Desrosiers 2019		[initial skepticism towards CM benefits and Ethical fit] Health professionals’ perspective on the acceptability of the contingency management. During the first consultations with the health professionals of the COD program, they demonstrated openness to the possibility of implementing this approach with their clients but also expressed doubts about the real benefits of this approach. The health p…	Providers skepticisim towards CM benfits, and concept/rationale behind paying a patient to seek a treatment and its ethical fit.		Reflective motivation	Beliefs about consequences	Education, Persuasion, Modelling	Communication/marketing, Guidelines, Regulation	"I was sceptical at first, because I wondered if it was necessary. If there were no other acceptable privileges that could’ve been implemented instead."
54	Becker 2021		[Increased percieved resistence to CM implementation] Not surprisingly, as caseloads increased, perceived resistance to CM implementation increased	Resistence and frustrations due to increased caseloads secondary to the programme		Automatic motivation	Emotion	Incentivisation, Enablement	Fiscal measures, Environmental/social planning, service provision	“I think sometimes when programs are short-staffed, clinicians have more on their plates than they typically would and they do not always want to do that one extra thing. They just feel like everything’s like oh, it’s just one more thing. ”
54	Becker 2021		[High-risk popualtion and conflict of the intervention benefits vs safety] Notably, several respondents commented that their patients were especially vulnerable to COVID-19 due to a variety of risk factors includ- ing smoking, unstable housing, mental health issues, and substance use.. One OTP counselor shared her view that the program’s priority had to be limiting the patients’ exposure to COVID…	Concerns about the "unknown" especially when dealing with vulnerable populations at high risks e.esmoking, unstable housing, mental health issues, and substance use in light of COVID-19 spread and intervention interactions.	significant	Reflective motivation	Beliefs about consequences	Education	Communication/marketing, Guidelines, Service provision	“it’s the unknown of basically what’s gonna happen —now we have close to 600 patients in the program. We’ve really expanded. Now it’s about keeping them safe…. ”
56	Winograd 2022		Initial hesitancy with reset mechanisms and enforcement of CM mechanisms ] Clinicians discussed initial hesitation with enforcing the reset contingency for non-adherence to the target behavior. After gaining experience doing so with an appropriate explanation to clients, they became more comfortable with resetting clients and reported seeing its importance.	Providers Initial hesitation in enforcing reset CM for non adherence with behaviour due to lack of experience/ discomfort		Reflective motivation	Beliefs about capabilities	Education, Enablement	Communication/marketing, Guidelines, Service provision
57	Green 2023		[Hesitancy toward CM/FI - Philosphical objections and attitudinal shift] A recognition that CM is an attitudinal shift from abstinence-based treatment models. Staff at FQHCs shared how their organization had addressed staff hesitancy toward non- abstinence-based treatment models during implementation of MOUD. State-approved treatment providers, who had less prior experience with the provision of …	Expected attitudinal shift from usual absitence treatment models expected from staff as a challenge. Misalignment of training with diverse population of providers with various professional duties and expertise		Reflective motivation	Role and identity	Education, Persuasion, Modelling	Commuinication/marketing, Guidelines, Regulation, Service provision	" And so, we’re accustomed to them not being able to have any violations on the UDS. For us to be able to incentivize and reward behavior for a negative stimulant UDS, but to still have alcohol or other things showing up on a UDS, that for me is a little challenging. I do understand the broad picture and the logical concept behind it but it’s just a different way of thinking" "To me it seemed con…
58	Curran 2023		[Mixed staff views on CM; ethical concerns] Ethical concerns and seeking evidence as a driver for non-adoption. Concerns about who should deliver CM, potential impacts on the therapeutic relationship, ethical concerns. Did not deliver [Service fit, and its impact on thrapeutic relationship ] The majority of EIS staff were concerned about the possible negative impacts of urine-testing and payment …	Staff express discomfort with CM being inconsistent with their personal or professional values and usual ways of working and departure from traditional practices Concerns that CM delivery conflicts with therapeutic values and need for another provider to implemtn the service.		Reflective motivation	Role and identity	Education, Persuasion, Modelling	Communication/marketing, Guidelines, Service provision	One staff member admitted they would not want to use CM in their personal practice even if there were good evidence of effect: “I’m accountable for my own practice . . . I personally wouldn’t feel very comfortable with it, getting into an area of work where I’m doing [urine drug screens] with someone, giving them money. It’s a very long way from the way that I’ve worked with people. . . I’d be in…
58	Curran 2023		[ Limited evidence as a driver for non-adoption] However, most participants who voiced concerns (and reasons for non-adoption) balanced this by suggesting this could be over-ridden by evidence of effectiveness. [Challenges to enforce abstinence target due to mixed-evidence and client education levels - fear of being percieved as not scientifcally motivated] Staff felt challenged and ill-equiped w…	Providers resistance of intervention adoption and concerns of being challenged light of lack of evidence that it works, pariculuraly facing a young highly educated patients with their own views on cannabis use. Providers concerns over seeming paternalistic/coercive and potential erosion of rust subsequent to "policing" of drug use. Ethical concerns e,g, discomfort with monetary incentives, which …		Reflective motivation	Beliefs about consequences	Education, Persuasion, Modelling	Communication/marketing, Guidelines, Regulation Service provision	“I guess if it works . . . if the data shows that it has a big impact, then, you know, and it’s cost effective, then why not? So, I think we just feel uneasy about it involving money.” (staff member 2, focus group 2) “[some staff] have a slight objection to kind of urine testing people. So, they think that, you know, you should go with what the client tells us. So, if the client tells you they’re…
59	Cohen 2023		[Deflating Prize draws] Staff noted som patients were not engaged by the VCS coupons; A slip of paper drawn from the prize bowl saying “good job” rather than a monetary reward and saw that this could be deflating.	Deflating and disengagement from the scheme activities when pullin g! good job" slips rather than the monetary incentive		Automatic motivation	Reinforcement	Environmental restructuring, Incentivisation	Guidelines, Communication/marketing	"Well, you know I mean it was like you know almost like a trick, they got tricked. You know they were expecting to get some like a tangible reward and only got the good job. So, a lotta times when they pulled those you could see the disappointment on their face”
59	Cohen 2023		[Negative perception of the intervention and objections toward the "cash" incentive"] Staff noted that some patients were not engaged by the VCS coupons; and one patient expressed concern about using cash as prizes. [Privacy concerns on integrating the intervention within HIV clinic] Staff expressed privacy concerns about integrating alcohol treatment within the HIV clinic. One staff member share…	Negative perceptions/concerns about using cash as prizes due to potential misusee.g. you can buy drugs with cash/alchil , providing monetary prizes to people with a substance use disorder. Providers provacy concerns about integrating the intervention e.g. alchol in HIV clinc due to beliefs of patients reluctancy to discuss their alcohol use if the intervention was linked with their other medical …		Reflective motivation	Beliefs about consequences	Education, Modelling	Communication/marketing, Guidelines,Regulation, Service provision	“When I was trying to recruit patients and I told them that it would be Canteen vouchers like commissary vouchers, some people were like oh that’s it?”Patient participant 2 stated a preference for specific types of incentives and against cash: “Yeah. Yeah. But I wouldn’t recommend cash. You know what I’m saying? And I, I think I see …you know, you can go and, you can buy drugs with cash. … buy dr…
60	Parent 2023		[Inadequate incentive magnitude misaligned with evidence] At the time of the writing of this paper, the Substance Abuse and Mental Health Services Agency (SAMHSA) capped the use of State and Tribal Opioid Response funding for CM reinforcers at $75 per person per year (Knopf, 2021). A key principle in the mechanism of positive reinforcement to induce behavior change is that the reinforcer provided…	Inadequate incentive magnituded misaligned with evidence of effective incentive due to polcieis. Providers and clients did not find prefer remote delivery of the intervention		Automatic motivation	Reinforcement	Environmental restructuring, Incentivisation	Guidelines, Fiscal measures, Service provision, Environemental/social planning
60	Parent 2023		[Clash of treatment philosphies and organizantional culture impact on implementation] CM protocol incongurrent with treatment approach; Concerns about CM contradicting existing philosophy affected sites’ buy in and that stigma toward patients as a CM implementation barrier resulting in implementation inconsistensies we noted that some providers expressed tendencies in the other direction (i.e., a…	Many providers operating under harm reduction models found CM's abstinence-based rewards incompatible with their approach. also Clinicians in some settings viewed CM as "rewarding" substance use, creating ethical concerns reducing buy-in and led to inconsistent application. Due to these conflicts, some programs opted out entirely, seeing CM as a poor fit for their treatment framework.		Reflective Motivation	Role and identity	Education, Persuasion, Modelling	Communicarion/marketing, Guidelines, Regulation, Service provision
60	Parent 2023		[Limited percieved accuracy of behaviour validation] Some providers reported a) concerns about drug screen accuracy	Providers had concerns over accuracy of drug tests.		Reflective motivation	Beliefs about consequences	Education, Modelling	Communication/marketing, Service provision
61	Hallgren 2023		[lack of motivation and early disengagment] participants who disenrolled early cited lack of motivation and intetrest among others. 7% early disenrollment due to lack of motivation. [Frustrations due to complex and lenghty Mhealth Processes]	limited interest and motivation of clients leading to disenrollement. Providers frustrations due to lengthy and complex mHelath and intervention processes.		Automatic motivation	Emotion	Persuasion, Modelling, Incentivisation, Enablement	Communication/marketing, Service provision, Environmental/Social planning	“Some patients really struggled to get in and remain engaged in the program….It was really frustrating, and didn't allow us to strike while the iron was hot. For some people, there definitely were technological and logistical issues, in terms of using the app and getting the video right and all of that. Even utilizing some of the tox screen swabs initially [was challenging]. So sometimes that see…
61	Hallgren 2023		[Barriers to mhealth preperadness for uptake] Reported by clinicians including: Concerns about incentive structure, Implications of repeat treatment and Perspectives on sustainability and cost effectiveness. User reported barriers included: percieved Delay in treatment effect and Limited effectiveness for abstinence for some patients leading to low engagment	Providers concerns over incentive structus, implications, sustaianbilitu and costs. Clients percieved delay in treatment effect and limited effectivness of intervention for abstinence leading to disengagment.		Reflective motivation	Beliefs about consequences	Education, Modelling	Communication/marketing, Guidelines,Regulation, Service provision
61	Hallgren 2023		[Lower than expected incentive value]	Reinforcement amounts lower than expected value which led to reduced motivational impact of rewards		Automatic motivation	Reinforcement	Incentivisation	Guidelines, Fiscal measures, Service provision
64	Jakubowski 2024		[Lack of clear objectives, planning or prioritazation] When reflecting upon leadership commitment, two OTPs described their leadership as having a “passion” or “pushing” for the digital CM platform but identified a lack of strategies or long-term plans to implement the platform in their setting (Sites 101 and 106). One OTP leader noted that they had not heard anything nor a “clear direction from …	Lack of strategies/long term plans/ clear direction or prioritisation from (high level) providers to implement the platform in their setting.		Reflective motivation	Goals	Education, Modelling, Enablement	Communication/marketing, Service provision, Environmental/Social planning
66	Research Triangle Institute and National Academy for State Health Policy 2017		[Revised targets and goal-setting misalignment] California initially planned to target its smoking cessation program to Medicaid beneficiaries that had diabetes and other chronic diseases. Within the first 6 months of implementation, California changed its program to include all Medicaid beneficiaries who smoked and not just those with chronic diseases. This change was driven by concerns that the…	(unrealistic) Goal-setting misalgnment/ revised target with the real world lconstraints leading to frequent change ofplans e.g. eligbility, driven by concerns of not reaching target enrollment goals.	significant	Reflective motivation	Goals	Modelling, Enablement	Service provision, Environmental/Social planning
66	Research Triangle Institute and National Academy for State Health Policy 2017		[Concerns about the controversial nature of the intevention] Challenges that arose were in part due to States’ concerns in implementing randomized controlled incentive programs for the Medicaid population. This type of program was a new concept, and some State governments were initially concerned that these programs would be controversial. California worked closely with its Office of Public Affai…	States concerns in implementing incenitve programmes for medicaid population, it being a new concept and its conterveersial nature. E.g. privacy breach risk, public perception		Reflective motivation	Beliefs about consequences	Education, Persuasion, Modelling	Communication/marketing, Guidelines,Regulation, Service provision

## Sheet: Codebook
COMB	Code	TDF	Code
Physical capability	1	Skills	1
Psychological capbability	2	Knowledge	2
		Memory, Attention and decision processes	3
		Behavioural regulation	4
Physical opportunity	3	Environmental context and resources	5
Social opportunity	4	Social influences	6
Reflective motivation	5	Beliefs about consequences	7
		Beliefs about capabilities	8
		Role and identitiy	9
		Optimisim	10
		Goals	11
		Intention	12
Automatic motivation	6	Emotion	13
		Reinforcement	14
Income Status	Code
High	1
Middle	2
Low	3
Behaviour	Code
Smoking	1
Other	2

## Sheet: CHI- B- COM
Author, year	Income status	Behaviour	Barrier	COM-B	COM-B Code	TDF	TDF -Code	Intervention functions	Policy Categories	Quote
Lutge 2014	Middle	Other	[Logistical challenges: vouchers supply and administration, delays and extra costs imposed on patients] Vouchers not always available to be distributed for patients on their appointed clinic dates. Vouchers were sometimes not available because they had not been delivered on time to the clinic by investigators. Although the investigators visited the participating clinics every four to six weeks, c…	Physical opportunity	3	Environmental context and resources	5	Environmental restructuring, Enablement	Environmental/social planning, Service provision	‘Sometimes it happens that you come for the voucher and find there are no vouchers. They say come on the following or the third day’
Lutge 2014	Middle	Other	[Percieved unfairness and perversity of FI strucute ] patients, nurses, and shop personnel were concerned that only certain patients (those with pulmonary TB) were eligible to receive the voucher. They felt that this was unfair, given the depth of deprivation experienced by some patients. Managers of Tb Programme percieved it as problem dute to fear of acting as perverse incentive.	Reflective motivation	5	Beliefs about consequences	7	Education, Persusion, Modelling	Communication/marketing, Guidelines, Service provision	I do hear them saying that the voucher is given tothose with PTB [pulmonary TB] only … They arecomplaining - you know people they also want to get the voucher, they are not happy that some people arereceiving it while others don’t’ ‘If you could also try and help the others not just the TB patients. We also have people sick besides (those)diagnosed with TB’ ‘If you target for example the TB patie…
Lutge 2014	Middle	Other	[Non adherence to protocol: Rationning of incentive distribution/receipt against protocol eligibility criteria driven by perceptions of equity and social justice] Nurses’ tendency to ‘ration’ the vouchers, only giving them to the most needy. Many patients and nurses believed that vouchers should not be given to patients who were relatively better off financially. As a consequence of such, nurses …	Reflective motivation	5	Role and identity	9	Education, Persuasion, Modelling	Communication/marketing, Guidelines, Regulation	‘I would decide by looking at who is needy, considering their social problems, then I will give … like if they do tell me they can’t take pills on an empty stomach then I will give considering their background…but those who are working I wouldn’t give …’ ‘Sometimes I do not ask for it, if I see that I do have something’
Wingfield 2015	Middle	Other	[Lack of availabe evidence on TB-specific FI Uncertainity regarding the main objective of the FI and planning of the Cash transfer size/ design ] There was a lack of available evidence and thus clarity when prioritising the output of the cash transfers in these TB-affected households. Thus, deciding on the cash transfer amounts and timing was difficult. The lack of published evidence of similar s…	Psychological capability	2	Knowledge	2	Education	Guidelines, Regulation
Wingfield 2015	Middle	Other	[Lack of expertiese in cash transfer interventions]Project conditions requiring all members of the TB-affected household to participate were poorly achieved and not equitable due to different household sizes. As a research team, we had limited experience of cash transfer interventions or working with new urban study communities ;Achieving a balance between operational simplicity and complex TB-af…	Psychological capability	2	Skills	1	Training	Guidelines, Service provision
Wingfield 2015	Middle	Other	[Incentive approach restrictions based on resource limitations] The optimal cash transfer size is likely to depend on the intervention setting and proposed outcomes of the intervention. It is noteworthy that the strategy we adopted in this research was a “costs-mitigation” rather than a “poverty-reduction” strategy and involved a cash transfer amount that were appropriate and feasible for the loc…	Physical opportunity	3	Environmental context and resources	5	Environmental restructuring	Guidelines, Environmental/social planning, Service provision	“We don’t fully understand the demographic differences and challenges between the urban and peri-urban communities” [CRESIPT Project Investigator] “Conditions are appropriate but you need to provide additional support to those people who find it harder to meet those conditions” [Ex-TB Patient Civil Society Representative]
Wingfield 2015	Middle	Other	[Stigma and Social deterrence] IInitially, first utilised bank had limited geographical accessibility, inconsisents "in branch" information and hidden fees, stigimitazing bank staff to patienst (not due to giagnosis it was anonmyous) [ Incentive strucutre do not tailor to complex population needs leading to participation declien: Distrust of authorities and social stigma] “High risk” patients in …	Social opportunity	4	Social influences	6	Restriction, Environmental restructuring, Enablement	Guidelines, Regulation, Environmental/social planning, Service provision	“Some patients would never open a bank account because they don’t want to register their name” [CRESIPT Project Nurse]
Wingfield 2015	Middle	Other	[ Hidden Bank Charges and delays Eroding Trust and stigmatizing patients ] [Philospficall conflicts to incentive given to those who use drugs]	Reflective motivation	5	Beliefs about consequences	7	Education, Persuasion	Communication/marketing, Guidelines, Regulation	“Some patients lost faith in the project due to the hidden bank charges” “[A negative aspect of the CRESIPT project intervention is] giving an economic incentive to a patient with drug-dependency and for that matter any other benefit/incentive such as food baskets (which some of these patients sell to buy drugs)”
Wingfield 2015	Middle	Other	[Delay in incentives as a barrier to achieveing project goals] During focus group discussions, the delay between incentivized behaviour and cash transfers was noted as a barrier to achieving project conditions due to the lack of a tangible “reward” and accompanying positive reinforcement loop. For example, when a household attended a participatory community meeting, it could be 1 to 2 weeks befor…	Automatic motivation	6	Reinforcement	14	Environmental restructuring, Coercion	Guidelines, Regulation, Service provision	“Due to the initial cash transfer delays, some patients didn’t get the money when they most needed it” [CRESIPT Project Nurse]. “Patients want immediate and tangible gratification on the same day as they complete their condition” [Ex-TB Patient Civil Society Representative]
Patel 2019	Middle	Other	[limited awareness of the scheme] Lack of awareness;About the DBT scheme benefits –– About documents required for enrolment .	Psychological capability	2	Knowledge	2	Education	Communication/marketing	"I do not know. Because I have not checked my bank account statement. [Patient verified his bank passbook and confirmed the credit of DBT on request by PI]."
Patel 2019	Middle	Other	[Technical challenges] initial months after launch of DBT scheme, the main challenge was nikshay software itself, which had many issues such as frequent changes to the software format, slow processing and data mismatch. There were issues in the PFMS portal also. Initially, there were some errors in linkage between nikshay and PFMS necessitating manual preparation of beneficiary list from PFMS. Th…	Physical opportunity	3	Environmental context and resources	5	Environmental restructuring, Enablement	Environmental/social planning, Service provision	"The bank account details of the patient that we were entering were not reflecting in nikshay software. Due to that, there was almost nil DBT payment in the initial months." "… we have to sit for preparation of manual list. The day when we sit can be any day when we are comparatively free from other work. Therefore, there is a chance of delay in payment." ""Though they [private doctors] have to n…
Patel 2019	Middle	Other	[Reluctance to facilitate enrollment- not a priority] Further, due to their busy work schedule and/or lack of motivation, some doctors were not inclined to facilitate the enrolment process for the patient . This led to incomplete or no details being collected from the patient to enable their enrolment into the scheme.	Reflective motivation	5	Goals	11	Persuasion, Incentivisation, Enablement	Communication/marketing, Regulation, Service provision, Fiscal measures
Patel 2019	Middle	Other	[Unwillingness to share private information- Stigma and mistrust] Providers felt that patients’ unwillingness to share their details including bank account and aadhaar (unique 12-digit iID) was a major challenge in the private sector. A.. B) Due to the stigma associated with TB, patients also feared breach of confidentiality.	Reflective motivation	5	Beliefs about consequences	7	Persuasion	Communication/marketing, Guidelines, Regulation, Service provision	…in private sector, some patients are financially well, so they do not require cash incentive and because of that, they are not giving details." "…In private sector, the patients are high profile, so they have stigma related to TB and because of that, they are not giving their information to us."
Patel 2019	Middle	Other	[Unwillingness to share private information- Higher-SES patients disinterested] Providers felt that patients’ unwillingness to share their details including bank account and aadhaar (unique 12-digit iID) was a major challenge in the private sector. A) Patients from higher socioeconomic strata were not interested in availing the benefit.	Reflective motivation	5	Role and identity	9	Education, Persuasion	Communication/marketing, Guideiines
Patel 2019	Middle	Other	[Inadequate amount] One patient felt that this is an inadequate amount.	Automatic motivation	6	Reinforcement	14	Environmental restructuring, Incentivisation	Guidelines, Fiscal measures	"…500 rupees [INR] per month is not enough; it should be increased to 800–1000 rupees [INR] per month."
Nirgude 2019	Middle	Other	[Eligibility criteria - bank acessess challenges] Not having a bank account was a key challenge noted, especially among the migrant labourers in the district. But, such efforts were often unsuccessful because patients lacked essential documents (like proof of address) to open an account. Some banks insistedon depositing a minimum amount at the time of opening the account, which was often not poss…	Physical opportunity	3	Environmental context and resources	5	Environmental restructuring, Enablement,Restriction	Guidelines, Regulation, Environmental/social planning, Service provision	So overall the people admitted in TB sanatorium who are destitute are not getting the benefit … I am helpless. (Health care provider) We were not sure in the beginning of the DBT program “whether Aadhaar is mandatory or not? Who will get the money? Who will do the job of Maker in absence of data entry operator?” (Health care provider) The process is too lengthy … the file movement, which starts f…
Nirgude 2019	Middle	Other	[Breach of confidentiality concerns] Some patients had confidentiality concerns about sharing their bank details as they feared this would reveal their TB status to people outside the health sector.	Reflective motivation	5	Beliefs about consequences	7	Education, Persuasion	Regulatio, Communication/marketing, Service Provision
Nirgude 2019	Middle	Other	[Target population donot value the incentive] Some patients who were financially sound and most often, receiving treatment from the private sector refused to receive DBT.	Reflective motivation	5	Role and identity	9	Persuasion, Modelling	Communication/Marketing, Service provision	I don’t want any benefit from Government. I earn 50,000 per month and I work in XXXX. I don’t need this 500 rupees. Government simply tells that they will give money but it will never be given to patients.
Nirgude 2019	Middle	Other	[Inadequate amount] Many patients felt that the money given under DBT was not sufficient to meet their needs. This feeling was echoed by the providers too, who felt that the money should be doubled.	Automatic motivation	6	Reinforcement	14	Incentivisation, Environmental restructuring	Fiscal measures, Service provision	Even for three days around 200 rupees required then how 500 rupees will be sufficient for one month? (Patient)
Nirgude 2019	Middle	Other	[Limited awarness of programme] While most patients interviewed were aware of DBT, one was unaware despite being on treatment for six months. [Teething challenges: unclear about guideliness] This included a lack of clarity about operational guidelines of implementation including roles and responsibilities. Trainings came late and affected thesmooth take-off of the DBT programme.	Psychological capability	2	Knowledge	2	Education	Guidelines, Communication/marketing, Service provision	I am on treatment since 6 months and I have not submitted any bank details or Aadhaar card details to anyone and unaware of DBT scheme. (Patient)
Musiimenta 2024	Middle	Other	[Money transfer issues challenges] Participants not recieveing transfers as intended and refunds had to be issues. 4 (10%) of the 40 participants received cash (once during the study period) as refund for the transport fare instead of being sent the mobile money incentive for transport to the clinic. These participants did not inform the study staff on time about their next clinic visit date, whi…	Psychological capability	2	Memory, attention and decision processes	3	Environmental restructring
Verma 2024	Middle	Other	[Lack of awarness of programme] The patients heard regarding the scheme for the first time from the healthcare staff.	Psychological capability	2	Knowledge	2	Education	Guidelines, Communication/marketing	“In government hospitals from where we get tablets, they informed us.”
Verma 2024	Middle	Other	[Physical impairment of TB patients challenges as a barrier to incentive reciept] Weakness was the main ailment suffered by the interviewees that stopped them form carrying out any regular day to day activity, their job etc.	Physical capability	1	Skills	1	Enablement, Environmental restructuring	Environmental/social planning	“Because of the illness couldn’t visit the bank. Legs pain a lot hence couldn’t walk or move around much.” “During the TB illness the person becomes so weak that they cannot do their job. In such situations the problem is that people don’t support as well.”
Verma 2024	Middle	Other	[Complexity/ lengthy of DBT procedure and delays] Respondents faced delay in receiving the amount due to errors in software, non-availability of documents to open accounts. [Work burden and Coordination of patients flow and inter-facility gaps] There was work burden (paperwork and multiple levels of approval). Patients that are being transferred out are not easily being accepted by the staff henc…	Physical opportunity	3	Environmental context and resources	5	Environmental restructuring, Enablement	Guidelines, Environmental/social planning, Service provision	“After my approval it goes to the accountant and then PFMS processing, following which a print is sent to me for cross checking for any problem. My signature, followed by signature of accountant, City TB Officers (CTO) and Medical Officer of Health (MOH) it goes back to bank. This lengthy is the process.” “I receive a batch of 100 patients from Nikshay software and if even one patient faces a pro…
Verma 2024	Middle	Other	[Stigma of being a TB patient]	Social opportunity	4	Social influences	6	Environmental restructuring Modelling	Communication/marketing, Enviornmental/social planning	“Some prefer to stay away from such patients.”
Verma 2024	Middle	Other	[Financally stable patients donot value the incentive and confidentiality breech concerns] The majority of patients receiving care in the private sector are financially stable, thus they do not see the value in DBT. Additionally, they worry about being scammed as a result of sharing confidential financial information. [Distrust in the initative] One of the interviewees did not believe the fact th…	Reflective motivation	5	Beliefs about consequences	7	Education, Persuasion, Modelling	Communication/marketing, Guidelines, Regulation, Service provision	“Those coming from rich family do not feel the need of this incentive, hence they do not provide their details.” “Some patients think that these people are taking our account details maybe they can fiddle with the account. Some have a dilemma as to why are we taking their bank details.” “Patient trouble us by saying why have we not received the amount yet, what are we doing with their account det…
Mohan 2024	Middle	Other	[Technical support gaps and skill deficits] Obtaining technical support to address such glitches was reported to be difficult. The program staff struggled to navigate the digital platforms, caused partly by their inadequate technical skills, highlighting the need for better training modalities to support them in operating these platforms. [Ilitracy and lack of tailored banking messaging] In addit…	Psychological capability	2	Skills	1	Training	Guidelines, Service provision
Mohan 2024	Middle	Other	[ Lack of knowledge and subsequent hesitancy of clients] PwTB from the private sector facilities hesitate or are unwilling to share their details with the health workers leading to a delay in enrolment and subsequent processes. Many PwTB did not have the required information about NPY and its processes, which prevented them from enrolling in the scheme and sharing their bank details. The district…	Psychological capability	2	Knowledge	2	Education	Guidelines, Communication/marketing	"Problems from the patient’s side are usually related to their unawareness of the scheme. They are not properly informed that the money is being provided for nutritional purposes. They don’t have proper bank accounts; they are hesitant to share the details, and they don’t bring the documents on time, which results in delay in validation of the account."- District- level NTEP staff "I purchased fi…
Mohan 2024	Middle	Other	[Banking issues] PwTB who do not possess individual bank accounts cannot receive NPY benefits. The same account cannot be used again if a patient suffers more than one TB episode. Thus, many beneficiaries are required to open new bank accounts to be enrolled in NPY. There were also instances where the PFMS does not accept the accounts of local banks like the Grameen (Village) or the Cooperative B…	Physical opportunity	3	Environmental context and resources	5	Environmental restructuring, Enablement	Guidelines,Regulation, Environmental/social planning, Service provision	"I feel bank account opening is the major problem. Patients do not have bank accounts most of the time and they need to spend a lot of time, money and effort to open the accounts. We are helping them start bank accounts, but some of them don’t even have ration cards and forget Aadhar cards. So, then we have to start there."- Field level NTEP staff "Travel is an issue here. As you saw, the roads a…
Mohan 2024	Middle	Other	[Cultural alienation from banking concenpts: intervention incongurrent with reality] In several ethnic groups, the concept of "banking" itself is alien, which makes it difficult for health workers to convince them regarding the importance of opening bank accounts for NPY.	Social opportunity	4	Social influences	6	Environmental restructuring Enablement	Environmnetal/social planning, Service provision
Mohan 2024	Middle	Other	[Lack of mainstreaming and Role isolation] The field workers observed that the health system currently conceived TB-related work as almost an exclusive responsibility of the NTEP staff despite efforts to mainstream the program work with public health work at primary health care level.	Reflective motivation	5	Role and identity	9	Education, Persuasion, Modelling	Guidelines, Regulation, Service provision	"See madam, NPY is a separate scheme but there is no separate HR for it. It is done by the same program staff who have to do case finding, investigations, treatment, monitoring adherence and documentation. So, we cannot put pressure on them beyond a level." "But if you see, these are the most deserving people who need this money, but somehow, we are not able to give them the entire money."- Field…
Mohan 2024	Middle	Other	[Percieived fixed benefit amount fail differential reinforcement] The stakeholders also highlighted that while the current benefit amount was helpful for few beneficiaries, it was barely adequate for several others. Thus, the utility of the benefit also depended on the socio-economic circumstances of the beneficiaries and households.	Automatic motivation	6	Reinforcement	14	Environmental restructuring, Incentivisation	Guidelines, Fiscal measures, Environmental/social planning	"I feel that this money may not be the uniform requirement of everyone. Sometimes, there are very poor patients for whom 500 rupees is insufficient. They may need more. You may also have a person coming from a very high-profile setting; for whom this money is not of much use because they can afford nutrition on their own. So, it is a diverse mix."- District-level NTEP staff
Mohan 2024	Middle	Other	Social exclusion and scheme blind spot to people most in need] Vulnerable populations like people experiencing home lessness or migrants may not have documents that prove their identity proof to initiate bank accounts. Thus, the neediest people, such as the homeless, destitute and the cognitively challenged, were not included in the scheme due to difficulties in opening bank accounts.	Reflective motivation	5	Beliefs about capabilities	8	Enablement	Guidelines, Regulation, Environmental/social planning, Service provision	“The people that we are working on are not suitable for the scheme because they don’t have any formal documents proving their identity. The scheme may be useful for many people, but not for the people that we are working with… I don’t think it is of much help. We would like the governments to place more attention to the PwTB who are on the sidelines and who are too marginalized to fulfil the nece…
Chadhar 2025	Middle	Other	[ Eligibility challenges due to: Non-availability/dormancy of bank accounts, and delays due to banking or administrative procedures] Several barriers were identified during the study. These included the non-availability of bank accounts, difficulties in providing accurate bank details, and dormant accounts due to inactivity. Another significant barrier arose from the recent merging of banks, whic…	Physical opportunity	3	Environmental context and resources	5	Environmental restructuring, Enablement	Guidelines, Regulation, , Environmental/social planning, Service provision	“When the banks were merged, it took time for people to receive their money. Many patients provide wrong account numbers or dormant account numbers, then they do not receive their money, and many don't check their bank statements at all.” -Senior treatment supervisor, Tuberculosis unit. "The lab technician created a Nikshay ID, then the doctor initiated the treatment and created another Nikshay I…
Chadhar 2025	Middle	Other	[Amount percieved as inadeuate relative to costs incurred as a TB patient] The majority of patients emphasized that the amount received is insufficient to purchase nutritious food items.	Automatic motivation	6	Reinforcement	14	Environmental restructuring, Incentivisation	Guidelines, Fiscal measures, Environmental/social planning	“What can you get in ₹500? With that amount, you can barely buy 2 trays of 60 eggs.” “Few patients expressed that instead of giving money, they should be provided with food items directly.” “₹500, nothing substantial can be accomplished. The government should at least be given ₹1000 or ₹1500.” “The ₹500 that are coming are of no use, it's better to receive a packet of items instead.”
Kim 2012	High	Smoking	[Outreach activities challenges] raising awarness of all employees about the intervention was a challenge. Specifically, LHCs thought it was difficult to reach hourly employees and that competing health programs (eg, Weight WatchersTM) might have hindered participation [ Working evironment incourrguent with programme] time constraints, and stress. Working in stressful, constantly changing, and in…	Physical opportunity	3	Environmental context and resources	5	Environmental restructuring, Enablement	Environmental/social planning, Service provision
Kim 2012	High	Smoking	[Organizational culture misalignment with programme goal] Employees and LHCs described aspects of their organizational culture that may have influenced intervention impact.	Reflective motivation	5	Role and identity	9	Education, Modelling	Communication/marketing, Regulation, Service provision
Kim 2012	High	Smoking	[Hesitancy about intervention efficacy] Doubts that financial incentives alone could help smokers successfully quit and noted that smokers should be internally motivated with quitting as the primary reward.	Reflective motivation	5	Beliefs about consequences	7	Education, Persuasion	Communication/marketing
Kim 2012	High	Smoking	[Limited motivation] lack of motivation; To them, smoking was essential to helping them manage their stress at work.	Automatic motivation	6	Emotion	13	Persuasion, Enablement	Communication/marketing, Service provision, Environmental/Social planning
Allan 2012	High	Smoking	[Stigma by associateion and delievery settings] The delivery timing of Quit4u also risked damaging self-identity through another means. In some pharmacies , incentive delivery was coincided with the distribution of methadone. Some feared being recognized in a queue associated with drug addicts, particularly in ethnic communities.	Social opportunity	4	Social influences	6	Environmental restructuring, Enablement, Modelling	Communication/marketing, Enviornmental/social planning	“I mean, well, standing in the queue was bad for a start but then the people that are standing along in the queue are not normal. They, the junkies, are totally out of this world I think and emm, some of them just start speaking to you and like you don’t even know them. That was one of the things that put me off.”
Allan 2012	High	Smoking	[ inconvenient Programme structure does not fit all] Participants raised concerns over structural aspects of the programme and inconvenience related to location, timing and time taken to be monitored. . Such issues appeared to be of greater concern and inconvenience for those with a disability or with childcare responsibilities. N.B: Locality of monitoring, individual/peer meetings, paperwork and…	Physical opportunity	3	Environmental context and resources	5	Environmental restructuring	Environmental/social planning	“with it being away in ***street, there is that many things happening there as well, it’s always in the back of your mind. Not that anyone would think of attacking me but you just never ken”. “First, it was a bad time at 4 o’clock because they work and I look after the grandchildren, you know, after school which was a bad time and then with me being deaf." “You are standing in the shop and people…
Allan 2012	High	Smoking	[ Increased feeling of guilt and FI ] Participants reported a number of reasons for disengagement: The enhanced feeling of guilt, made worse with knowledge of the financial gain and subsequent relapse, led to non-attendance at weekly monitoring sessions. .. For some, this relationship manifested itself in a sense of obligation to the service providers, manifest most clearly when they had “failed …	Automatic motivation	6	Emotion	13	Persuasion, Enablement	Communication/marketing, Guidelines, Service provision, Environmental/Social planning	”: “. . ..I just felt I had let them down as well. Even though it is yourself, you still feel as if you are letting other people down as well which again is a horrible feeling so then you feel guilt again and I think, I’m just gonna have a fag.”
Allan 2012	High	Smoking	[Concerns of poor use of service and Stigma] There was concern of reprimand for poor use of the service, embarrassment of confessing their failure and the perceived stigma [Effort not proportional to incentive ] The value of the incenitve is not worth the palaver to get it. Differenct views on its "role as a motivaton. FI weren't easily accessibile. Administration was frequently cited as an issue…	Reflective motivation	5	Beliefs about consequences	7	Persuasion	Communication/marketing, Guidelines, Regulation, Service provision	“I mean the £12.50 is great but the palaver to get it, is it worth it? But I guess that’s probably because I’m working. People that aren’t working probably have the time to do all that but I mean it could have been done, I just haven’t got around to it yet.” “It was like, if I was having a good week, yes, £12.50 is coming my way but when you are having a bad week and things are up in the air, I c…
Allan 2012	High	Smoking	[Contractual relationship- Felt change in relationship] Resons for disengagement hinted at a felt change in clients’ relationship with service providers, with the incentive introducing a quasi-contractual relationship. This placed the patient in the role of “providing the service” (smoking cessation) and the health care professional as the “buyer”. For some, this relationship manifested itself in…	Reflective motivation	5	Role and identity	9	Education, Modelling	Communication/marketing, Guidelines, Regulation, Service provision	This was cited as a reason preventing some from advancing in programme: “She [the pharmacist] was very patronising. . .. . .for somebody to sit there and patronise you, it was just not helpful. I cannae quote her but it was like, “right, we’re trying to help you, you are just throwing it back in our face.”
McKell 2013	High	Smoking	[restricted awarness of all key providers of the programme] Not all relevant professionals were fully aware of the study taking place. Community pharmacists in the study area had access to a network of pharmacy advisors who were interviewed as a group. i.e. pharmacy advisors did not recall having been told about the study. Advisors agreed that this information would have put them in a better posi…	Psychological capability	2	Knowledge	2	Education	Guidelines, Communication/marketing
McKell 2013	High	Smoking	[Digital literacy limitation and skills gaps ] some skills gaps also emerged in relation to advisors’ computer literacy and ease with data entry, and it could not be assumed that those with advisor skills had sufficient confidence in that area for the demands of the study. Whilst basic electronic data entry was part of their work, the initial study protocol for advisors to input data to the porta…	Psychological capability	2	Skills	1	Training	Guidelines, Service provision
McKell 2013	High	Smoking	[ High workload on cessation advisors and limited capacity] for all provders. It was widely accepted by respondents in the NSPS that the study added significantly to workloads, especially in terms of time demands. It was acknowledged that advisors already had a heavy workload, aiming to bring in five 5 clients a week, which meant an case load of up to 40 clients. The extra demands were identified…	Physical opportunity	3	Environmental context and resources	5	Training, Environmental restructuring, Enablement	Guidelines, Environmental/social planning, Service provision
McKell 2013	High	Smoking	[Dual role of research nurse and smoking advisor: non sustainabile- Role overload, and conflict] The role of research nurse was built in to the study from the start. It was initially felt that the role should be combined with that of smoking advisor. RNs had to have training in cessation in pregnancy issues as well in the study requirements. This was relatively easier for the full time worker as …	Reflective motivation	5	Role and identity	9	Education, Enablement	Guidelines, Regulation, Service provision , Environmental/social planning
McKell 2013	High	Smoking	[Initial resistence - Making lives harder and low risk ] Respondents reported some resistance to referring to the NSPS in some areas around the time the study started, although this perhaps reflected misperceptions about the developing service as much as the study. Observed reluctance to refer by some midwives was variously ascribed to: concerns about making women’s lives more difficult by encour…	Reflective motivation	5	Beliefs about consequences	7	Education, Persuasion, Modelling	Communication/marketing, Regulation, Service provision
Hefler 2013	High	Smoking	[inappropriate recruitment methods for a special population] the challenge of recruitment methods not working well and that there is high loss to follow up.=From the survey, it was concluded that Ma¯ori and Pacific women are willing to take part, but they needed to be recruited via direct approaches rather than through health services. [misalignment of programme requirments and providers capacity…	Physical opportunity	3	Environmental context and resources	5	Environmental restructuring, Enablement	Environmental/social planning, Service provision
Hefler 2013	High	Smoking	[ Ethical concerns and potentially exploiting economic desperation.] Because the incentive was very important financially to some women termed ‘breadline survivors’, this group sometimes had arguments over results when they returned a positive result and were ineligible for payment. Apparently, there were no false negative results.. Given that smoking is itself a marker for socioeconomic disadvan…	Reflective motivation	5	Beliefs about consequences	7	Education, Persuasion	Communication/marketing, Regulation, Service provision
Passey 2018	High	Smoking	[Staffing shortage and turnover : no capacity for implmentation] Although the AMIHS teams valued the program, they also found it challenging to implement without additional team capacity. One site withdrew because unrelated staffing issues meant they could not implement the program, and another site struggled to implement it fully because there was no AHW for most of the study period The group pr…	Physical opportunity	3	Environmental context and resources	5	Environmental restructuring, Enablement	Environmental/social planning, Service provision
Passey 2018	High	Smoking	[ Testing for quit validation] The Smokerlyzer was not always used at the first visit as intended, because there were some concerns that it was a “serious piece of equipment”.	Automatic motivation	6	Emotion	13	Persuasion, Modelling	Communication/Marketing, Service provision
Smoking in Pregnancy Challenge Group 2019	High	Smoking	[ low recruitment rate due to lacking infrastructure processes in place] A scheme implemented by one council in England, to promote both breastfeeding and stopping smoking among young pregnant women struggled with recruitment. having just two women enrolled in the smoking element of the scheme. This highlights the need to have partners across the maternal health system who can promote the scheme …	Physical opportunity	3	Environmental context and resources	5	Environmental restructuring	Guidelines, Regulation Environmental/social planning
Apata 2019	High	Smoking	[Logistical issues to venues of intervention administation and groups out of control] Among the logistical challenges they faced, the lack of a CEASE central venue that could provide stability for the program was reported as a critical issue. Sometimes, due to unforeseen circumstances, groups were displaced from their regular meeting spaces in community venues. [One-sided partnership: Lack of str…	Physical opportunity	3	Environmental context and resources	5	Environmental restructuring	Guidelines, Regulation, Environmental/social planning,	“It’s a little strenuous on the organization because they are using the space for no money, so that kind of limits income and we could use income.” . “I think at the end of the program, I didn’t even know the number of people that were signing up in the program. I didn’t know how many people finished, how many dropped out. I heard that the program was a success, but I didn’t have any hard numbers…
Apata 2020	High	Smoking	[lack of confidence to administer the intervetnion] Peer Motivators also expressed their insecurity when groups sometimes got “out of control.”	Reflective motivation	5	Beliefs about capabilities	8	Education, Modelling, Enablement	Guidelines, Service provision, Communication/marketing
Joyce 2021	High	Smoking	[Technological/infrastructure barriers] Participants reported issues with their watch battery life and frequently stated that the watch was not holding a charge long enough for it to pick up cigarette use Participants were given instructions to charge the watch overnight to maximize their battery life. (pilot 1) Participants reported various reasons for not wearing the watch, including being unab…	Physical opportunity	3	Environmental context and resources	5	Environmental restructuring	Environmental/social planning
Too 2021	High	Smoking	[ CO Validation services site and data capture] Initially, capturing the CO for women at both the 4 and 12-week time points was through pharmacy services with support from the Public Health-Health Improvement Pharmacy team. This brought some data capture challenges and increased administration. By the time of the study period (January-June 2019), clients attended the pregnancy SSS to establish CO…	Physical opportunity	3	Environmental context and resources	5	Environmental restructuring, Enablement	Environmental/social planning, Service provision
Breunis 2023	High	Smoking	[Un expected exernal events: COVID-19 Disrubtion] The pandemmic has brought about challenges and changes to initial implementation protocool. During the first two waves of the COVID-19 pandemic (March to May 2020 and November 2020 to March 2021) home visits were not possible according to Erasmus MC policy and were temporarily replaced with a second phone call. During the two COVID-19 waves no bio…	Physical opportunity	3	Environmental context and resources	5	Environmental restructuring	Environmental/social planning
Breunis 2023	High	Smoking	[Group incentives and peer pressure] Group incentive was not motivational, increases (negative) group pressure	Social opportunity	4	Social influences	6	Environmental restructuring	Environmnetal/social planning
Breunis 2023	High	Smoking	[ Online mode of delivery as demotivating and impersonal] impersonal interactions via online platform and...was daunting and demotivating. The participants felt that online support via the platform was impersonal. [Guilt of winning] … and it feels like briber, and some participants felt guilty for receiving incentives while others did not receive them despite also doing their best to quit smoking	Automatic motivation	6	Emotion	13	Persuasion, Enablement	Communication/marketing, Service provision, Guidelines, Regulation, Environmental/social planning
Breunis 2023	High	Smoking	[Challenges to clients referrals and recruitment ] Talking about Smoking cessation communication to patients was challenging, Referral to the study and and midwives fear them leaving their clinic when discussing smoking cessation too often. [ Mixed feelings about incentive impact/effectivness] Both participants and healtchcare providers reported mixed feelings about the impact and motivational ef…	Reflective motivation	5	Beliefs about consequences	7	Education, Modelling	Communications/Marketing, Guidelines, Service provision
Yon 2024	High	Smoking	[Recruitment challenges due to providers lack of confidence] Another unexpected barrier to recruitment/enrollment was service staff’s lack of confidence initiating meaningful conversations with women around tobacco use. Staff found that conversations with women were often less about tobacco use and more about providing social/ emotional supports around navigating difficult home and family situati…	Psychological capability	2	Skills	1	Training	Service provision
Yon 2024	High	Smoking	[Programme structure and target population needs] Frequency of visits required by the intervention was a barrier to the women due to time and transportation constraints. [Staff Hiring challenges] To tailor to women need, home visits were offered but delays in staff hiring were an obstacle. [Limited interactions due to unexpected external events] COVID-19 pandemic restrictions: offices closed and/…	Physical opportunity	3	Environmental context and resources	5	Training, Environmental restructuring, Enablement	Guidelines, Environmental/social planning, Service provision
Tranby 2025		Smoking	[ Smoking cessation self-report questions: unclear wording leading to disengagement] Additionally, PWS received a text message at each check-in with a link to answer the three self-reported questions. However, the initial wording was confusing (“You’ve been selected for a short survey!”) and led early participants to delete the link. The wording was changed later, and the questions were also avai…	Psychological capability	2	Knowledge	2	Education	Communication/marketing
Tranby 2025	High	Smoking	[Technical challenges using the app] Participants reported disconnecting from the intervent before test photos had finished uploading. One participant lost a test kit before the 6-month check-in, was mailed a replacement, and had the completion window extended by three days to allow for shipping. Technical difficulties with the Vincere Health portal and app included: study staff login challenges,…	Physical opportunity	3	Environmental context and resources	5	Training, Environmental restructuring	Guidelines, Environmental/social planning, Service provision
Green 2017	High	Other	[Admin burden: FI strurcture incongurrent with clinical care] The main challenges to acceptability for investigators and staff were related to implementation issues; the primary one being the requirement for quarterly viral load tests to qualify for financial incentives in the study and consequent burden and overload. such requirement did not always align with clinical care at some sites, particu…	Physical opportunity	3	Environmental context and resources	5	Environmental restructuring, Enablement	Environmental/social planning, Service provision	“We experienced significantly higher patient volume because patients were showing up for their visits and also were wanting to be rescheduled every three months, whereas otherwise they might have begged and pleaded for four month visits or six month visits or even not have scheduled right away when they left the clinic at a previous appointment. So it was a challenge for us to deal with a steadie…
Green 2017	High	Other	[Role conflict due to gift card logistivs vs clinical judgement ] Disturbance of work flow to align with the intervention and built up resentment. Some staff and investigators reported that they, or the providers they worked with, felt obligated to schedule visits or lab work around the requirements for gift card eligibility rather than clinic availability, space, or patient needs, and some resen…	Reflective motivation	5	Role and identity	9	Education, Persuasion, Modelling	Communication/marketing, Guidelines, Regulation, Service provision	“The study calls for its own needs in terms of CD4 and viral load draws. And meanwhile clinical care has sometimes different demands. . . .meaning that providers might not always see the need to send the CD4 and viral load on a given date. But the patient feels that if they don’t have CD4 and viral load done on those dates, they don’t get their incentives card. So there’s some times it led to con…
Shelus 2018	High	Other	[ limited staff experience in explaining FI processes and appropriate timing clinical setting( HIV) and language/cultural misunderstandings ] Staff members reported that explaining the intervention to patients who had just learned of their HIV infection could be very challenging. Some staff suggested that difficulties were exacerbated when study staff who were not especially trained or experience…	Psychological capability	2	Skills	1	Training	Service provision	Having to tell somebody they’re positive really is hard enough without dealing with ‘Can you sign here for this coupon and can you be part of this study?’. And the patient is like ‘I just found out that I’m positive.' [Staff member] Just telling the patient. . .about the program was kind of difficult. Especially for the other coordinator. . .he didn’t have the background that I have. So it was ki…
Shelus 2018	High	Other	[Cognitive demand needed for incentive claim] Additionally, patients had to retain their coupon after receiving it and present the coupon at the care clinic at both the first and second visit in order to receive the gift cards. Some staff reported problems with patients losing coupons.	Psychological capability	2	Memory, attention and decision processes	3	Environmental restructring		I’ve had people really plead with me between visit 1 and visit 2. You’re supposed to give themthe coupon, they’re supposed to bring it back. Now that’s tough for some people. That is very, very tough. [Staff member
Shelus 2018	High	Other	[ Misalignment of Coupouns disbursment with clinic workflow and patient needs challenges] : While HIV test sites were allowed some flexibility to integrate the intervention into their current standard of care, the study required test sites to provide the coupon on the same day as providing the HIV-positive test result to maximize the potential to link to care. However, some staff and site investi…	Physical opportunity	3	Environmental context and resources	5	Environmental restructuring, Enablement	Environmental/social planning, Service provision	Some patients would be discharged without having gotten the coupon and then we would have to track them down to try to get them the coupon. . . Patients could be discharged on a Saturday or Sunday and just not have the coupon yet. Or we may not have given it to them yet for one reason or another. [Investigator] They had to coordinate. . .we have a lot of tester counselors, but only some of them w…
Shelus 2018	High	Other	[Negative Patient Reactions to Incentive Offers]Some site investigators and staff indicated that a small number of patients reacted negatively when the intervention was first described to them.	Automatic motivation	6	Emotion	13	Persuasion, Enablement	Communication/marketing, Service provision	"The patient is like in tears, crying, and the worst thing we did is that we started explaining to her [the coupon program]. . .She didn’t want to hear it, she got mad. She started cryingmore.She said that we were offending her. That number one, why were we assuming that she’s not going to come back to her appointment? So we think that she doesn’t care about her health? Is it something about the …
Shelus 2018	High	Other	[Contractural relationship and transctional expectations- change in provider-client relationship due to incentives] : intervention created expectations among patients about being paid to obtain health care, and a sense of entitlement. Several site investigators discussed initial concern that patients might demand gift cards and develop expectations, but did not see this materialize.	Automatic motivation	6	Reinforcement	14	Environmental restructuring, Coercion	Guidelines, Regulation, Environmental/social planning	" I think they—once they received the $125, they expected money to come. . .for any other services. “Oh you want me to stay? You’re gonna have to pay me to stay.” "There were so few incidents of patients really misbehaving during this. . .and I would have thought that would have been a huge problem. That whenever money was involved that people would be demanding things and asking for things and t…
Shelus 2018	High	Other	[Negative opinioins about percieved un-necessary intervention] Site investigators and some staff who expressed negative opinions felt that their clinics already had strong L2C interventions and that an FI could not have an impact or was not necessary. [ Mixed opinioins on FI amount, public health rationale and challenges to intervention sustainability]: Staff and site investigators were uncertain…	Reflective motivation	5	Beliefs about consequences	7	Education, Persuasion, Modelling	Communication/marketing, Guidelines, Regulation, Service provision	I’m not sure it truly led to any significant increase in linkage beyond what we did. . .Part of that is we have such an active linkage to care methodology in place to start.Where you know,when folks are tested, they’re escorted over personally in to the clinic and into care immediately. [Investigator] I would say less would be better because A, we could be funded for longer and B, I feel like it’…
Warnock 2025	High	Other	[Pre-existing structural/systemic challenges to users engagement in PrEP care] Site leaders, PrEP navigators, and research coordinators identified several challenges to engage PWID in PrEP care, primarily due to competing service priorities such as housing and emotional needs. Housing instability was a particularly significant barrier. Site leaders emphasized the impact of housing insecurity on P…	Physical opportunity	3	Environmental context and resources	5	Environmental restructuring, Enablement	Environmental/social planning, Service provision	One research coordinator highlighted the difficulties faced by unhoused PWID during the fentanyl era of the U.S. overdose crisis: “For a lot of folks, it’s [PrEP] not their priority. And frankly, should it be if they’re unhoused and dealing with fentanyl and all of these things are happening.” Another research coordinator described the challenge of addressing PrEP with PWID frequently experiencin…
Warnock 2025	High	Other	[Burnout in light of intervention and already demanding role] Another site leader discussed the inherent challenges faced by community-based counselors or case workers due to their role. In the context of the challenges PrEP navigators face in their professional roles, site leader expressed concern about burnout among their staf. PrEP navigators as well recognized that the nature of their jobs of…	Automatic motivation	6	Emotion	13	Incentivisation, Enablement	Fiscal measures, Guidelines, Service provision, Environental/social planning	PrEP navigator 1: “That’s why all my participants, they know I’m stretched all over, but they have me listed as their emergency contact. So, when they move around, I update everything. I’m calling everybody. I’m sending emails… All my participants use my work, my office as their address. They don’t miss their mail. They don’t miss their appointments. I make sure I stay on it because it could be t…
Warnock 2025	High	Other	Establishing a new health behavior (PrEP use) use requires more time ( fi.e. frequcne and duration of intervention) to support patients in their journey as providers identified limited percieved feasibility of rapid behavior change of their clients especially for individuals starting with low awareness.	Reflective motivation	5	Beliefs about capabilities	8	Enablement	Environmental/social planning, Service provision	“I think in order to establish like a health habit like PrEP, I feel more sessions are needed just getting in that routine over a long period of time.” “You’re taking people through the stage of change. They’re not even aware of PrEP. And so, asking them to move through all of the stages within 12 weeks to meeting the goal of being on PrEP. … I think asking for this much change in this population…
Wagner 2025	High	Other	[ Preexisting social and structural issues: app/intervention incongurrent with users reality] Several YWH reported that setting a consistent time in the app for reminders was difficult when they did not have a consistent daily routine. One provider also noted that the intervention did not address some of the underlying social and structural issues (mental health, stable housing, substance use) th…	Physical opportunity	3	Environmental context and resources	5	Environmental restructuring, Enablement	Environmental/social planning, Service provision	“The biggest barrier to adherence, at least what I am seeing, is patients with social issues. If you are struggling with housing… I think it is really difficult to take a daily pill. You may not even have your pills with you all the time, so I don’t know if this [aDOT app] will be helpful” (Provider, 28 years old, Asian, California). “The only concerns I did have were some privacy concerns. You k…
Powell-Jackson 2009	Low	Other	[ Difficulties in understanding incentive policydue to limited dissimentation] Many respondents were unclear about aspects of the policy. They reported that there had been inadequate dissemination of information to the districts. The confusion created variations in implementation and affected the ability of health workers to disseminate information in communities, potentially hampering the effect…	Psychological capability	2	Knowledge	2	Education	Guidelines, Communication/marketing, Regulation	"Most importantly, the staff should be properly oriented before launching the programme." "I am not sure about getting the incentive when referringthe women to another facility after I attended her first. And I am also not sure from which facility the women will get the incentive..." "We were all confused about how to distribute the incentive and we were not sure whom to give, [and] how much to g…
Powell-Jackson 2009	Low	Other	[Poor planning of budget and lack of monitoring systems] The amount budgeted did not match requirements, or the amount released was less than the amount stated in the budget.	Psychological capability	2	Behavioural regulation	4	Education, Enablement	Guidelines, Regulation, Service provision	"We started working with a tentative plan but as the number of deliveries increased, women who delivered in the beginning got the incentive and others were left out. About 40 to 50 women did not get the incentive. Those who did not get [the money] started fighting with us."
Powell-Jackson 2009	Low	Other	[Deviations from the scheme policies and variations in the interpretation of the eligibility criteria and the administration of the cash] There were numerous practices in the implementation of the conditional cash transfer to the women. There were variations in the interpretation of the eligibility criteria and the administration of the cash. The former included cases where health facilities simp…	Physical opportunity	3	Environmental context and resources	5	Training, Restriction, Environmental restructuring	Guidelines, Regulation, Environmental/social planning, Service provision	"As the incentive is given for transportation expenses it should be given on time." "In my opinion, the incentive should be given to the woman immediately after she delivers...if she does not get the money in her hand she may not be able to borrow and then she will face problems." "We sometimes feel that this scheme should be stopped. Either the money should arrive on time otherwise itt does not …
Powell-Jackson 2009	Low	Other	[gender power dynamics influencing implementation] The practice of giving cash to husbands was a particular concern to some respondents who were worried that the money might be misspent.	Social opportunity	4	Social influences	6	Restriction, Environmental restructuring, Enablement	Guidelines, Regulation, Environmental/social planning, Service provision
Powell-Jackson 2009	Low	Other	[Misalignemtn of icnentive amount with population needs] A diverse group of respondents also reported that funds had been inadequate to pay beneficiaries,.	Automatic motivation	6	Reinforcement	14	Environmental restructuring, Incentivisation	Guidelines, Fiscal measures
Powell-Jackson 2009	Low	Other	[Top-down drcusuin making excluding local input] There was frustration that the central level did not consult with the district level in the development of plans, even when the district had taken the initiative to plan how to spend the budget.	Reflective motivation	5	Role and identity	9	Education, Modelling, Enablement	Communication/marketing, Regulation, Service provision
Powell-Jackson 2009	Low	Other	[Percieved unfariness and moral conflict on restrictive eligibility criteria, and potential discrimination against those most in need] had specific concerns with the eligibility criteria, questioning the logic of only giving the cash to women with two or fewer children. Respondents felt that this indirect discrimination, partic ularly against poorer women, opposed the overall aim of the programme…	Reflective motivation	5	Beliefs about consequences	7	Education, Persuasion	Communication/marketing, Guidelines, Regulation, Service provision	"The poorest of the poor are excluded from the incentive because the poor are the ones who have more thantwo children. So there should not be any parity condition"(District health office, Hill, Key informant interview) "Women having more babies are subject to higher risks and they are deprived of the incentive." (District stakeholders, Plains, Focus group discussion) "If safe motherhood is women'…
Lama 2014	Low	Other	[Economic barriers to service use/ target behaviour and limitations of public maternal services ] Unemployment and financiall barriers resulting in limitations to achieve institutional delivery and seeking formal care . Hence, women from low economic status for not availing the services. Despite the incentive scheme, Health centers lack adequate facilities imaging, basic medicines so they are ref…	Physical opportunity	3	Environmental context and resources	5	Environmental restructuring, Enablement	Environmental/social planning, Service provision	“Even though the services provided in health centers are free, the cost of transportation and other expenses are high, so people cannot afford to bear the extra costs. Therefore I think most of the women from remote villages are deprived of services because of lack of money”. “Although hospitals provide some money for check up and delivery, it is not enough. People cannot afford to pay the person…
Lama 2014	Low	Other	[Social and cultural norms misalign with scheme target behaviour] Women are forced to deliver at home /cow shed. For example, naming cermemony which forbids her from going out postnatally for a period of time so cannot go for postnatal checks. There is also a common theme reported by participant groups of prevelant Illetracy and limited awarness, shyness and stigma of exposing their body parts to…	Social opportunity	4	Social influences	6	Restriction, Environmental restructuring, Enablement, modelling	Guidelines, Regulation, Environmental/social planning, Service provision. Communication/marketing	. "cost to reach there is high. I do not want to put burden to my family. So whatever they say I have to obey”.
Sidney 2016	Middle	Other	[ Procedural difficulites in incentive reciept and delays] Most described difficulties in obtaining the cash incentive. Participants reported several issues including procedural hurdles of opening a bank account to deposit the check and being instructed to come back to the health facility [ Context and accessibility]:These women were not able to participate due to circumstances outside of their c…	Physical opportunity	3	Environmental context and resources	5	Environmental restructuring, Enablement	Environmental/social planning, Service provision	I planned to deliver in the hospital…When the pain started it was raining heavily. When I told my parents about the pain, they called the [free emergency transport] vehicle but they were not able to get through because of the heavy rains…We were planning to go to the hospital but the baby came out very quickly.” – District 2 Non-JSY Participant (Home Delivery), Age 22 During the day I can go alon…
Sidney 2016	Middle	Other	[Powerlessness- Shift in relationships] The women knew that the hospital staff was not supposed to ask for money but they felt powerless to refuse to pay for fear of not receiving ‘proper’ care.	Social opportunity	4	Social influences	6	Restriction, Environmental restructuring, Enablement	Guidelines, Regulation, Environmental/social planning, Service provision
Sidney 2016	Middle	Other	[ Incentive amount inadequate to costs incurred due to "hidden" costs] Some women conveyed conflicting emotions when talking about the costs associated with a facility-based delivery and receiving the benefit. They questioned the appropriateness of having to pay for some of the delivery services, but felt the program provided cash to pay for these elements thus avoiding additional OOP expenditure…	Automatic motivation	6	Emotion	13	Persuasion, Incentivisation, Enablement	Communication/marketing, Regulation, Service provision, Evironmental/social planning	This non-JSY participant was irritated by the ASHA’s reprimanding for having an unintentional home birth. “I became angry because she [ASHA] was scolding me…[ASHA said] You should have informed me and now hospital officials will say that I did not bring you in time. Delivery cannot happen so fast…”– District 1 Home Delivery, Age 21
Sidney 2016	Middle	Other	[ negative perceptions towards quality of care at public facilities ] Around half of the women were content to deliver in the public sector if they felt healthy and thought the delivery would be ‘normal’. Otherwise they would prefer to seek care from a facility offering what they perceived to be a higher quality of care in the private sector. This ‘common sense’ norm was expressed among JSY parti…	Reflective motivation	5	Beliefs about consequences	7	Education, Persuasion	Communication/marketing, Guidelines, Service provision	When asked where this JSY participant would deliver if she became pregnant again, she succinctly said, “We will go to [public] hospital but if I feel very weak, I will go to the [private] facility.” – District 1 JSY Participant, Age 20
Gupta 2018	Middle	Other	[Unclear intervention aims] Lack of clarity on the aim of the programme despite messages in mission documents of whether the JSY was a programme to imporve quality and outcomes of MCG services or a cash incentive programme to shift childbirths to the facilities.such perceptions also seem to have isolated the JSY from the overall functional ambit of RCH and the broader program mission	Psychological capability	2	Knowledge	2	Education	Communication/marketing
Gupta 2018	Middle	Other	[Limited preparedness of facilities due to preexisting systematic and structural barriers] Comprimsed the facilities abilitites to provide expected services for birth and birth complications which led to low uptake of the programme. The limited availability of specialized doctors and competent nurses, resources and infrastructure, even more in rural areas, was perceived to be the foremost reason …	Physical opportunity	3	Environmental context and resources	5	Environmental restructuring, Enablement	Guidelines, Regulations, Environmental/social planning, Service provision	"“Doctors at government facilities can’t handle complications, and people are scared of death. Therefore they [patients] prefer to go to private hospitals for delivery.” (ASHA; Jharkhand)" “The conditions of our hospitals are not good. We need manpower, and infrastructure for better results.” (District official) “We tell people about of the benefits of going to hospitals for childbirth, but peopl…
Gupta 2018	Middle	Other	[Social and Cultural norms] Decisions to seek care were reportedly influenced by several factors embedded in the social and cultural mileu. Lack of awareness about the importance of medical care during childbirth combined with preconceived beliefs of elderly people in favor of home-based childbirth, were jointly associated with a reduced uptake of the JSY. In some cases, ASHAs were unable to effe…	Social opportunity	4	Social influences	6	Restriction, Environmental restructuring, Enablement, Modelling	Guidelines, Regulation, Environmental/social planning, Service provision. Communication/marketing	“People are not considering the benefit of the JSY, some of them decide about the place of childbirthaccording to their family.” (ASHA) “Sometimes the staff at the hospitals asks for money from the patients after delivery. This makes it difficult for us [ASHA] to convince the patients towards facility-based delivery.” (ASHA; Jharkhand)
Gupta 2018	Middle	Other	[ Limited providers incentivisation] insufficent cash incentive to provide to pay for service. The conditional cash incentive given to providers against the task was much lower than the expenditure they incurred while helping pregnant women to access facility-based care	Automatic motivation	6	Reinforcement	14	Incentivisation	Guidelines, Fiscal measures, Service provision	“Our allownce should be increased. It is hard to perform our duties with less money.” (ASHA)
Baba-Ari 2018	Middle	Other	[ Percieved Vs (unclear) true programme objectives] The perception of the initiative (including possible benefits) was a major determinant of response to the programme. Perceived programme objectives did not need to align with the true programme objectives to promote uptake. Most respondents did not fully comprehend the reasons behind CCT programme itself, eg, expected health gains and improving …	Psychological capability	2	Knowledge	2	Education	Communication/marketing, Service provision	“When I first heard about it I said it was good of the government to finally remember us in the villages because like me now, I don’t work…the programme is a good one if they can continue it because it will show they are interested in the poor people and want to help us...” “I heard they were giving money if you come to deliver here, so I came... I don’t know if I will come again (if the programm…
Baba-Ari 2018	Middle	Other	[Cultural practices incongurrent with intended behaviour change] Cultural practices (eg, home delivery by traditional birth attendants) influenced utilization of services, irrespective of incentives. One non-beneficiary regarded utilizing available health services as a last resort in the face of complications.	Social opportunity	4	Social influences	6	Environmental restructring, Enablement, Modelling	Environmental/social planning, Communication/marketing	“(proudly) All of us (female family members) give birth in our houses, even if I go for the ANC, I will still deliver at home because we don’t go to hospital to deliver…yes if there is problem I will go (to the PHC) but we don’t have problems...”
Baba-Ari 2018	Middle	Other	[Poor Adherance to FI protocol] Misalignment with wirtten policy; contrary to the written program policy of four tranches staggered over pregnancy period, post-delivery and post-natal visits, payment was done in two tranches of unpredictable amounts totalling N5000. [Access: transportation challenges] A major a reason for non-uptake of the CCT services among was the distance from their homes, oth…	Physical opportunity	3	Environmental context and resources	5	Restriction, Environmental restructuring, Enablement	Guidelines, Regulations, Environmental/social planning, Service provision	“The first time they called me to the facility (between ANC visits) and I was given N1300, the second time they gave me N3,700 (after delivery) ...” If it wasn’t far, I would have gone but who will stay with the children when I go…nobody and I will go early in the morning, who will give them food then? They should bring another one near us in... (this village) and I will go, at least the children…
Baba-Ari 2018	Middle	Other	[ FI insufficent motivation to change] Many respondents regarded the cash incentive as insufficient motivation with some indicating this as a deterring factor against continuing with the programme. Cash may not be a sufficient incentive for some non-beneficiaries.	Automatic motivation	6	Reinforcement	14	Environmental restructuring, Incentivisation	Guidelines, Fiscal measures	“…of course it is why I decided to come, I don’t work and my husband works very hard to feed us, anything extra will at least help me buy something for the house, but it’s not much you understand, they should give something more, you can’t really buy more than one or two things...”
Baba-Ari 2018	Middle	Other	[ Fear of mistreatment by providers as a barrier of engagment to incentive scheme] There were also concerns about the quality of care received at the facilities and fears of poor treatment by health workers.	Automatic motivation	6	Emotion	13	Persuasion, Modelling, Enablement	Communication/marketing, Regulation, Service provision, Evironmental/social planning	“If you get a wicked one (midwife) to deliver you, she will just be shouting at you for no reason, many women will tell you, and you can’t do anything because ...I will prefer to give birth at home at least I have my privacy and nobody will be shouting at me”
Baba-Ari 2018	Middle	Other	[No intention to join the shceme due to lack of trust in the government initatives] Negative perception of government was an important deterrent. One participant (non-beneficiary) had no reason for not registering for the CCT. She felt no need of going to the hospital as her previous children had all been born at home without complications.	Reflective motivation	5	Beliefs about consequences	7	Education, Persuasion, Modelling	Communication/marketing, Guidelines, Regulation, Service provision	“(laughing...) why should I believe them, someone will just come and tell you they will give you money just go to the hospital, even if it is true, you will suffer and go today,tomorrow they will say sorry, the money has finished, no money for you…” “Is it now after my five children that they will say comeand collect N5000, when my last born was sick and I was borrowing money no government gave m…
Contractor 2018	Middle	Other	[Poor understanding of the intervention and unawarness of services available] While there was a reliance on incentives and disincentives to increase coverage of services, there appeared to be a gap between the intended purpose of services and women’s understanding of it. During ANC check-ups, which were conducted at the VHND once a month, almost all women reported receiving iron folic acid (IFA) …	Psychological capability	2	Knowledge	2	Education	Guidelines, Communication/marketing	“How can we predict when the baby will be born? It will be born when it is time.” There was also a belief that complications and death, if they have to occur, will occur anyway and nothing can really be done to stop them apart from allaying the spirit (doomba).
Contractor 2018	Middle	Other	[Cultural misalignmnet :[Childbirth is a natural process and do not need a health facility] The tribal approach to childbirth as a normal event; this community pregnancy and childbirth is perceived as a natural process, not requiring much external intervention. The traditional birth attendant for instance mentioned that in case of prolonged labour, retained placenta or unrestrained bleeding, it i…	Social opportunity	4	Social influences	6	Environmental restructring, Enablement, Modelling	Environmental/social planning, Communication/marketing, service provision
Contractor 2018	Middle	Other	[Other competing prioritesand practice and the lack of Dai ] Despite the JSY and other initatives, women gave different reasons for delivering at home.Since the burden of both household work and livelihood was borne by women, they were concerned about the number of days that would be lost if they went to the hospital. Birthing at home meant that they could go back to work immediately and tend to …	Physical opportunity	3	Environmental context and resources	5	Environmental restructuring, Enablement	Regulation, Environmental/social planning, Service provision
Contractor 2018	Middle	Other	[Gamming of the system- "Fudgig data"] We noted that not all deliveries that were recorded as ‘institutional delivery’ were necessarily conducted in a public health facility. Several women who actually delivered at home were later taken to the health facility and recorded as institutional deliveries so that they could avail of the JSY incentive.F	Automatic motivation	6	Reinforcement	14	Environmental restructuring, Coercion	Guidelines, Regulation, Fiscal measures	" She was not interested in going to the hospital for delivery. They say, “We are Adivasi people, we don't want to go outside and other male member shouldn't touch us.” I told her, “We are all present for your benefit why shouldn't you listen to us? Both mother and baby will be safe in the health facility.” When she was not convinced I spoke to her husband, “If anything happens the family will su…
Contractor 2018	Middle	Other	[Preocupation with achieving targets and coercion] There was a preoccupation with ensuring “coverage” of services for every single pregnant woman, outreach workers also used coercive tactics to achieve this. In order to get women to come to the VHND, the ANMs and AWWs at the local level instituted their own conditionalities. [Exclusion of traditional service providers] Community members consult a…	Reflective motivation	5	Role and identity	9	Education, Persuasion, Modelling	Communication/marketing, Guidelines, Regulations, Service provision	“We threaten them that if they do not come, they will not get their take-home ration. We know this is not true, but they believe us. What can we do, we will be in trouble if they don’t come” (interview with ANM).
Contractor 2018	Middle	Other	[Lack of trust due to adverse experiences and accountability failures] A significant factor that affected women’s decision whether to choose institutional care was that of others’ or their own adverse experiences .[ A death incident] What is worse; it has causes; An instance was mentioned when doctors had attempted to a broker deal with the family of a deceased woman, in order to avoid blame. In …	Reflective motivation	5	Beliefs about consequences	7	Education, Persuasion, Modelling	Communication/marketing, Guidelines, Regulation, Legisation, Service provision	According to the ASHA, “they promised to get the family the JSY benefits and the doctor who was in charge offered to pay the family 20,000 rupees for raising the children. The family accepted his offer. However after a few months, the doctor disappeared, and was not heard from again.” The woman’s husband felt cheated. He said: Why should we go to hospitals when they do not care for us? If my wife…
Dickin 2022	Middle	Other	[Non adherence to FI protcol due to misinformation] Healthcare staff reported several reasons for not adhering to the intervention including: believing that the intervention had ended.	Psychological capability	2	Knowledge	2	Education	Communication/marketing
Dickin 2022	Middle	Other	[Technological/infrastructure failure and poor infrastructure : portal and card reader system ] challenges with portal capturing all visits and consequent substantial drop-off in automatic payment registeration. A low proportion of visits were captured as intended. In the Afya portal, 6440 of the 25 085 (26%) total registered payments were recorded automatically, indicating that the visit was rec…	Physical opportunity	3	Environmental context and resources	5	Environmental restructuring, Enablement	Environmental/social planning, Service provision	‘…payment of money is taking too long and these clients were told that this is money they would be receiving every month. You find that a client has come for all the ANC visits, all the immunisation services and now the baby is 7 months with no single cent.’ Nurs " it would tell them to be very ready for this programme, because it requires a lot from them.’ "
Dickin 2022	Middle	Other	[Fear of Reputational damage due to intervention failure] Nurses reported many challenges with implementation of the intervention,including inconsistent and variable success with automated payments. This impacted acceptability because nurses were viewed as the ‘face’ of the Afya CCT intervention to clients and were worried about damaging their community relationships. [Professional/Social boundar…	Social opportunity	4	Social influences	6	Restriction, Environmental restructuring, Enablement	Guidelines, Regulation, Environmental/social planning, Service provision.	‘They will tell you to give them something… that they are the ones who have made you get that money and that you should buy for them a soda or give them something small"
Dickin 2022	Middle	Other	[ Non-adherance to FI protocol by providers due to cease of incentivsation] The remaining 74% of payments required involvement of the field implementation partner to manuallyrecord a visit and trigger a transfer. For this to happen, a participant or nurse needed to place a phone call to the field implementation partner and report a visit. Compared with 27% of visits in 2018, only 3% of visits wer…	Automatic motivation	6	Reinforcement	14	Environmental restructuring, Coercion, Incentivisation	Guidelines, Regulation, Fiscal measures, Service provision	‘Someone at 3 weeks’ time, the PDT (pregnancy test) is positive; the client is here and wants to start ANC. You are not even sure of the pregnancy and the client is insisting.’
Dickin 2022	Middle	Other	[Providers avoiding card taps- Rationalsed dishonesty- to evade conflict] Providers not tapping the cards to avoid conflicts with participants over delayed transfers due to the faulty system, including sometimes telling participants the trial had ended; new staff at facilities who did not want to participate due to challenges with delayed transfers. No training for new staff; and the card reader …	Reflective motivation	5	Beliefs about consequences	7	Persuasion, Modelling	Communication/marketing, Guidelines, Regulation, Service provision	‘I will understand that the system failed but what about the client? The client is seeing it as if it is me who has eaten that money, which is not the case.’ ‘But now they are not getting the funds, yes…They are saying ‘now this thing…’ some of them even have the card but they do not want to produce the card, because it does not make any difference.’ They should take it that it’s their role to at…
Banerjee 2025	Middle	Other	[Staffing gap and workload: Percieved neef for dedicated PMMVY officials at the block level] Although human resources for implementation of the scheme was felt to be sufficient by the respondents, there was a perceived need for dedicated PMMVY officials at the block level. In addition, the programme implementers indicated that there was a high workload in terms of data entry related to the scheme…	Physical opportunity	3	Environmental context and resources	5	Environmental restructuring, Enablement	Guidelines, Environmental/social planning, Service provision	A non-beneficiary woman reported “We went four or five times…I don’t know how many times I have applied for name change in Aadhaar card, still it has not been done” A block level official reported, “Mismatching of beneficiary’s name in Aadhar card with bank account, resulted in difficulties for getting money in the bank account of beneficiaries. When we feed the form in the software, due to this …
Brown 2019	High	Other	[incentive form] Interview data indicated that the paper-based voucher system was not always well understood by customers and was reported to be a barrier to participation and could have therefore influenced voucher uptake.	Psychological capability	2	Knowledge	2	Education	Guidelines, Communication/marketing
Brown 2019	High	Other	[ Burdensome processes and limited capacity for support ] Issues with the reward offer which required more support to run the offer. Issues identified by store staff included: 1) being unsure of how to process the voucher in the store electronic grocery management system; 6) Supporting store staff proved challenging due to..variable expertise among store management in merchandising of fresh produ…	Psychological capability	2	Skills	1	Training	Guidelines, Service provision
Brown 2019	High	Other	[Contextual challenges to change] Community members described facing many challenges to healthy eating including high food costs and limited available money to spend on healthy food. Although the HCR program was valued and seen to encourage fruit and vegetable consumption, it was not enough to alleviate the high cost of food. [Preexisting structual and systemic challenges to deliver the intervent…	Physical opportunity	3	Environmental context and resources	5	Training, Environmental restructuring, Enablement	Guidelines, Environmental/social planning, Fiscal measures, Service provision	“It was really good.It encourages people to get more fruit and vegetables. AUD $10 doesn’t get you much, but it’s good”. “It’s expensive here, there is hardly enough money to buy food”. “AUD $10 only gets you two or three fruit and vegetables because of costings of the shop”.
Brown 2019	High	Other	[Target behaviour is not a priority: Norms and competing priorities] Some responders also reported that healthy eating was not a priority for everyone. e.g. there may be other competing priorities based on social factors that are viewed as more important or there may be basic challenges such as the inability to shop for groceries. This was particularly thought to be the case for people with littl…	Reflective motivation	5	Goals	11	Persuasion, Enablement	Communication/marketing, Service provision, Environmental/social planning
Parks 2020	High	Other	[ Technological and existing systems challenges] Several challenges were also identified when working with various retail food outlets, including implementation, tracking, and distribution and sourcing of local FVs. One barrier commonly cited was working with existing technology and POS systems. Also, Distribution methods included loyalty cards, coupons, or automatic discounts. If a retail outlet…	Physical opportunity	3	Environmental context and resources	5	Training, Environmental restructuring, Enablement	Guidelines, Environmental/social planning, Service provision	"They’ve changed to a different POS system, which has less flexibility. The system could not recognize an EBT customer in real time and a program had to be written to capture transactions”
Parks 2020	High	Other	[ Stigma against beneficeries] Interviewees reported some nuanced challenges with reaching low-income populations across their geographic regions. At all location types, potential stigma against SNAP benefits and incentives being used created a hurdle that was best addressed through education and continued implementation for stakeholders to recognize multiple benefits for the community.	Social opportunity	4	Social influences	6	Environmental restructring, Enablement, Modelling	Environmental/social planning, Communication/marketing	One interviewee described the need to overcome stigma, “There’s perceptions about farmers markets not being for everybody. That they’re for certain demographics’ income levels. So working against some of those narratives.”
Evans 2024	High	Other	[Inadeuate service providers/resources relative to service needs and nature] Given that fruit and vegetables are perishable and do not last an entire month, these data suggested that the potential effect of Food on the Move was being limited by serving 34 sites with 1 mobile market [ IF incentive structure Gift cards] Initially, Food on the Move issued the incentive to SNAP customers in the form …	Physical opportunity	3	Environmental context and resources	5	Environmental restructuring, Enablement	Environmental/social planning, Fiscal measures, Service provision
Silva 2023	High	Other	[Limited programme awarness ] Two themes emerged from respondents’ suggestions for improving the program: (1) increasing awareness of the program and .... Many vendors suggested awareness of the program needed to be improved. Vendors stated that markets need “More awareness and signage at markets	Psychological capability	2	Knowledge	2	Education	Communication/marketing	“Wish more people knew about it.” "Many customers are using tokens for the first time and were unaware of the program”
Silva 2023	High	Other	[ Burdensome administrative processes of the incentive] Administrative burdens especially for the SFMNP vouchers and tokens. Several vendors mentioned challenges with the administrative side of the program because of the burdensome management of tokens and coupons, [Limited funding] Two themes emerged from respondents’ suggestions for improving the program: (2) increasing funding for shoppers and…	Physical opportunity	3	Environmental context and resources	5	Environmental restructuring, Enablement	Environmental/social planning, Fiscal measures, Service provision	“Tracking the [SNAP] tokens and cards can be clunky,” “Senior coupons—keeping up and turning them in every two weeks . . . [was] more admin work.”
Silva 2023	High	Other	[Delayed reimbursment time] Many respondents also commented on the time it took for reimbursement. A couple of vendors said their biggest challenges were “Payment"	Automatic motivation	6	Reinforcement	14	Environmental restructuring, Incentivisation	Guidelines, Fiscal measures, Service provision	[it is a] two-week delay” and “Wait time to get money back. [It takes] about a month.”
Franckle 2023	High	Other	[Communication limitations] Also, it was reported that customers tried to use the coupoun at a non-participating store.	Psychological capability	2	Knowledge	2	Education	Guidelines, Communication/marketing
Franckle 2023	High	Other	[ Coupon redemention challenges:Human errors] The key barriers related to coupon redemption fell into two main categories: (a) human errors and; : Coupoun not scanned at correct point in transaction, scanned but handed cash back insead of discount application, applying diff. type of discounts ( flat $10 discount applied instead of 50% off.) , using it at non-participating store.	Physical capability	1	Skills	1	Training	Guidelines, Service provision
Franckle 2023	High	Other	[Low resonse rates - Cognitive overload] The log also cataloged that participants often did not answer both weekly and monthly income and SNAP usage questions on enrollment surveys.	Psychological capability	2	Memory, attention and decision processes	3	Environmental restructring, Enablement	Regulation, Environmental/social planning, Service provision
Franckle 2023	High	Other	[Communication channels failure and incomplete data collection]: several communication challenges with participants were documented. Communicating with participants (e.g., large group emails were rejected by servers, and the need for cell phone carrier information). Another challenge was that participants’ mailing addresses were not collected at enrollment, so if the study loyalty card needed to …	Physical opportunity	3	Environmental context and resources	5	Training, Environmental restrucuring, Enablement	Guidelines, Environmental/social planning, Service provision
Moore 2024	High	Other	[feeling-ill equipped to solve technical challnges] The transfer of purchasing data from CCT to ET4 website initially blocked by the schools server, The principal suggested that she felt ill equipped to solve the problem. [Digital literacy challenges] ) register for the scheme on the website 2) use school email and password to confirm identity. urban school, had difficulty activating their accoun…	Psychological capability	2	Skills	1	Training	Guidelines, Service provision	" ‘And I see an email [from the study researchers] about checking systems and I’m going, I don’t know how to check systems, I don’t do that ahh help!’ ‘It seemed like a lot because of the delay at the start. If that had happened cleanly, it would have all appeared much more spread out and calm and organised and in these steps, but that didn’t happen and therefore we had weeks of trying to get log…
Moore 2024	High	Other	[Teething problems and new interfaces] regarding operating the new till interface indicated that they were ‘wary at the start’ and there were some teething problems during initial implementation. For example, one canteen supervisor reported that it slowed the speed of service at the till at first. The supervisors also mentioned that reducing the habitual use of the ‘miscellaneous button’ and incr…	Physical capability	1	Skills	1	Training	Guidelines, Service provision
Moore 2024	High	Other	[Disruption of implementation process due to difficulities in registeration processes] These registration difficulties caused disruption at the start of implementation, which then reduced the weeks that the scheme ran in schools."The registeration processes was problematic not in terms of the time required and the impact on classes [ School based restrictiones and Limited time/ options to engage …	Physical opportunity	3	Environmental context and resources	5	Environmental restrucuring, Enablement	Environmental/social planning, Service provision	"‘In school we are always told to get off the internet and do what we’re doing or do what we are meant to be doing’ (M) ‘And so the Eat4Treats has been sitting with me, maybe for 10 days and a few of them approached me’ (Principal 1).
Moore 2024	High	Other	[Students embarassement of rewards] of the other difficulties relating to the process of claiming rewards: 2) embarassing if small prizes recived in front of other peers	Automatic motivation	6	Emotion	13	Persuasion, Modelling, Enablement	Communication/marketing , Evironmental/social planning
Moore 2024	High	Other	[Far-fetched FI targets] Pupils reported that criteria to receive the rewards seemed far fetched. Some of the rewards (particularly those with the highest monetary value) seemed unattainable during the time frame of the scheme	Reflective motivation	5	Beliefs about consequences	7	Persuasion, Modelling	Communication/marketing, Guidelines, Service provision	"‘Does it actually take about 900 years though to get a big prize?’"
Reese 2024	High	Other	[SPS adherence amind rapport building: balance challenges] The coaches noted that some participants were talkative on a range of topics but did not seem oriented toward discussing fluid consumption. The coaches recognized the importance of building rapport with participants and being an active listener, but also staying focused on the goal of health improvement. Therefore, an important skill that…	Psychological capability	2	Skills	1	Training	Guidelines, Service provision
Reese 2024	High	Other	[Interpersonal dynamics challenges to recrtuitment] The coaches also contended with the frequent need to tactfully engage with parents or guardians. In some cases, the parent or guardian was more motivated to schedule the SPS than the study participant. The coaches reported that engaging with parents or guardians could in some cases facilitate scheduling SPS sessions, but in other cases could ali…	Social opportunity	4	Social influences	6	Enablement	Guidelines, Environmental/social planning
Reese 2024	High	Other	[Nonresponse and engagement challenges due logitstica/contextual barriers of adolescents] Coaches and participants had the option of meeting in person, but the evaluations and subsequent meetings were almost always carried out by phone or video connection, a very useful option once the COVID-19 pandemic started [29]. One challenge was some participants’ nonresponse to requests for the initial SPS…	Physical opportunity	3	Environmental context and resources	5	Environmental restrucuring, Enablement	Environmental/social planning, Service provision
Reese 2024	High	Other	[Roles ambiguity challenges between SPS coaches and study coordinators] The role of the PUSH trial coaches was to engage eligible participants in SPS and help them implement solutions for fluid consumption. To avoid bias in outcome ascertainment between the intervention arm and control arm, the coaches’ role did not include asking about stones or evaluating the clinical information. The coaches’ …	Reflective motivation	5	Role and identity	9	Education	Communication/marketing, Guidelines, Regulation
Zulman 2013	High	Other	[Ambiguous knowledge transmission: cognitive load, clarity of communication, and decision-making processes, ] : One issue that arose in marketing the program was a need to unambiguously communicate the requirements for maintaining eligibility for financial discounts. Although the Walkingspree program had the capability to increase step-count goals over time, or allow participants to set personal …	Psychological capability	2	Memory, attention and decision processes	3	Environmental restructring		“Customer Service says,Averages are complicated; no one will ever be able to understand… We need to pick a number and go with a number.’” Another said, “We kept getting feedback that we can’t confuse our members. It has to be simple… You know, health insurance is confusing enough and then you complicate it with, well, you’ve got to do this, this, and this for that next month…”
Zulman 2013	High	Other	[ unclear product changes and decision making delays - Ambiguity and indecisiveness on intervention structure and messaging]	Psychological capability	2	Knowledge	2	Training, Environmental restructring, Enablement	Guidelines, Environmental/social planning, Service provision	“I would say to you that the single most difficult problem with this project was being able to wrap our arms around and define explicitly what the product changes weregoing to look like, what were the decisions … associated with change, and how arewe going to measure it and manage it. And I think it was very difficult because it was unchartered water … And there was some indecisiveness on the app…
Zulman 2013	High	Other	[State and federal policies] affecting program structure and the possibility of Discrimination or access to discounts based on medical condition. BCN leaders noted that great efforts were made to ensure that the new program met legislated requirements. In addition, several federal policies constrained the nature and size of incentives that could be offered. Also, HIPAA’s nondiscrimination provisi…	Physical opportunity	3	Environmental context and resources	5	Environmental restrucuring, Enablement	Guidelines, Legislation, Environmental/social planning, Service provision	“We wanted to make sure … that we were interpreting wellness incentives appropriately and as the legislation dictates.” “We always are very mindful of Department of Labor Health Insurance Portability and Accountability Act (HIPAA) guidelines as they are associatedwith wellness incentive plans,” “The federal law is very clear: there can be a 20 % spread of the total healthcare cost.” “A physician …
Zulman 2013	High	Other	[Coersion to join the scheme] Percived feelings of being forced to join. program indicate that the program’s effect came at a cost of ill-will from some individuals who felt coerced to participate. (31%)	Social opportunity	4	Social influences	6	Persuasion, Enablement	Communication/marketing, Guidelines, Regulation	“I don't enjoy being forced to sign up for something just because I don't fit into outdated guidelines for healthiness. Could I afford to lose some weight? Yes. But I'd prefer to do something about it because I wanted to, not because it was required.”
Gilson 2017	High	Other	[ Intervention incongurrent with context] Perceived lack of time, fatigue and poor physical infrastructure were commonly cited problems. Discouraging work environment and culture Reduction of 'on the job' physical activity due to the nature of the role. Manual tasks not as common as they were years prior. Depot manager comments provided different insights into healthy choice barriers, highlightin…	Physical opportunity	3	Environmental context and resources	5	Environmental restrucuring, Enablement	Environmental/social planning, Service provision	“I know all the things I need to do (to be healthy) but I’m also in a difficult position because of this particular job. I do a lot of interstate, often nine days straight. Literally, catching an hour sleep here or there. You are in so much of a hurry to meet deadlines.” “You work long hours and you need to make the money. I do think that sleep is a problem and also access to good food. Where do …
Gilson 2017	High	Other	[Intervention incongurrent with beliefs- limited incentive significance ] consensus from interviews indicated that improving health and wellbeing for its own sake, rather than for external reward, was the major determinant of change. The monetary value of the incentive (which was not significant by driver standards) may also have played a role in this dynamic. Consistent with these viewpoints, de…	Automatic motivation	6	Reinforcement	14	Incentivisation	Communication/marketing, Guidelines, Service provision	“The biggest reward is getting the result we want at the end, and it is to be a healthy driver. To achieve that, we don’t need $100 or $200 here and there.”
Gilson 2017	High	Other	[ Conflicting viewpoints of parties involved on behaviour change responsibility] management comments on ‘moving forward’ suggested that choices to effect and sustain healthy changes were up to drivers, while driver viewpoints tended to contrast with management perspectives. This last quote reflects the consensus put forward by drivers that the industry needed to take more responsibility for the h…	Reflective motivation	5	Role and identity	9	Education	Communication/marketing, Guidelines	“It is not so much the organisation’s responsibility it’s the individual’s. We can only do so much." “We would be more driven to try and achieve more if something came from the industry and they said ‘we are going to invest in this way’ to give you more time on the run. But the industry is so ‘hard-nosed’. The bottom line is dollars.”
Corder 2021	High	Other	Ambiguity of roles and responsibilities] and intervention processes ] uncertainty of the roles that subgroups played within GoActive. [observations] One of the key factors contributing to the lack of implementation appeared to be the uncertainty of the roles that each subgroup p layed Other contact teachers indicated that their SLT did not fully comprehend the intervention. Most of the time, resp…	Psychological capability	2	Knowledge	2	Education	Guidelines, Communication/marketing, Regulation, Service provision	Initially I didn’t realise how much was involved and, to be honest, I don’t think my head [head teacher] knew how much was involved, I think he thought it would be, I don’t think he’d maybe read the information through and he didn’t realise, I think he thought it might be a month or two thing, done, he didn’t realise it was going to go on." "We never really got to use it though because we weren’t…
Corder 2021	High	Other	[ Competency and assumed "digital literacy" ] Primary factors that may have contributed to the lack of implementation include a lack of Year 9 engagement. Year 9 students relied on the mentors to be competent at the GoActive activities, prepare the equipment, explain the rules, interact with those who were not engaging, and continuously encourage those who did not participate. Furthermore, mentor…	Psychological capability	2	Skills	1	Training	Guidelines, Service provision	"Yeah, because I’m going to have to add on like sixty things because I’ve forgotten them for so long, and then like I get reminded and then I’ve forgotten the password or whatever, and then you have to e-mail them and it’s a bit . . ." "Couple of times they’ve shown us the cards with the different selection of activities and we’ll talk about which ones we want to do and generally there’s only foo…
Corder 2021	High	Other	[Cognitive demand of using the incentive website] Also, issues encountered with the he GoActive intervention website: (2) they found the website hard to access or (3) they lost their username and/or password. Year 9 students discussed technical challenges to accessing the website, along with an inability to remember their password and sign-in for the website to log points, as key barriers. Partic…	Psychological capability	2	Memory, attention and decision processes	3	Training, Environmental restructring
Corder 2021	High	Other	[limited institutional support and logistical barriers] Primary factors that may have contributed to the lack of implementation include uncertainty of the roles subgroups played within the GoActive intervention,a lack of institutional support for contact teachers and school-level constraints (e.g. PA uniform took time to change, , limited facility space and equipment to run PA activities, resourc…	Physical opportunity	3	Environmental context and resources	5	Training, Environmental restrucuring, Enablement	Guidelines Environmental/social planning, Service provision	This was reinforced by the contact teacher at school G: "I’ve found that that has been the biggest pressure of it, that I may . . . Because I am the head of year by myself, I haven’t got an assistant, I haven’t got anyone else helping me and I’ve found that this has been, not something that, but I just haven’t been able to impart as much of my time on this as maybe I want to but I’m just unable t…
Corder 2021	High	Other	[Interpersonal barriers due to peer hierarchy and group norms] Year 9 student behaviour, attitudes and engagement were discussed as a challenge to implementation by mentors and Year 9 students themselves. The age gap between the year groups, mostly for those mentors who were in Year 10, was constantly cited by mentors as an issue for managing attitudes and behaviour within the Year 9 cohort. Ment…	Social opportunity	4	Social influences	6	Environmental restructring, Enablement	Guidelines, Regulation, Environmental/social planning, Service provision	They wouldn’t listen to us because we’re just students as well. So you’d tell them what to do and then they’d do it for like 5 minutes and then it’d just turn into like a free-for-all. Mentor focus group, school E " Once we kind of got them involved, we kind of had like a few, like maybe three or four boys that weren’t involved and they were kind of like swaying the whole class." Mentor focus gro…
Corder 2021	High	Other	[ Implementation inconsistencey and demotivation due to failed/ delayed/unreliable reward system] Although the intervention protocol indicated that mentors would do this, this was not implemented at every school, with form teachers or GoActive contact teachers tasked with reward distribution. Although rewards were distributed to the GoActive schools at the start of the intervention, participants …	Automatic motivation	6	Reinforcement	14	Environmental restructuring, Coercion	Guidelines, Regulation, Service provision, Environmental/social planning	" I’m disappointed with that to be honest . . . I logged all my points to get my stuff ages ago and they haven’t come yet." S3: At the end no one [Year 9 students] really cared because like, you know how you could win things like jumpers? At the very beginning I won a jumper and I asked for it, and they were like, ‘Yeah, I’ll get it for you’. Researcher: Who? S3: Our mentors . . . S S4: We were n…
Jose 2022	High	Other	[ unclear study information to participants] During pilot phase , issues relating to communication clarity with participants, Some confusion about the distinction between the app and the accelerometer amongst pilot study participants which led some to stop using the accelerometer if the app malfunctioned. S: modifications included improving study information provided to participants,	Psychological capability	2	Knowledge	2	Education	Communication/marketing
Jose 2022	High	Other	[ Cognitive overload and missed steps: Consent and logistic errors procedures] During Audit phase revealed some inconsistencies in the consent process, and confusion about assessment requirements. Some participants not given current Participant Information Sheet and Consent Form (PICF) : S: correct PICF provided to and signed by respective participants + iImproved record keeping of PICF version a…	Psychological capability	2	Memory, attention and decision processes	3	Training, Environmental restructring, Enablement	Guidelines, Environmental/social planning, Service provision
Jose 2022	High	Other	[Covid-19 During programme implementation led to early termination] Project was terminated early as a state of emergencey was declated where From March 25, 2020, cashless bus fares were introduced, and a bus fare amnesty was in place from 27 March 27, 2020, to the May 31, 2020. Study investigators stopped trips4health on May 14, 2020, because of the broadscale social changes imposed by COVID-19, …	Physical opportunity	3	Environmental context and resources	5	Environmental restrucuring, Enablement	Environmental/social planning, Service provision	"found the biggest and really the only factor as to whether or not I catch the bus to work is the actual requirements of my work. Sometimes I am required to have my car at work and use it for work and sometimes I am not " " I have struggled to increase my bus trips in recent weeks. My lifestyle is not conducive to manage the trips on a regular basis." Service There are no buses in X so I cannot t…
Jose 2022	High	Other	[Fear of utilising the service due to antisocial behaviout] Anti-social behaviour on bus, so clients feel the need to pick certain times to catch a bus.	Automatic motivation	6	Emotion	13	Enablement	Environmental/social planning, Service provision	"But the route I’m on, …. they’re drinking alcohol on the bus and stuff … So, that’s why I’m saying I pick which buses to catch and at what times. "
Hagedorn 2014	High	Other	[Cost, time and staff burden as barriers to intervention adoption ] When asked about barriers to adopting the intervention as part of standard clinical treatment, the most common theme( n=6), was cost. An additional barrier mentioned by three respondents was allocating staff time to administer the intervention. All 3 leaders of the participating clinics indicated that they were interested in impl…	Physical opportunity	3	Environmental context and resources	5	Environmental restrucuring, Enablement	Environmental/social planning, Fiscal measures, Service provision	“The time commitment would be a barrier. You need staff that would be in charge of this. The expense would also be a barrier. I see the lab costs as being the most expensive cost. Sending confirmations to the lab is very expensive but I think it’s really important that we do that.” “The biggest barrier is that I would have to pull staff from other tasks in order to do it. There are only so many s…
Hagedorn 2014	High	Other	[lClinicans resistance to rapid urine testing used by the scheme] A major barrier to integrating the intervention into clinic processes at 1 facility was that the clinicians did not want to rely on the rapid urine test cups for clinical testing of substance use. Instead, they preferred to send samples directly to the laboratory. This created a great inconvenience for patients who were often asked…	Reflective motivation	5	Role and identity	9	Persuasion, Modelling	Communication/marketing, Guidelines, Service provision
Hartzler 2015	High	Other	[Resistance and Hesitancy due to anticipated administrative burden] initally, providers resisted adding CM procedures to busy clinical interactions early in treatment. The administrative burden of adding CM procedures to busy clinical interactions early in treatment, the added time required of CM procedures, was noted and another identified additional staffing resources needed to support internal…	Reflective motivation	5	Beliefs about consequences	7	Education, Persuasion, Modelling	Communication/marketing, Guidelines, Service provision	“Well, as for challenges that [the CM intervention] presents…it is an extra component added to an already loaded initial treatment burden that counselors have with folks coming into treatment. So, that is an extra burden. But it seems to be worth it to staff, I hear good things from them about how rapport with new patients is better now”. “Admittedly, I went into this with trepidation. Asking my …
Brolin 2017	High	Other	[Difficult calculating productivity metrics] RSNs reported difficulty in calculating their productivity under this new system and concern that they were not meeting productivity benchmarks.	Psychological capability	2	Skills	1	Training	Guidelines, Service provision
Brolin 2017	High	Other	[Complexity of the FI structure] The complexity of the incentive program may also have been a factor to hinder the intervention uptake and utilisation. There were 12 possible incentives that could be earned over a 90-day period, with varying time periods and flexibility. This schedule may have been challenging for the clients to understand given its complexity. The fact that there was flexibility…	Psychological capability	2	Memory, attention and decision processes	3	Environmental restructring
Brolin 2017	High	Other	[Implementation challenegs due to complex population needs] 1) The complexity of how and where to communicate the intervention. RSNs who participated in the Learning Collaborative, however, felt that recruiting for RSN services was best done in the detoxification facility because of the access to clients. As once clients leave detoxification and re-enter the community, it is much more difficult t…	Physical opportunity	3	Environmental context and resources	5	Environmental restrucuring, Enablement	Environmental/social planning, Service provision
Brolin 2017	High	Other	[Roles conflict: Juggling between "hats"]There were also complexities related to accommodating multiple insurers. MBHP is one of many payers for detoxification services in the Commonwealth. Study RSNs were often required to wear both the hat of a community support worker for non-study clients and the RSN hat for study-eligible clients. The added burden of juggling a mixed caseload, coupled with t…	Reflective motivation	5	Role and identity	9	Education, Enablement	Guidelines, Regulations, Service provision, Environmental/social planning
Brolin 2017	High	Other	[Shaky buy-in, Negative providers attitudes about incenitves for this population] The research team engaged staff at the provider organizations to get their input and buy-in. The administrators at the intervention providers were very interested in participating and were engaged in the design of the incentive component. This attitude, however, appears not to have been shared by all of the RSN staf…	Reflective motivation	5	Beliefs about consequences	7	Education, Persuasion, Modelling	Communication/marketing, Guidelines, Regulation, Service provision
Becker 2019	High	Other	and actual recruitment challnges] related to patient flow or p and lack of "appropriate patients" Of note, the most common patient-level barrier was lack of “appropriate clients”: this could reflect actual recruitment challenges, insufficient patient demand, or provider misperceptions about CM’s applicability. [Staff resources] encompassed issues related to staff time, attitudes, or qualification…	Physical opportunity	3	Environmental context and resources	5	Environmental restrucuring, Enablement	Environmental/social planning, Fiscal measures, Service provision
Becker 2019	High	Other	[Percieved lack of demand as a barrier to adoption] staff attitudes were cited as issues to adoption including perceived demand including lack of admin .Analyses of provider-reported barriers confirmed the hypothesis that the SSL would be less effective among providers that perceived more patient-level barriers, perhaps due to the SSL’s explicit focus on provider- and organization-levels.issions …	Reflective motivation	5	Beliefs about consequences	7	Persuasion	Communication/marketing, Service provision
Desrosiers 2019	High	Other	[Complex population needs: low-functioning level] The clinicians linked the difficulty to implement the approach with group A with the patient’s lower level of daily functioning the patients. Indeed, patients in group A presented a housing and financial precariousness that can point to difficulties to integrate new habits, to respect commitments and respect a schedule.	Psychological capability	2	Memory, attention and decision processes	3	Environmental restructring, Enablement
Desrosiers 2019	High	Other	[ Delayed FI incongurrent with complex population needs] it was shared that the reality as a drug addict wasn’t consistent with the way the tokens were distributed. The participant opined that her substance use problem accustomed her to get things in a short period of time, which didn’t make it easy for her to wait 6 weeks for the drawing session. [ Limited time for optimal implementation and lim…	Physical opportunity	3	Environmental context and resources	5	Environmental restrucuring, Enablement	Environmental/social planningService provision	I would have liked to dip draw right after having 4 tokens, it makes more sense in my head to get something right now instead of waiting six weeks…probably I think like that because I’m a drug addict.
Desrosiers 2019	High	Other	[ Unpersonalised tokens that are easy to lose and mean less] Different participants reported that the tokens had little symbolic value to them. They asserted that the tokens were not personalized which made them cumbersome and easy to lose.	Automatic motivation	6	Emotion	13	Persuasion, Incentivisation	Communication/marketing, Environmental/social planning	"It's bulky and they are not personalized. It's an object, which in fact is connected to nothing concrete, and we can lose them too."
Desrosiers 2019	High	Other	[One-sided partnership- limited active participation of co-investigators] Furthermore, as the co-investigator conducted the drawing sessions and the purchase of gifts they felt that they hadn’t had an active participation in its implementation. That they could have further promoted the contingency management during the recruitment process if they had been more involved in the organisation, planni…	Reflective motivation	5	Role and identity	9	Persusion, Modelling	Communication/marketing, Guidelines, Service provision
Desrosiers 2019	High	Other	[initial skepticism towards CM benefits and Ethical fit] Health professionals’ perspective on the acceptability of the contingency management. During the first consultations with the health professionals of the COD program, they demonstrated openness to the possibility of implementing this approach with their clients but also expressed doubts about the real benefits of this approach. The health p…	Reflective motivation	5	Beliefs about consequences	7	Education, Persuasion, Modelling	Communication/marketing, Guidelines, Regulation	"I was sceptical at first, because I wondered if it was necessary. If there were no other acceptable privileges that could’ve been implemented instead."
Becker 2021	High	Other	[ Challenges due to unexpected event: COVID-19: Fear of contagion given the nature of incentive delivery ] One of the most common barriers was fear of contagion, both in terms of the risk of getting patients sick or of catching the virus them- selves. This barrier was articulated by 5 OTP respondents (one leader, four counselors). Fear of contagion was predominantly driven by the logistics of CM …	Physical opportunity	3	Environmental context and resources	5	Training, Environmental restrucuring, Enablement	Guidelines, Environmental/social planning,Fiscal measures, Service provision	One counselor noted that they could not figure out “the issue with how do we try to do this without everybody touching papers in a bowl with COVID. ” “doing it on the phone is horrible. Clients sometimes do not pick up, or to contact them is more difficult because they do not have to come every day to here. ” “over the phone it’s very dif- ficult to say who is engaged and who is not. “we’re not r…
Becker 2021	High	Other	[High-risk popualtion and conflict of the intervention benefits vs safety] Notably, several respondents commented that their patients were especially vulnerable to COVID-19 due to a variety of risk factors includ- ing smoking, unstable housing, mental health issues, and substance use.. One OTP counselor shared her view that the program’s priority had to be limiting the patients’ exposure to COVID…	Reflective motivation	5	Beliefs about consequences	7	Education	Communication/marketing, Guidelines, Service provision	“it’s the unknown of basically what’s gonna happen —now we have close to 600 patients in the program. We’ve really expanded. Now it’s about keeping them safe…. ”
Metrebian 2021	High	Other	[User use issues] participants being unable to self-login at the pharmacy although these were quickly resolved early on. Of 500 messages sent out over the entire study period, 383 (77%) were successfully delivered to participants. Reasons for unsuccessful delivery included mobile phone turned off to conserve charge.	Psychological capability	2	Skills	1	Training	Guidelines
Metrebian 2021	High	Other	[low uptake] Recruitment of the target population was not feasible; fewer individuals than expected presented for a new episode of opioid agonist treatment (OAT), were prescribed methadone, or attended one of the three participating pharmacies. staff acknowledged the low numbers of new opiate users presenting to services .Staff suggested changes to eligibility criteria in a future confirmatory tr…	Physical opportunity	3	Environmental context and resources	5	Environmental restrucuring, Enablement	Environmental/social planning, Service provision
Winograd 2022	High	Other	[ lack of clarity about the legal status of FTS relative to Missouri’s drug paraphernalia law] In Missouri, it is a Class E felony if a person “uses, or possesses with the intent to use,” items used to test drugs pre-consumption, but it is not illegal to possess FTS for their “on-label” use of post-consumption urine testing. Though researchers have found greater evidence of behavior change when F…	Psychological capability	2	Knowledge	2	Education	Guidelines, Communication/marketing, Regulation
Winograd 2022	High	Other	Agencies - grants and Missed opportunities to reach Populations in need ] None of the 12 treatment agencies that applied for CM funding served Black men in St. Louis (the only St. Louis-based agency awarded a CM pilot grant is a women-only program). First, racial inequities in overdose deaths in Missouri have grown considerably in recent years. Though these disparities are driven by deaths among …	Physical opportunity	3	Environmental context and resources	5	Environmental restrucuring, Enablement	Regulation, Legislation, Environmental/social planning, Service provision
Winograd 2022	High	Other	Initial hesitancy with reset mechanisms and enforcement of CM mechanisms ] Clinicians discussed initial hesitation with enforcing the reset contingency for non-adherence to the target behavior. After gaining experience doing so with an appropriate explanation to clients, they became more comfortable with resetting clients and reported seeing its importance.	Reflective motivation	5	Beliefs about capabilities	8	Education, Enablement	Communication/marketing, Guidelines, Service provision
Green 2023	High	Other	[Challenging skill set to manage incentives] his complexity poses a challenge for the CM provider to calculate and distribute the correct incentive at each visit. Participants shared that even with the Excel tracker aiding in the process they needed to make additional administrative decisions about:who would manage the gift card purchasing, how and where to store the gift cards, and how to establ…	Psychological capability	2	Skills	1	Training	Guidelines, Service provision
Green 2023	High	Other	[Unclear Traget populations and referral conflicts] During intital implementation, unclear target population and client modifications across different sites and lack of awareness from referring organisations/agents. As a result, sites had to adjust how they were going to receive referrals and identify appropriate participants for the programme (narrowing the client base and tailoring the availabi…	Psychological capability	2	Knowledge	2	Education	Communication/marketing, Regulation	"I was slightly unclear on the specific population when we were looking into the grants. I think we all thought, “Hey, this would be great for our prerelease [referred by drug court] residents.” And the more we looked at it’s like, “Oh no,” it’s somebody who is in active use and is needing to get some external motivation to work towards abstinence."
Green 2023	High	Other	[Admin capacity: cost, time, staff and limited resources] During intervention adoption, concerns among provided related to administrative processes particularly related to cost and staff time time concerns and organizational capacity to implement the program and carry out onboarding processes in light of staff trunover which limits knoweledge accumulation. During Inital implementation, Interventi…	Physical opportunity	3	Environmental context and resources	5	Environmental restrucuring, Enablement	Regulation, Legislation, Environmental/social planning, Service provision	"Our biggest concern was the ability to staff the program. We’ve been pretty short-staffed in a lot of areas. It’s been difficult to find clinical staff and retention has been an issue. Our numbers in the programs haven’t really diminished. So, for me, that was a concern" "I am booked eight to five, Monday through Friday, and I’m scheduled outabout a month at a time. So, any kind of schedule chan…
Green 2023	High	Other	[Hesitancy toward CM/FI - Philosphical objections and attitudinal shift] A recognition that CM is an attitudinal shift from abstinence-based treatment models. Staff at FQHCs shared how their organization had addressed staff hesitancy toward non- abstinence-based treatment models during implementation of MOUD. State-approved treatment providers, who had less prior experience with the provision of …	Reflective motivation	5	Role and identity	9	Education, Persuasion, Modelling, Restriction	Commuinication/marketing, Guidelines, Regulation, Service provision	" And so, we’re accustomed to them not being able to have any violations on the UDS. For us to be able to incentivize and reward behavior for a negative stimulant UDS, but to still have alcohol or other things showing up on a UDS, that for me is a little challenging. I do understand the broad picture and the logical concept behind it but it’s just a different way of thinking" "To me it seemed con…
Curran 2023	High	Other	[Ill equippedchallenge current practices for a highly educated Youth] As many of the young people highly educated and present their own views of cannabis use. Staff felt challenged and ill-equiped with evidence and skills to implement CM and lack of training in these areas was considered a potential barrier to future delivery. . Staff expressed a need for training to build their confidence in con…	Psychological capability	2	Skills	1	Training	Guidelines, Service provision
Curran 2023	High	Other	[Limited resources, cost/benefit and competing priorities] Almost all interviewees reported the limited costs and competing priorities . How CM fits with the work of mental health practitioners, resource limitations. Scarcity of NHS resources was raised as a barrier to implementing CM in EIS in every interview and focus group with managers and staff. Three main resource barriers emerged: limited …	Physical opportunity	3	Environmental context and resources	5	Environmental restrucuring, Enablement	Guidelines, Regulation, Environmental/social planning, Fiscal measures, Service provision	“If it’s done properly, it would take. . .quite a bit of time and finding that time would,. . .be quite difficult within the current constraints.” “I obviously understand that in the long term this is saving a lot of money, if it works. . . having the money right there and handing it over. . . feels more real than just giving them an hour of someone’s time. . . it feels more like you’re just thro…
Curran 2023	High	Other	[Mixed staff views on CM; ethical concerns] Ethical concerns and seeking evidence as a driver for non-adoption. Concerns about who should deliver CM, potential impacts on the therapeutic relationship, ethical concerns. Did not deliver [Service fit, and its impact on thrapeutic relationship ] The majority of EIS staff were concerned about the possible negative impacts of urine-testing and payment …	Reflective motivation	5	Role and identity	9	Education, Persuasion, Modelling	Communication/marketing, Guidelines, Service provision	One staff member admitted they would not want to use CM in their personal practice even if there were good evidence of effect: “I’m accountable for my own practice . . . I personally wouldn’t feel very comfortable with it, getting into an area of work where I’m doing [urine drug screens] with someone, giving them money. It’s a very long way from the way that I’ve worked with people. . . I’d be in…
Curran 2023	High	Other	[ Limited evidence as a driver for non-adoption] However, most participants who voiced concerns (and reasons for non-adoption) balanced this by suggesting this could be over-ridden by evidence of effectiveness. [Challenges to enforce abstinence target due to mixed-evidence and client education levels - fear of being percieved as not scientifcally motivated] Staff felt challenged and ill-equiped w…	Reflective motivation	5	Beliefs about consequences	7	Education, Persuasion, Modelling	Communication/marketing, Guidelines, Regulation Service provision	“I guess if it works . . . if the data shows that it has a big impact, then, you know, and it’s cost effective, then why not? So, I think we just feel uneasy about it involving money.” (staff member 2, focus group 2) “[some staff] have a slight objection to kind of urine testing people. So, they think that, you know, you should go with what the client tells us. So, if the client tells you they’re…
Cohen 2023	High	Other	[The Physical aspect of behaviour test validation and population needs] had some difficulty; For some patients and those with lung disease, the physical aspect of testing, either providing a breath sample for the breathalyzer or having a finger stick for PEth, led to some frustration. [Unexpected external event and understocking] VA patient participants in this study were given VCS coupons to red…	Physical opportunity	3	Environmental context and resources	5	Environmental restrucuring, Enablement	Environmental/social planning, Fiscal measures, Service provision	“… the only thing I had a problem with was the breathalyzer. I couldn’t hardly blow it—I couldn’t blow those breathalyzers.” “Our Canteen is scantily stocked and I was just thinking that if we had had a woman in… I think that she would be extremely disappointed…I find, some of the things that I think do not speak to women or do not let women know that the VA appreciates them." “I would say if the…
Cohen 2023	High	Other	[Deflating Prize draws] Staff noted som patients were not engaged by the VCS coupons; A slip of paper drawn from the prize bowl saying “good job” rather than a monetary reward and saw that this could be deflating.	Automatic motivation	6	Reinforcement	14	Environmental restructuring, Incentivisation	Guidelines, Communication/marketing	"Well, you know I mean it was like you know almost like a trick, they got tricked. You know they were expecting to get some like a tangible reward and only got the good job. So, a lotta times when they pulled those you could see the disappointment on their face”
Cohen 2023	High	Other	[Negative perception of the intervention and objections toward the "cash" incentive"] Staff noted that some patients were not engaged by the VCS coupons; and one patient expressed concern about using cash as prizes. [Privacy concerns on integrating the intervention within HIV clinic] Staff expressed privacy concerns about integrating alcohol treatment within the HIV clinic. One staff member share…	Reflective motivation	5	Beliefs about consequences	7	Education, Modelling	Communication/marketing, Guidelines,Regulation, Service provision	“When I was trying to recruit patients and I told them that it would be Canteen vouchers like commissary vouchers, some people were like oh that’s it?”Patient participant 2 stated a preference for specific types of incentives and against cash: “Yeah. Yeah. But I wouldn’t recommend cash. You know what I’m saying? And I, I think I see …you know, you can go and, you can buy drugs with cash. … buy dr…
Parent 2023	High	Other	[Legalisation, funding constraints and medicaid reimbursement caps] At the time of the writing of this paper, the Substance Abuse and Mental Health Services Agency (SAMHSA) capped the use of State and Tribal Opioid Response funding for CM reinforcers at $75 per person per year (Knopf, 2021). A key principle in the mechanism of positive reinforcement to induce behavior change is that the reinforce…	Physical opportunity	3	Environmental context and resources	5	Environmental restrucuring	Guidelines, Legislation, Environmental/social planning, Fiscal measures
Parent 2023	High	Other	[Clash of treatment philosphies and organizantional culture impact on implementation] CM protocol incongurrent with treatment approach:, ccontradicting existing philosophy affected buy-in ;Court-ordered treatment requirements can violate CM fidelity- Concerns about CM contradicting existing philosophy affected sites’ buy in and that stigma toward patients as a CM implementation barrier resulting …	Reflective motivation	5	Role and identity	9	Education, Persuasion, Modelling	Communicarion/marketing, Guidelines, Regulation, Service provision
Parent 2023	High	Other	[Inadequate incentive magnitude misaligned with evidence] At the time of the writing of this paper, the Substance Abuse and Mental Health Services Agency (SAMHSA) capped the use of State and Tribal Opioid Response funding for CM reinforcers at $75 per person per year (Knopf, 2021). A key principle in the mechanism of positive reinforcement to induce behavior change is that the reinforcer provided…	Automatic motivation	6	Reinforcement	14	Environmental restructuring, Incentivisation	Guidelines, Fiscal measures, Service provision, Environemental/social planning
Parent 2023	High	Other	[Limited percieved accuracy of behaviour validation] Some providers reported a) concerns about drug screen accuracy	Reflective motivation	5	Beliefs about consequences	7	Education, Modelling	Communication/marketing, Service provision
Hallgren 2023	High	Other	[Remote nature and Onboarding challenges for a unique population] Was a Barrier for Some Patients Who Use Methamphetamine. 46% of the participants were not able to complete the necessary tasks for onboarding to the intervention as it was protocolized for this study, potentially because of fatigue associated with both the research activities (ie, screening, consent, and baseline assessment) and th…	Psychological capability	2	Memory, attention and decision processes	3	Environmental restructring, Enablement
Hallgren 2023	High	Other	[Clinician barriers to mhealth preperadness for uptake] Reported by clinicians including: Low clinician familiarity [Percieved limited digital literacy and use of testing tools]	Psychological capability	2	Skills	1	Training	Guidelines, Service provision
Hallgren 2023	High	Other	[ Physical Cumbersome testing requirements and early disengagement] Additionally, difficulities in testing resulted in low cmpletion rate to verify quit status. (QUAL) Substance tests were difficult to perform , it was required to have the larger and cumbersome test kits and supplies at hand all times to respond to the random testing alert which also was required to be done by inconcivent testing…	Physical opportunity	3	Environmental context and resources	5	Environmental restrucuring, Enablement	Environmental/social planning, Service provision	Because you could even still go into, ’do you have a phone? Do you need access to a phone? Do you have space for yourself in your own environment where you can focus on doing a couple things for your recovery, even if it's the app or your own mindfulness meditation on your phone?’ All of that wrap together where you can talk about creating space for that. What does the space look like? Daily remi…
Hallgren 2023	High	Other	[lack of motivation and early disengagment] participants who disenrolled early cited lack of motivation and intetrest among others. 7% early disenrollment due to lack of motivation.	Reflective motivation	5	Goals	11	Persuasion, Incentivisation, Modelling	Communication/marketing, Service provision, Fiscal measures
Hallgren 2023	High	Other	[Frustrations due to complex and lenghty Mhealth Processes]	Automatic motivation	6	Emotion	13	Persuasion, Modelling, Incentivisation, Enablement	Communication/marketing, Service provision, Environmental/Social planning	“Some patients really struggled to get in and remain engaged in the program….It was really frustrating, and didn't allow us to strike while the iron was hot. For some people, there definitely were technological and logistical issues, in terms of using the app and getting the video right and all of that. Even utilizing some of the tox screen swabs initially [was challenging]. So sometimes that see…
Hallgren 2023	High	Other	[Barriers to mhealth preperadness for uptake] Reported by clinicians including: Concerns about incentive structure, Implications of repeat treatment and Perspectives on sustainability and cost effectiveness. User reported barriers included: percieved Delay in treatment effect and Limited effectiveness for abstinence for some patients leading to low engagment	Reflective motivation	5	Beliefs about consequences	7	Education, Modelling	Communication/marketing, Guidelines,Regulation, Service provision
Hallgren 2023	High	Other	[Lower than expected incentive value]	Automatic motivation	6	Reinforcement	14	Incentivisation	Guidelines, Fiscal measures, Service provision
DePhilippis 2023	High	Other	[Funding limitations/poor management of funds] Most of the VA facilities that had been allocated funds to implement CM went through the funds relatively quickly, and no further funds were initially available from the VA. This put the program in jeopardy, as very few facilities had discretionary funds that were available to sustain the program. [Burdensome Frequent procedures, organisational proce…	Physical opportunity	3	Environmental context and resources	5	Environmental restrucuring, Enablement	Regulation, Environmental/social planning, Fiscal measures, Service provision
Gorman 2024	High	Other	[Unexpected extrernal events] When deciding to implement this protocol, a major decision-point for the program was the need for efficiency. The clinic often stacked injection appointments to specific days and times of the week, and a decrease in nursing staff availability created an increase in wait times, so HTCM was implemented to decrease frequency and duration of in-person contact during the …	Physical opportunity	3	Environmental context and resources	5	Environmental restrucuring, Enablement	Environmental/social planning, Service provision
Jakubowski 2024	High	Other	[System Level and organizational policesPolicies] Five of the six OTPs rated both system-level leadership and system-level policies as barriers or neutral; there was universal uncertainty about the extent of federal support and state and federal policies and regulations around CM. Moreover, there seemed to be broad uncertainty about whether the state-level leadership support would be sustained. A…	Physical opportunity	3	Environmental context and resources	5	Training, Environmental restructuring, Enablement	Guidelines, Legislation, Environmental/social planning, Fiscal measures, Service provision	("If they exist, I don’t know what they are." Site 102).
Jakubowski 2024	High	Other	[lack of community support] On community support: Three items comprised this sub-domain: community support; community buy-in; and partnerships with other organizations. The six OTPs universally rated community support and community buy-in as barriers or neutral (median ratings of 1.0). Yet, these determinants were generally rated as low importance because OTPs reported that community organization…	Social opportunity	4	Social influences	6	Environmental restructring, Enablement	Guidelines, Regulation, Environmental/social planning, Service provision	OTPs reported that community organizations do not have “any say over our practices” or “don’t really support our treatment ideas anyway” (Sites 101 and 104).
Smoker 2025	High	Other	[ Structural/contextal referral gaps and recruitment challngesl] In contrast, lack of opportunity (patient referrals) was more frequently experienced than anticipated. In fact, this barrier was not anticipated by any study participants, though it was noted in the SUD field in general (Blevins et al., 2018) as well as in other Indiana EBP training programs. [Unexpected Organizational readiness and…	Physical opportunity	3	Environmental context and resources	5	Tranining, Environmental restrucuring, Enablement	Guidelines, Legislation Regulation, Environmental/social planning, Fiscal measures, Service provision
Smoker 2025	High	Other	[Values- implemntation/evidence misalignment: Non-adoption of abstinence-based CM (due to cultural/logistical/value conflicts) despite evidecne] It is notable that not a single site elected to reinforce drug abstinence despite strong empirical evidence of its efficacy and encouragement during the CM training and TA calls. A multitude of reasons existed as to why sites selected a different target …	Reflective motivation	5	Role and identity	9	Restriction, Environmental restructuring, Enablement, Modelling	Guidelines, Regulation, Environmental/social planning, Communication/marketing
Research Triangle Institute and National Academy for State Health Policy 2017	High	Other	[lack of understanding of incentive delivery/clain processes] Additionally, some participants had difficulty accessing the ChipRewards system and actually redeeming points for items. Other participants did not realize that they were eligible for incentives, did not understand the process, and never redeemed their incentives New York also discussed the complexity of its incentive schedule, noting …	Psychological capability	2	Knowledge	2	Education	Guidelines, Communication/marketing, Service provisions
Research Triangle Institute and National Academy for State Health Policy 2017	High	Other	[Time -extensive Planning and unanticipated delays] it would be and required flexibility and more planning than anticipated. States found that starting up their programs took longer than anticipated. Reasons for implementation delays included the need to hire and train staff, obtain Institutional Review Board (IRB) approval, and formalize partnerships and contracts. This resulted in delays for si…	Physical opportunity	3	Environmental context and resources	5	Tranining, Environmental restrucuring, Enablement	Guidelines, Environmental/social planning, Fiscal measures, Service provision
Research Triangle Institute and National Academy for State Health Policy 2017	High	Other	Additionally, FQHCs were uncomfortable with distributing financial incentives. Rather than giving participants the entire amount of money they were entitled to receive, some health centers meted it out in small amounts.	Reflective motivation	5	Role and identity	9	Restriction, Environmental restructuring, Enablement	Guidleines, Regulation, Environmental/social planning, Service provision
Research Triangle Institute and National Academy for State Health Policy 2017	High	Other	[Revised targets and goal-setting misalignment] California initially planned to target its smoking cessation program to Medicaid beneficiaries that had diabetes and other chronic diseases. Within the first 6 months of implementation, California changed its program to include all Medicaid beneficiaries who smoked and not just those with chronic diseases. This change was driven by concerns that the…	Reflective motivation	5	Goals	11	Modelling, Enablement	Service provision, Environmental/Social planning
Research Triangle Institute and National Academy for State Health Policy 2017	High	Other	[Concerns about the controversial nature of the intevention] Challenges that arose were in part due to States’ concerns in implementing randomized controlled incentive programs for the Medicaid population. This type of program was a new concept, and some State governments were initially concerned that these programs would be controversial. California worked closely with its Office of Public Affai…	Reflective motivation	5	Beliefs about consequences	7	Education, Persuasion, Modelling	Communication/marketing, Guidelines,Regulation, Service provision
Perry 2019	High	Other	[ Challenging intervention processess and need of ongoign support] challenging set tasks, and infrequent face to face peer support among others. Participants in Diabetes prevention and diabetes management programs shared that : tracking all meals was challenging and, at times, discouraging. Some weight management participants were not aware of the program end date and expressed frustration that t…	Psychological capability	2	Behavioural regulation	4	Training, Education, Modelling
Perry 2019	High	Other	[Lack of awarnss of intervention end date]Some weight management participants were not aware of the program end date	Psychological capability	2	Knowledge	2	Education	Communication/marketing
Perry 2019	High	Other	[lack of training and understanding of needs] Some smoking cessation participants shared concerns about program staff being untrained or unfamiliar with addictions or lacking understanding of a smoker’s experiences in trying to quit.	Psychological capability	2	Skills	1	Training	Guidelines, Service provision
Perry 2019	High	Other	[ building trust] Some participants in these programs were reassigned to new staff, which confused participants when new staff contacted them; establishing trust with new staff members was also challenging. [Frustrations built up in the client-provider relationship] Across most programs,participants who did not have a positive experience with program staff described being frustrated by their inte…	Social opportunity	4	Social influences	6	Environmental restructring, Enablement	Guidelines, Environmental/social planning , Service provision
Perry 2019	High	Other	[Logistic and eligibility barriers for programme enrollemnet] ; some MIPCD programs included barriers that delayed participants in joining the programs when they wanted i.e. paperwork and eligibility. Enrollment paperwork for some programs required considerable time and effort to complete; yet, these participants also shared that the effort was worth it because of the positive impact the program …	Physical opportunity	3	Environmental context and resources	5	Environmental restrucuring, Enablement	Guidelines, Environmental/social planning, Service provision	“Yes, I just did not show [to pick up my incentive] . . . because I didn’t have transportation.” (Diabetes management)

## Sheet: CHI-F-COM
Author, year	Income Status	Behaviour	Facilitator	COM-B	COMB Code	TDF	TDF Code	Intervention Functions	Policy Categories	Quote
Wingfield 2015	Middle	Other	[Patients self-empowerment] The majority of participants did not have bank accounts and some patients described the act of opening a bank account as empowering.	Reflective motivation	5	Beliefs about capabilities	8	Enablement	Service provision	“…especially for female patients, who are not normally the financial decision-makers of the households in these communities”
Wingfield 2015	Middle	Other	[Strong multi-sectorial collaboration network] Strong multi-sectorial collaboration with Peruvian National TB Program and bank staff, allowing multiple, virtual cash transfers to be made and recorded, reducing fraud and security risks through regular steering meetings, focus group discussions and contact in the health posts. The conditional cash transfers were facilitated by multisectorial collab…	Physical opportunity	3	Environmental context and resources	5	Environmental restructuring, Enablement	Environmental/Social planning, Service provision	“The CRESIPT project and Peruvian National TB Program are complementary and should continue to support each other in a common goal.”
Wingfield 2015	Middle	Other	[ Holisticity of the intervention, Economic element complimented by social and educational support ] The socioeconomic intervention was holistic and household-centred with the economic dimension of cash transfers being complemented by social support activities including household visits and participatory community meetings .	Social opportunity	4	Social influences	6	Environmental restructuring, Enablement	Enviornmental/social planning, Service provision	“The meetings generated good solidarity and camaraderie”
Wingfield 2015	Middle	Other	[Educational component of the intervention] In addition to TB prevention and control messages, an educational component was an important element of the participatory community meetings, in which participants were involved in educational activities concerning: managing a household budget; spending and saving responsibly; and meeting the conditions for cash transfers. This TB-related and financial …	Psychological capability	2	Knowledge	2	Education	Communication/marketing, Service provision	“I understood and learnt more, and saw that I was not alone”
Patel 2019	Middle	Other	[ Direct transfer to the bank as the Form of Incentive delivery] Providers felt that compared with cash disbursement, direct transfer of the benefit to the beneficiary’s bank account improved the chances that the benefit is being used for nutritional support as against cash which was more likely to be spent casually for miscellaneous purposes.The bank transfers reduced chances of corrouption in h…	Physical opportunity	3	Environmental context and resources	5	Restriction, Environmental restructuring, Enablement	Guidelines, Regulation, Environmental/Social planning, Service provision	" …if wife has TB, in many cases her husband may be having addiction like smoking, drinking alcohol; so he might be using this money for drinking alcohol. Or else, if husband is having TB, he would drink alcohol if we give him cash."
Musiimenta 2024	Middle	Other	Receiving the mobile money incentives and SMS text message or alarm reminders and being monitored via the real-time adherence monitor	Automatic motivation	6	Reinforcement	14	Incentivisation, Environmental restructuring	Communication/marketing, Service provision
Musiimenta 2024	Middle	Other	[Inital orientation to using the real-time monitor --> Percieved Ease of use and Reliability regardless of illetracy level] All participants reported that the intervention was easy to use, including accessing and reading SMS text message, retreving the Wisepill app to retrieve their meds and withdraw the incentive. The intervention components worked as expected, with 97.4% of SMS messages sent as…	Physical opportunity	3	Environmental context and resources	5	Environmental restructuring, Enablement	Fiscal measures, Regulation, Environmental/Social planning, Service provision	"Before you started sending me mobile money, there were times when I would request people to borrow me money or help me with transport to the hospital, but sometimes they would also not be in a position to give me money, so I would miss picking my medication from the hospital...I stopped working when I got sick. I stay far from the hospital.This study helped a lot by sending me [money for] transp…
Musiimenta 2024	Middle	Other	[Perceived monitoring and emotional support a "sense of connectedness"] Real-time adherence monitoring created a sense of "being watched," and being "cared for" which encouraged timely medication adherence to demonstrate their commitment to the health care providers who they felt were concerned about their health and would not be happy with nonadherence. [Social Norms and treatment supporters] Pa…	Social opportunity	4	Social influences	6	Environmental restructuring, Enablement	Enviornmental/social planning, Service provision	"Whenever I felt like not taking the medication, I always got motivated me to take medication because I knew that you people cared for me so much to the extent that you gave me this monitor and kept texting me to remind me to take medication and even sent me money to go to the clinic. I felt encouraged because you were really interested in seeing my health condition improve. [Female patient, aged…
Musiimenta 2024	Middle	Other	[Reminders and layout of the monitors enhancing motivation and self-regulaion] SMS text messages and electronic pillbox alarms reminded participants to take their medication on time comabted forgetfulness and busy participants due to other comepting priorities which was repoted regularly.	Psychological capability	2	Behavioural regulation	4	Enablement	Service provision	"Whenever I would receive a message about my adherence percentage, and it’s below, it would motivate me to be serious so that next time I don’t miss out again. [Male patient, aged 39 years]"
Mohan 2024	Middle	Other	[ External enablers: Favourable perception of the scheme and its benefits] NPY was perceived as a very helpful initiative by the providers and beneficiaries. It was considered especially beneficial for the poor and socially marginalized sections, including the elderly, tribes, and those residing in remote and difficult terrains. Many providers observed that the scheme enhanced the notification of…	Reflective motivation	5	Beliefs about consequences	7	Modelling	Service provision	"This DBT scheme (NPY) is very good. The government provides nutrition to the patients because most of them are malnourished, and they are affected by TB mainly because they are malnourished. More and more patients are joining for treatment."- Districtlevel NTEP official. “The scheme was very helpful. Because of the scheme I was able to take fruits and vegetables and care for my health while I wa…
Mohan 2024	Middle	Other	[Politcal and administration commitment] In one of the southern states, the federal government and the district administrations displayed a relatively higher political and administrative commitment to implementing the scheme. The recent initiative of the central government to upgrade the health sub-centres, the basic units of India’s primary health care network, to Health & Wellness Centres (H&WC…	Physical opportunity	3	Environmental context and resources	5	Environmental restructuring, Enablement	Guidelines, Regulation, Fiscal measures, Environmental/Social planning, Service provision	"Health and Wellness Centres have now started, and so now we have more people helping us with the field work at the village level."- District NTEP staff "When we started the implementation, initially we had the Chief Secretary reviewing the program every month. Also, we had district and state level officials reviewing this program almost on a 15 days basis. So, there was a lot of political and ad…
Mohan 2024	Middle	Other	[Leadership Driven Campaign for incentive prerequistes] In another study setting from the northeast, the district head led a campaign to promote Aadhar Card (identity card with a unique identity number that can be obtained voluntarily by all residents of India) registration. In this state, where a large migrant population and people from tribal communities typically struggle or hesitate to regist…	Social opportunity	4	Social influences	6	Environmental restructuring, Enablement	Enviornmental/social planning, Service provision
Chadhar 2025	Middle	Other	[Procedural Assistance with bank account creation] The senior treatment supervisor with 5 years of experience at the post, in an in-depth interview expressed that almost all the patients possessed a bank account. Those without bank account were either assisted in creating a new bank accountor one of the family member's accounts was used to facilitate the receipt of monetary benefit. [Centralized …	Physical opportunity	3	Environmental context and resources	5	Environmental restructuring, Enablement	Guidelines, Environmental/Social planning, Service provision	“Almost all patients possess a bank account, those who don't have one, we help them get it. Otherwise, we enter the bank details of their family member who has bank account” -Senior treatment supervisor, Tuberculosis unit. “Nikshay is a centralized scheme. Even if the patient is a migrant, the funds will be still transferred to him/her. We do have transfer-in and transfer-out of patients in our f…
Chadhar 2025	Middle	Other	[High knowledge and awarness of the scheme] Regarding awareness of the Nikshay Poshan Yojana, 84.8% (n = 213) of patients were aware of the scheme, while only 6.1% (n = 13) correctly identified its name. Among the aware participants, 61.9% had knowledge of the amount and purpose of the program, with 68% (n = 145) citing the Directly Observed Treatment, Short-course (DOTS) provider as their source…	Psychological capability	2	Knowledge	2	Education	Communication/marketing, Service provision
Kim 2012	High	Smoking	[ Positive perceptions on the amount, timing and frequency of the incentives] Overall, employees thought favorably about the amount and timing of the incentives	Automatic motivation	6	Reinforcement	14	Incentivisation	Communication/marketing, Fiscal measures	The [motivator was] financial gain . . . along with the fact that they wanted to quit. Some of them that were on the fence— [the financial incentive is] what did it. (LHC)
Kim 2012	High	Smoking	(Professional motivation: positive attitudes towards the FI and viewingsuch as a rewarding experience as a the driver behind implementation) helping smokers quit and the financial return for participants as factors motivating them to implement the program at their worksite.	Reflective motivation	5	Beliefs about consequences	7	Education, Persuasion	Communication/marketing, Service provision
Kim 2012	High	Smoking	[Dissemination: Marketing strategies and materials; easy to implement ] Among multiple channels, used to market the intv. e-mail, posters, television screens, newsletters/fliers, meetings, and medical staff. . Paycheck stuffers and word-of-mouth recruitment were cited as the most effective ways to disseminate information about the program, especially for hourly employees. Marketing materials for …	Physical opportunity	3	Environmental context and resources	5	Environmental restructuring, Enablement	Guidelines, Environmental/Social planning, Service provision	"I put out the fliers and scoop, word of mouth, got the union body in. We have a safety council; we announced it there, word of mouth. You know who your key people are . . . if you can get two or three of them interested they bring the rest." - (LHC) "[The hourly employees are] pretty much on the assembly line, so they don’t have access to computers. Most of your salary employees have regular acc…
Allan 2012	High	Smoking	[ Linking failute to external events] Perception of falure and inability to quit, not going to be blamed for relapse; Where failure was attributed to unanticipated and unavoidable life events, such as bereavement or divorce, there was a sense in which responsibility for failure and associated shame or guilt was diverted. In these circumstances there appeared a greater likelihood for future re-eng…	Automatic motivation	6	Emotion	13	Persuasion, Enablement	Communication/marketing, Service provision	“I went back to smoking, we had a horrible family emergency which kind of threw me back into smoking and what not again. Yeah, I’ve tried very hard, very, very hard but unfortunately it didn’t work. I’m a bit disappointed in myself but I’ll try again.” (female, 36, unemployed, group 2)
Hefler 2013	High	Smoking	[Relevent and trustworthy systems for target population] The partnership models used in the research projects that were presented generated reflection and discussion about the most appropriate models for the variety of contexts in Australia. In response to the description of strategies used in the Scottish study, it was suggested that using Aboriginal community controlled health services (or thei…	Physical opportunity	3	Environmental context and resources	5	Environmental restructuring, Enablement	Environmental/Social planning, Service provision
Passey 2018	High	Smoking	[ Providers positive experience and their identity as competent facilitator] : Only one site ran the group program. This team enjoyed running the groups because the women seemed to find interacting with each other and discussing their experiences to be helpful. The manual and resources were helpful and made running the group sessions easy.	Reflective motivation	5	Role and identity	9	Persuasion	Communication/Marketing
Passey 2018	High	Smoking	[Visual validation of quit and other support tools] it [Co breath test] was also perceived to increase women’s resolve to quit because it was highly visual and generated a strong emotional response.	Automatic motivation	6	Emotion	13	Persuasion, Enablement	Communication/marketing, Service provision	“they show you all the stuff that’s in a cigarette and it really makes you want to stop” and “[The Smokerlyzer was] something to look forward to each week … knowing how low I was, was really motivating”.
Passey 2018	High	Smoking	[Rewards' empowerment, source of Pride and sustained contact] The rewards for quitting were well received and the staff considered them empowering. Women: None of the participants spontaneously mentioned the rewards but, when asked, indicated that they were motivating and helpful, with no negative comments. Several women discussed the purchases they had made, or what they had planned to buy if th…	Automatic motivation	6	Reinforcement	14	Incentivisation	Communication/marketing, Fiscal measures, Service provision	“I think the biggest word is proud. They were just so proud that they got enough vouchers to get a hair straightener or – one got a fridge.”
Passey 2018	High	Smoking	[ Well-structured, Sufficent and appealing Resources and the vouchers in themselves] All the AMIHS teams viewed the program very positively, stating it was good to have a comprehensive program to offer. They considered the program well structured and that most women valued it. The resources were “at the right level” and useful as a prop for conversations. SU: Women: The visual aids (premie nappy,…	Physical opportunity	3	Environmental context and resources	5	Environmental restructuring, Enablement	Environmental/Social planning, Service provision	“The premie nappy made a huge impression, and the brochures that were for each stage … they were good resources, … I like using those with women.” “Just having the vouchers and that to offer them, I think that did lead a lot of women to make that decision easier.”
Passey 2018	High	Smoking	[Group sessions, family memebers enagagment and sustained providers support] Those who attended groups enjoyed them and usually attended regularly. They valued the opportunity to share stories, the activities offered and the information on strategies. ...It was also good to offer [NRT] to family members, because this made it easier to broach the topic of quitting.	Social opportunity	4	Social influences	6	Environmental restructuring, Enablement, Modelling	Enviornmental/social planning, Service provision, Communication/marketing	“[Groups] relaxed you and took your mind off things that were really stressing you out … Just the little activities and meeting other people that were doing the same thing. “I think the sustained visiting and phone calls. The fact that we were mentioning it all the time and how you’re going and trying to come up with things to help them cope.”
Smoking in Pregnancy Challenge Group 2019	High	Smoking	[Having operational infrastructure, guidelines and capacity in place to accommodate potential increases in service urilisation] Key to all incentive schemes is that they operate in addition to a whole systems approach including specialist support, in line with relevant NICE Guidance. That vouchers are contingent upon CO validated quits is illustrative of the need for NICE Guidance to be in place …	Physical opportunity	3	Environmental context and resources	5	Restriction, Training, Environmental restructuring, Enablement	Guidelines, Regulation, Environmental/Social planning, Service provision
Smoking in Pregnancy Challenge Group 2019	High	Smoking	[Clear guidance and training on scheme for advisors and HCP] All staff engaged in the scheme need clear guidance and training. This could be through written reminders or aids for staff. Guidance must be provided to healthcare professionals promoting and delivering the scheme on: »» Why an incentive scheme is being implemented and the evidence base, »» What the scheme is and what support women wil…	Psychological capability	2	Knowledge	2	Education	Guidelines, Communication/marketing, Service provision
Smoking in Pregnancy Challenge Group 2019	High	Smoking	[Capacity for feedback and evaluation from stakeholders enables adaptive management] Based on valuable feedback from participants and practitioners, schemes can be made more effective. e.g. following the North West Smoking and Pregnancy Reward Scheme which preceded SaSFPS, staff fedback that a key future development should be the ability to offer incentives to prompt a quit attempt (i.e. on or ar…	Psychological capability	2	Behavioural regulation	4	Enablement	Guidelines, Service provision, Environmental/social planning
Apata 2019	High	Smoking	[Peer-led approach to support quitting] In the qualitative assessment, some participants attributed their success in quitting to peer support. Increase participation in the program, Outcomes were improved and there was increased acceptability with a peer led approach	Social opportunity	4	Social influences	6	Enablement	Service provision
Apata 2019	High	Smoking	{incentives and other physical support tools/resources]the use of NRT, the inclusion of visual aids and attending informative counseling sessions. In addition to the benefits of peer support, some Peer Motivators reported that incentives (both monetary and non-monetary) were an important factor in motivating participants to quit. [Structured cocreation: Stakeholder-informed program optimisation: …	Physical opportunity	3	Environmental context and resources	5	Restriction, Training, Environmental restructuring, Enablement	Guidelines, Fiscal measures, Environmental/Social planning, Service provision
Joyce 2021	High	Smoking	[ Robust system and Infrastructure] SmokeBeat website for providers, Earned incentives were straightforward to calculate from the SmokeBeat dashboard and data sent by Somatix, and incentives were easily and immediately loaded onto ClinCards. For users, Participants had minimal issues using ClinCards for routine daily purchases, including groceries and gas.	Physical opportunity	3	Environmental context and resources	5	Environmental restructuring, Enablement	Regulation, Fiscal measures, Environmental/Social planning, Service provision
Too 2021	High	Smoking	[Training additional staff and seeking support from specialists] Other staff have been trained to provide support during busy periods. In addition, dedicated named contacts with the procurement team has helped to minimise payment issues.	Physical opportunity	3	Environmental context and resources	5	Training, Environmental restructuring, Enablement	Guidelines, Environmental/Social planning, Service provision
Breunis 2023	High	Smoking	[CO test and the validation of quit status] participants found the CO breath test motivating to stop smoking.	Automatic motivation	6	Reinforcement	14	Environmental restructuring	Communication/marketing
Breunis 2023	High	Smoking	[ The personalised experience and kind communications] personal conversations between healthcare providers and patients/clients were important (H). personal, kind, positive, understanding, and non-judgmental contact with the researcher was very important for the participants to successfully support smoking cessation	Social opportunity	4	Social influences	6	Enablement	Guidelines, Service provision
Breunis 2023	High	Smoking	[Easy refrral process, minimal communication needs and importance of collabration] Little explanation of the content of the study to patients/clients and easy referral to the researcher were important in the recruitment of participants (H) Healthcare providers felt that easy referral was important for success and moderators of the group sessions would prefer more collaboration between all moderat…	Physical opportunity	3	Environmental context and resources	5	Environmental restructuring	Guidelines, regulation, Environmental/Social planning
Yon 2024	High	Smoking	[ highly valued service delivery and supportive staff interactions] we learned that the ongoing support from staff, accountability of regular cotinine testing, and gift cards for baby supplies were highly valued, contributing to success. Participants also noted the program informed them about the risks of smoking during pregnancy.	Automatic motivation	6	Reinforcement	14	Incentivisation, Environmental restructing	Communication/marketing, Fiscal measures, Service provision
Tranby 2025	High	Smoking	[High acceptability of the intervention] Regarding acceptability, four of the five PWS rated the family-based incentives program as “very helpful” in quitting smoking, rated having their family member in the program with them as “very helpful”, and “definitely would” recommend the program to other Alaska Native people interested in quitting. Four PWS reported that it was helpful to have family me…	Automatic motivation	6	Reinforcement	14	Incentivisation, Environmental restructuring	Fiscal measures, Service provision, Environmental/social planning	“I’ve tried to quit a lot of times over the years. The monetary incentives helped me.” “It helped me quit in 6 months’ time!!”
Greene 2017	High	Other	SU: [high acceptability and positive experience of the FI]: High acceptability of intervention and positive experiences with the financial incentive and strategies facilitated implementation. Positive Perceived emtional, health and financial benefits as well as feeling rewarded or cared for was a main value perceived by patients; this was closely tied to the financial benefit for some.	Automatic motivation	6	Reinforcement	14	Incentivisation	Communication/marketing, Fiscal measures, Service provision	“I think it's a good amount. I think, at that level, it's a very positive incentive. I think if it was less, if it was like $25 or so, people who may not generally keep their appointments probably wouldn't do it for $25, unless they were motivated in terms of their health. But I thought $70 was verygenerous.” (Patient, non-Hispanic black male, 66 years old)
Greene 2017	High	Other	[Percieved value of the intervention] Positive Perceived emtional, health and financial benefits as well as feeling rewarded or cared for was a main value perceived by patients; this was closely tied to the financial benefit for some. Perceived effectiveness and health-related benefits also contributed to acceptability.	Reflective motivation	5	Beliefs about consequences	7	Education,Persuasio, Modelling	Communication/marketing, Service provision
Greene 2017	High	Other	SP: [Positive opinioins of FII on SU] Investigators and staff described overall positive opinions of the financial incentive intervention, largely attributed to emotional benefits, such as positive interactions with patients during the gift card exchange, improved morale among clinic staff and providers, and feeling good about being able to provide positive reinforcement or do something to help s…	Automatic motivation	6	Emotion	13	Persuasion	Communication/marketing	“What I liked about the study was that, when you have patients that don’t have any money to buy food or toilet paper and they would come to you with a smile on their face because they have $70to spend on something they were not going to be able to buy, something that they needed–it’s not even things that they just wanted, it’s needed–[handing out gift cards] made mefeel good.” (Staff member)
Greene 2017	High	Other	[Feeling empowered in their professional roles].. improved morale among clinic staff and providers, and feeling good about being able to provide positive reinforcement or do something to help someone in need.Some investigators indicated that they appreciated these positive benefits so much that they would gladly implement a financial incentive intervention again in the future, whether or not fina…	Reflective motivation	5	Role and identity	9	Persuasion	Communication/Marketing	. I think we felt empowered to do something for our [patients], beyond what we do already. We do know how many of them strugglef financially. We heard many positive comments.” (Investigator)
Greene 2017	High	Other	[ Local autonomy and Flexibility around FI administration] to gift card distribution procedures across sites. (It was noted that logistical challenges were reported to have largely occurred during the initial phases of the study) Sites were given flexibility to develop their own processes for gift card distribution, and many described a learning curve as procedures, clinic flow, and gift card a p…	Physical opportunity	3	Environmental context and resources	5	Environmental restructuring, Enablement	Regulation, Environmental/Social planning, Service provision	“By the end of it, it was just going off seamlessly” (Investigator).
Greene 2017	High	Other	[ Well-trained and sedicated staff] Sites attributed the smooth implementation thanks to well-trained and dedicated study staff.	Psychological capability	2	Skills	1	Training	Guidelines, Regulation, Service provision	“I think that we were very fortunate to have the young ladies that we had work on our study here. And they did a great job. And I think they learned verymuch how to work with the flow of the clinic, work with the providers, and work with the patients so that it really became much smoother over time.”
[truncated: 119 more rows]

## Sheet: B&F Freq(%) 
Barriers							Facilitators							Combined
COMB	Frequency	%	TDF	Frequencey	%		COMB	Frequency	%	TDF	Frequencey	%		COMB	Frequency	%	TDF	Frequencey	%
Total	213		Total	213			Total	161		Total	161			Total	374		Total	374
Physical opportunity	60	0.28169	Environmental context and resources	60	0.28169		Physical opportunity	44	0.273292	Environmental context and resources	44	0.26506		Physical opportunity	104	0.273292	Environmental context and resources	104	0.26506
Reflective motivation	55	0.258216	Beliefs about consequences	27	0.126761		Reflective motivation	36	0.223602	Social influences	25	0.150602		Reflective motivation	91	0.223602	Social influences	52	0.150602
[truncated: 33 more rows]

## Sheet: BCW- Functions and policies
Relevant intervention functions and policy categories linked to top TDF domains presented as barriers/facilitators
[truncated: 18 more rows]

## Sheet: Income status- Subgroup results
Implementation issues based on country’s income status
[truncated: 2 more rows]

[truncated: 1 more sheets: GRADE CERQUAL ASSESSMENT]
